# Supplementary material for: Sediment contributing invasive dreissenid species in a calcareous shallow lake – Possible implications for shortening life span of lakes by filling
Source: Oxford University Press journal article supplement (doi:10.1525/elementa.380), 2019-01-01
Supplement: elementa-7-380-s1.xlsx [file elementa-7-380-s1.xlsx]

## Sheet: Table S1 detailed substrata
Table S1
Detailed substrata
Underwater hard surface of all regions using ortophotoes and water levels [m2]
Boat pile	Date	05.2003.	05.2003.	06.2003.	06.2003.	06.2003.	06.2003.	07.2003.	07.2003.	07.2003.	07.2003.	07.2003.	08.2003.	08.2003.	08.2003.	08.2003.	09.2003.	09.2003.	09.2003.	09.2003.	09.2003.	10.2003.	10.2003.	10.2003.	10.2003.	11.2003.	11.2003.	11.2003.	11.2003.	12.2003.	12.2003.	12.2003.	12.2003.	12.2003.	01.2004.	01.2004.	01.2004.	01.2004.	02.2004.	02.2004.	02.2004.	02.2004.	03.2004.	03.2004.	03.2004.	03.2004.	03.2004.	04.2004.	04.2004.
	Water Level	63.7143	62.2857	60.7143	60.4286	56.5714	52.7143	49.5714	46.5714	42.1429	39.8571	40.5714	37.2857	35.2857	32.5714	29.1429	28	27.2857	26.7143	25.5714	24	24.8571	24.8571	23.7143	25	27.4286	27	27.7143	29	30	30	30	30.5714	31	31.5714	32.8571	35	36.8571	38.7143	40.4286	41.7143	43.2857	46.7143	48.7143	50.8571	53.5714	58.2857	61.7143	68.7143
Number of the ortophoto, region
53 Zala torok		11.0158	10.8886	10.7486	10.7232	10.3797	10.0363	9.75645	9.48932	9.095	8.89147	8.95507	8.66251	8.48442	8.24274	7.93745	7.83569	7.77209	7.72121	7.61944	7.47952	7.55584	7.55584	7.45408	7.56856	7.78481	7.74665	7.81025	7.92473	8.01377	8.01377	8.01377	8.06465	8.10281	10.5741	10.7226	10.9701	11.1845	11.399	11.5969	11.7454	11.9268	12.3228	12.5537	12.8011	13.1146	13.659	14.0549	14.8632
55, 3 Keszthely		88.1261	87.1084	85.989	85.7855	83.0379	80.2904	78.0516	75.9146	72.76	71.1318	71.6406	69.3	67.8754	65.9419	63.4996	62.6855	62.1767	61.7696	60.9555	59.8362	60.4467	60.4467	59.6326	60.5485	62.2785	61.9732	62.482	63.3978	64.1102	64.1102	64.1102	64.5172	64.8225	84.5932	85.7809	87.7604	89.4761	91.1917	92.7753	93.9631	95.4147	98.582	100.43	102.409	104.917	109.272	112.439	118.906
55, 1-2 Keszthely		0	0	0	0	0	0	0	0	0	0	0	0	0	0	0	0	0	0	0	0	0	0	0	0	0	0	0	0	0	0	0	0	0	0	0	0	0	0	0	0	0	0	0	0	0	0	0	0
57, 2-3 Keszthely		0	0	0	0	0	0	0	0	0	0	0	0	0	0	0	0	0	0	0	0	0	0	0	0	0	0	0	0	0	0	0	0	0	0	0	0	0	0	0	0	0	0	0	0	0	0	0	0
		20.2507	19.9963	19.7164	19.6655	18.9786	18.2918	17.7321	17.1978	16.4092	16.0021	16.1293	15.5442	15.188	14.7046	14.0941	13.8905	13.7633	13.6616	13.458	13.1782	13.3308	13.3308	13.1273	13.3563	13.7888	13.7125	13.8397	14.0686	14.2467	14.2467	14.2467	14.3485	14.4248	18.8388	19.1357	19.6306	20.0595	20.4884	20.8843	21.1813	21.5442	22.336	22.7979	23.2928	23.9197	25.0084	25.8003	27.4169
60, 2-3 Vonyarcvashegy		40.5013	39.9925	39.4328	39.3311	37.9573	36.5835	35.4641	34.3956	32.8183	32.0042	32.2586	31.0883	30.376	29.4093	28.1881	27.7811	27.5267	27.3231	26.9161	26.3564	26.6617	26.6617	26.2546	26.7126	27.5776	27.4249	27.6793	28.1372	28.4934	28.4934	28.4934	28.6969	28.8496	37.6776	38.2715	39.2613	40.1191	40.9769	41.7687	42.3626	43.0884	44.672	45.5958	46.5856	47.8393	50.0169	51.6005	54.8338
61, 1-2-3 Balatongyörök		222.757	219.959	216.881	216.321	208.765	201.209	195.053	189.176	180.501	176.023	177.422	170.986	167.068	161.751	155.035	152.796	151.397	150.277	148.039	144.96	146.639	146.639	144.401	146.919	151.677	150.837	152.236	154.755	156.714	156.714	156.714	157.833	158.673	207.227	210.493	215.937	220.655	225.373	229.728	232.994	236.986	245.696	250.777	256.221	263.116	275.093	283.803	301.586
62 + 63, 2-3 Balatongyörök, alulról a 3. utcától délre, kis maradék rész		50.6267	49.9907	49.2911	49.1639	47.4466	45.7294	44.3302	42.9945	41.0229	40.0053	40.3233	38.8604	37.97	36.7616	35.2352	34.7263	34.4083	34.1539	33.6451	32.9455	33.3271	33.3271	32.8183	33.3907	34.4719	34.2811	34.5991	35.1716	35.6168	35.6168	35.6168	35.8712	36.062	47.097	47.8393	49.0766	50.1488	51.2211	52.2109	52.9532	53.8605	55.8401	56.9948	58.232	59.7992	62.5211	64.5006	68.5422
63, 1-2 Afrikapark		101.253	99.9813	98.5821	98.3277	94.8932	91.4588	88.6603	85.989	82.0458	80.0105	80.6465	77.7209	75.94	73.5232	70.4703	69.4527	68.8167	68.3079	67.2902	65.891	66.6542	66.6542	65.6366	66.7814	68.9439	68.5623	69.1983	70.3431	71.2335	71.2335	71.2335	71.7423	72.1239	94.194	95.6787	98.1531	100.298	102.442	104.422	105.906	107.721	111.68	113.99	116.464	119.598	125.042	129.001	137.084
64 + 65 Balatoneerics		30.376	29.9944	29.5746	29.4983	28.468	27.4376	26.5981	25.7967	24.6137	24.0032	24.194	23.3163	22.782	22.057	21.1411	20.8358	20.645	20.4924	20.1871	19.7673	19.9963	19.9963	19.691	20.0344	20.6832	20.5687	20.7595	21.1029	21.3701	21.3701	21.3701	21.5227	21.6372	28.2582	28.7036	29.4459	30.0893	30.7327	31.3265	31.7719	32.3163	33.504	34.1969	34.9392	35.8795	37.5126	38.7004	41.1253
66, 2-3 Szigliget		111.379	109.979	108.44	108.16	104.383	100.605	97.5263	94.588	90.2503	88.0116	88.7112	85.493	83.534	80.8755	77.5173	76.398	75.6983	75.1387	74.0193	72.4801	73.3197	73.3197	72.2003	73.4596	75.8383	75.4185	76.1181	77.3774	78.3569	78.3569	78.3569	78.9166	79.3363	103.613	105.247	107.968	110.327	112.686	114.864	116.497	118.493	122.848	125.389	128.11	131.558	137.546	141.901	150.793
67, 2-3 Szigliget - Balatontördemic, óriási hajdani nádas és lápvidék		0	0	0	0	0	0	0	0	0	0	0	0	0	0	0	0	0	0	0	0	0	0	0	0	0	0	0	0	0	0	0	0	0	0	0	0	0	0	0	0	0	0	0	0	0	0	0	0
68, 2-3 Badacsony		151.88	149.972	147.873	147.492	142.34	137.188	132.99	128.984	123.069	120.016	120.97	116.581	113.91	110.285	105.705	104.179	103.225	102.462	100.935	98.8365	99.9813	99.9813	98.4549	100.172	103.416	102.843	103.797	105.515	106.85	106.85	106.85	107.614	108.186	141.291	143.518	147.23	150.446	153.663	156.633	158.86	161.582	167.52	170.984	174.696	179.398	187.563	193.502	205.627
69, 1-2 Badacsony		30.376	29.9944	29.5746	29.4983	28.468	27.4376	26.5981	25.7967	24.6137	24.0032	24.194	23.3163	22.782	22.057	21.1411	20.8358	20.645	20.4924	20.1871	19.7673	19.9963	19.9963	19.691	20.0344	20.6832	20.5687	20.7595	21.1029	21.3701	21.3701	21.3701	21.5227	21.6372	28.2582	28.7036	29.4459	30.0893	30.7327	31.3265	31.7719	32.3163	33.504	34.1969	34.9392	35.8795	37.5126	38.7004	41.1253
72, 2-3 Badacsonyörs		0	0	0	0	0	0	0	0	0	0	0	0	0	0	0	0	0	0	0	0	0	0	0	0	0	0	0	0	0	0	0	0	0	0	0	0	0	0	0	0	0	0	0	0	0	0	0	0
73, 1-2 Ábrahámhegy		616.882	609.759	601.923	600.499	581.266	562.033	546.361	531.402	509.32	497.922	501.484	485.1	475.128	461.593	444.497	438.799	435.237	432.388	426.689	418.853	423.127	423.127	417.428	423.84	435.949	433.812	437.374	443.785	448.771	448.771	448.771	451.621	453.758	592.152	600.466	614.323	626.332	638.342	649.427	657.741	667.903	690.074	703.007	716.864	734.416	764.902	787.073	832.339
73, 2-3 Ábrahámhegy		231.331	228.66	225.721	225.187	217.975	210.762	204.885	199.276	190.995	186.721	188.057	181.913	178.173	173.097	166.686	164.549	163.214	162.145	160.008	157.07	158.673	158.673	156.536	158.94	163.481	162.68	164.015	166.419	168.289	168.289	168.289	169.358	170.159	222.057	225.175	230.371	234.875	239.378	243.535	246.653	250.464	258.778	263.628	268.824	275.406	286.838	295.152	312.127
74, 2-3 Kővágóörs		77.1103	76.2199	75.2404	75.0623	72.6582	70.2541	68.2951	66.4253	63.665	62.2403	62.6855	60.6375	59.391	57.6992	55.5622	54.8498	54.4046	54.0484	53.3361	52.3566	52.8909	52.8909	52.1786	52.9799	54.4937	54.2265	54.6717	55.4731	56.0964	56.0964	56.0964	56.4526	56.7197	74.019	75.0583	76.7904	78.2916	79.7927	81.1784	82.2177	83.4879	86.2593	87.8759	89.608	91.802	95.6127	98.3841	104.042
75, 2-3 Révfülöp		209.299	206.883	204.224	203.741	197.215	190.69	185.373	180.297	172.805	168.938	170.146	164.588	161.204	156.612	150.812	148.878	147.67	146.703	144.769	142.111	143.561	143.561	141.628	143.803	147.911	147.186	148.395	150.57	152.262	152.262	152.262	153.228	153.953	200.909	203.73	208.431	212.506	216.58	220.341	223.162	226.61	234.132	238.52	243.222	249.177	259.52	267.043	282.401
76, 2-3 Balatonszepezd		220.315	217.771	214.973	214.464	207.595	200.726	195.129	189.786	181.9	177.829	179.101	173.25	169.688	164.855	158.749	156.714	155.442	154.424	152.389	149.59	151.117	151.117	149.082	151.371	155.696	154.933	156.205	158.495	160.275	160.275	160.275	161.293	162.056	211.483	214.452	219.401	223.69	227.979	231.938	234.908	238.537	246.455	251.074	256.023	262.292	273.179	281.097	297.264
77, 1-2 Balatonszepezd		440.63	435.542	429.945	428.928	415.19	401.452	390.258	379.573	363.8	355.659	358.203	346.5	339.377	329.709	317.498	313.428	310.883	308.848	304.778	299.181	302.234	302.234	298.163	302.743	311.392	309.866	312.41	316.989	320.551	320.551	320.551	322.586	324.113	422.966	428.904	438.802	447.38	455.958	463.877	469.815	477.074	492.91	502.148	512.046	524.583	546.358	562.195	594.528
78, 2-3 Zánka		517.741	511.762	505.186	503.99	487.848	471.706	458.553	445.998	427.465	417.899	420.888	407.138	398.768	387.409	373.06	368.277	365.288	362.897	358.114	351.537	355.125	355.125	350.342	355.722	365.886	364.092	367.082	372.462	376.647	376.647	376.647	379.039	380.832	496.985	503.963	515.593	525.672	535.751	545.055	552.033	560.562	579.169	590.024	601.654	616.385	641.971	660.579	698.57
79, 2-3 Vérkút		110.158	108.886	107.486	107.232	103.797	100.363	97.5645	94.8932	90.95	88.9147	89.5507	86.6251	84.8442	82.4274	79.3745	78.3569	77.7209	77.2121	76.1944	74.7952	75.5584	75.5584	74.5408	75.6856	77.8481	77.4665	78.1025	79.2473	80.1377	80.1377	80.1377	80.6465	81.0281	105.741	107.226	109.701	111.845	113.99	115.969	117.454	119.268	123.228	125.537	128.011	131.146	136.59	140.549	148.632
80, 2-3 Balatonakali		0	0	0	0	0	0	0	0	0	0	0	0	0	0	0	0	0	0	0	0	0	0	0	0	0	0	0	0	0	0	0	0	0	0	0	0	0	0	0	0	0	0	0	0	0	0	0	0
81, 2-3 Balatonakali		462.662	457.319	451.442	450.374	435.949	421.524	409.771	398.552	381.99	373.442	376.113	363.825	356.346	346.195	333.373	329.099	326.428	324.291	320.017	314.14	317.345	317.345	313.071	317.88	326.962	325.359	328.03	332.839	336.578	336.578	336.578	338.715	340.318	444.114	450.35	460.742	469.749	478.756	487.07	493.306	500.927	517.556	527.256	537.648	550.812	573.676	590.304	624.254
82, 2-3 Balatonudvari		165.236	163.328	161.229	160.848	155.696	150.544	146.347	142.34	136.425	133.372	134.326	129.938	127.266	123.641	119.062	117.535	116.581	115.818	114.292	112.193	113.338	113.338	111.811	113.528	116.772	116.2	117.154	118.871	120.207	120.207	120.207	120.97	121.542	158.612	160.839	164.551	167.768	170.984	173.954	176.181	178.903	184.841	188.306	192.017	196.719	204.884	210.823	222.948
83, 2-3 Örvényes		33.0473	32.6657	32.2459	32.1696	31.1392	30.1089	29.2693	28.468	27.285	26.6744	26.8652	25.9875	25.4533	24.7282	23.8124	23.5071	23.3163	23.1636	22.8583	22.4386	22.6675	22.6675	22.3622	22.7057	23.3544	23.2399	23.4307	23.7742	24.0413	24.0413	24.0413	24.194	24.3084	31.7224	32.1678	32.9102	33.5535	34.1969	34.7907	35.2361	35.7805	36.9683	37.6611	38.4034	39.3437	40.9769	42.1646	44.5896
84, 1-2 Tihany		37.0542	36.6725	36.2528	36.1765	35.1461	34.1158	33.2762	32.4749	31.2919	30.6813	30.8721	29.9944	29.4602	28.7351	27.8192	27.514	27.3231	27.1705	26.8652	26.4454	26.6744	26.6744	26.3691	26.7126	27.3613	27.2468	27.4376	27.7811	28.0482	28.0482	28.0482	28.2008	28.3153	36.9188	37.3642	38.1065	38.7499	39.3932	39.9871	40.4325	40.9769	42.1646	42.8575	43.5998	44.5401	46.1732	47.3609	49.7859
85, 2-3 Tihany		222.325	220.035	217.517	217.059	210.877	204.695	199.657	194.849	187.751	184.088	185.233	179.966	176.761	172.411	166.915	165.084	163.939	163.023	161.191	158.673	160.046	160.046	158.215	160.275	164.168	163.481	164.626	166.686	168.289	168.289	168.289	169.205	169.892	221.513	224.185	228.639	232.499	236.359	239.923	242.595	245.861	252.988	257.145	261.599	267.24	277.039	284.166	298.715
85, 1-2 Tihany		0	0	0	0	0	0	0	0	0	0	0	0	0	0	0	0	0	0	0	0	0	0	0	0	0	0	0	0	0	0	0	0	0	0	0	0	0	0	0	0	0	0	0	0	0	0	0	0
87, 2-3 Tihany (Óvár)		0	0	0	0	0	0	0	0	0	0	0	0	0	0	0	0	0	0	0	0	0	0	0	0	0	0	0	0	0	0	0	0	0	0	0	0	0	0	0	0	0	0	0	0	0	0	0	0
86, 2-3 Tihany (Diós)		98.8111	97.7935	96.6741	96.4706	93.723	90.9754	88.7366	86.5996	83.445	81.8168	82.3256	79.9851	78.5604	76.6269	74.1846	73.3705	72.8617	72.4547	71.6406	70.5212	71.1318	71.1318	70.3177	71.2335	72.9635	72.6582	73.167	74.0829	74.7952	74.7952	74.7952	75.2023	75.5075	98.4501	99.6378	101.617	103.333	105.049	106.632	107.82	109.272	112.439	114.287	116.266	118.774	123.129	126.296	132.762
86, 1-2 Tihany (Diós)		49.4055	48.8967	48.337	48.2353	46.8615	45.4877	44.3683	43.2998	41.7225	40.9084	41.1628	39.9925	39.2802	38.3135	37.0923	36.6853	36.4309	36.2273	35.8203	35.2606	35.5659	35.5659	35.1588	35.6168	36.4817	36.3291	36.5835	37.0414	37.3976	37.3976	37.3976	37.6011	37.7538	49.225	49.8189	50.8087	51.6665	52.5243	53.3161	53.91	54.6358	56.2195	57.1433	58.133	59.3868	61.5643	63.1479	66.3812
88-89, 2-3 Balatonfüred		0	0	0	0	0	0	0	0	0	0	0	0	0	0	0	0	0	0	0	0	0	0	0	0	0	0	0	0	0	0	0	0	0	0	0	0	0	0	0	0	0	0	0	0	0	0	0	0
89, 1-2 Balatonfüred		197.622	195.587	193.348	192.941	187.446	181.951	177.473	173.199	166.89	163.634	164.651	159.97	157.121	153.254	148.369	146.741	145.723	144.909	143.281	141.042	142.264	142.264	140.635	142.467	145.927	145.316	146.334	148.166	149.59	149.59	149.59	150.405	151.015	196.9	199.276	203.235	206.666	210.097	213.264	215.64	218.543	224.878	228.573	232.532	237.547	246.257	252.592	265.525
91-92, 2-2-3 Csopak		83.1143	81.9694	80.7101	80.4812	77.3901	74.2991	71.7805	69.3764	65.8274	63.9957	64.5681	61.935	60.3323	58.1571	55.4095	54.4937	53.9212	53.4633	52.5474	51.2881	51.975	51.975	51.0592	52.0895	54.0357	53.6923	54.2647	55.295	56.0964	56.0964	56.0964	56.5543	56.8978	74.3819	75.7181	77.9451	79.8752	81.8053	83.5869	84.9231	86.5562	90.1194	92.198	94.425	97.2458	102.145	105.708	112.983
92-93, 3-2-3 Alsóörs		313.987	309.662	304.905	304.04	292.363	280.686	271.171	262.089	248.681	241.762	243.924	233.977	227.922	219.705	209.325	205.865	203.702	201.972	198.513	193.755	196.35	196.35	192.89	196.783	204.135	202.837	205	208.892	211.92	211.92	211.92	213.65	214.947	280.998	286.046	294.459	301.751	309.042	315.773	320.821	326.99	340.451	348.303	356.717	367.373	385.882	399.343	426.826
93, 1-2 Alsóörs		73.8793	72.8617	71.7423	71.5388	68.7912	66.0437	63.8049	61.6679	58.5133	56.8851	57.3939	55.0533	53.6287	51.6952	49.2529	48.4388	47.93	47.5229	46.7088	45.5895	46.2	46.2	45.3859	46.3018	48.0318	47.7265	48.2353	49.1511	49.8635	49.8635	49.8635	50.2705	50.5758	66.1173	67.305	69.2846	71.0002	72.7158	74.2994	75.4872	76.9389	80.1062	81.9537	83.9333	86.4407	90.7958	93.9631	100.43
95 Balatonalmádi		0	0	0	0	0	0	0	0	0	0	0	0	0	0	0	0	0	0	0	0	0	0	0	0	0	0	0	0	0	0	0	0	0	0	0	0	0	0	0	0	0	0	0	0	0	0	0	0
96-97, 1-2 Vörösberény		86.8922	85.493	83.9538	83.674	79.896	76.1181	73.0398	70.1014	65.7638	63.525	64.2247	61.0064	59.0475	56.389	53.0308	51.9114	51.2118	50.6521	49.5327	47.9936	48.8331	48.8331	47.7137	48.9731	51.3517	50.932	51.6316	52.8909	53.8704	53.8704	53.8704	54.43	54.8498	71.858	73.4911	76.213	78.572	80.931	83.1085	84.7416	86.7377	91.0927	93.6331	96.355	99.8028	105.791	110.146	119.037
96-97,2-3 Budatava		31.5972	31.0883	30.5287	30.4269	29.0531	27.6793	26.5599	25.4914	23.9141	23.1	23.3544	22.1842	21.4718	20.5051	19.2839	18.8769	18.6225	18.419	18.0119	17.4522	17.7575	17.7575	17.3505	17.8084	18.6734	18.5207	18.7751	19.2331	19.5892	19.5892	19.5892	19.7927	19.9454	26.1302	26.724	27.7138	28.5716	29.4294	30.2213	30.8151	31.541	33.1246	34.0484	35.0382	36.2919	38.4694	40.0531	43.2864
98,2-3 Fűzfő, a Balaton sarka		105.477	103.95	102.271	101.966	97.8443	93.723	90.3648	87.1593	82.4274	79.9851	80.7483	77.2375	75.1005	72.2003	68.5368	67.3157	66.5525	65.9419	64.7207	63.0417	63.9575	63.9575	62.7364	64.1102	66.7051	66.2472	67.0104	68.3842	69.4527	69.4527	69.4527	70.0633	70.5212	92.2474	94.0291	96.9984	99.5718	102.145	104.521	106.302	108.48	113.231	116.002	118.971	122.733	129.265	134.016	143.716
99, 2-3 Fűzfő		35.1588	34.65	34.0903	33.9886	32.6148	31.241	30.1216	29.0531	27.4758	26.6617	26.9161	25.7458	25.0335	24.0668	22.8456	22.4386	22.1842	21.9806	21.5736	21.0139	21.3192	21.3192	20.9121	21.3701	22.235	22.0824	22.3368	22.7947	23.1509	23.1509	23.1509	23.3544	23.5071	30.7491	31.343	32.3328	33.1906	34.0484	34.8402	35.4341	36.1599	37.7436	38.6674	39.6572	40.9109	43.0884	44.672	47.9053
102, 2-3 Balatonkenese		549.668	543.054	535.778	534.455	516.596	498.736	484.184	470.294	449.789	439.206	442.513	427.299	418.039	405.471	389.597	384.305	380.998	378.352	373.06	365.784	369.753	369.753	364.461	370.414	381.659	379.675	382.982	388.935	393.565	393.565	393.565	396.211	398.195	519.832	527.552	540.42	551.571	562.723	573.016	580.737	590.173	610.76	622.769	635.636	651.935	680.242	700.83	742.862
103, 2-3 Balatonkenese		338.258	334.187	329.709	328.895	317.905	306.915	297.96	289.412	276.793	270.28	272.316	262.953	257.255	249.521	239.752	236.495	234.46	232.832	229.575	225.098	227.54	227.54	224.284	227.947	234.867	233.646	235.681	239.345	242.194	242.194	242.194	243.822	245.043	319.897	324.648	332.566	339.428	346.291	352.625	357.376	363.183	375.852	383.243	391.161	401.191	418.611	431.28	457.146
104, 2-3 Akarattya		338.258	334.187	329.709	328.895	317.905	306.915	297.96	289.412	276.793	270.28	272.316	262.953	257.255	249.521	239.752	236.495	234.46	232.832	229.575	225.098	227.54	227.54	224.284	227.947	234.867	233.646	235.681	239.345	242.194	242.194	242.194	243.822	245.043	319.897	324.648	332.566	339.428	346.291	352.625	357.376	363.183	375.852	383.243	391.161	401.191	418.611	431.28	457.146
106, 1-2 Aliga		350.927	346.093	340.776	339.809	326.758	313.707	303.073	292.922	277.938	270.204	272.621	261.503	254.736	245.552	233.951	230.084	227.667	225.734	221.867	216.55	219.45	219.45	215.583	219.934	228.151	226.701	229.118	233.468	236.851	236.851	236.851	238.785	240.235	314.057	319.699	329.102	337.251	345.4	352.922	358.564	365.46	380.504	389.28	398.683	410.594	431.28	446.325	477.041
106, 2-3 Aliga		0	0	0	0	0	0	0	0	0	0	0	0	0	0	0	0	0	0	0	0	0	0	0	0	0	0	0	0	0	0	0	0	0	0	0	0	0	0	0	0	0	0	0	0	0	0	0	0
108,1-2 Balatonszentgyörgy		0	0	0	0	0	0	0	0	0	0	0	0	0	0	0	0	0	0	0	0	0	0	0	0	0	0	0	0	0	0	0	0	0	0	0	0	0	0	0	0	0	0	0	0	0	0	0	0
110, 1-2 Balatonberény		91.128	89.9832	88.7239	88.4949	85.4039	82.3129	79.7943	77.3901	73.8412	72.0095	72.5819	69.9488	68.346	66.1709	63.4233	62.5074	61.935	61.4771	60.5612	59.3019	59.9888	59.9888	59.0729	60.1033	62.0495	61.706	62.2785	63.3088	64.1102	64.1102	64.1102	64.5681	64.9116	84.7746	86.1108	88.3378	90.2679	92.198	93.9796	95.3158	96.9489	100.512	102.591	104.818	107.639	112.538	116.101	123.376
111,1 Balatonberény		0	0	0	0	0	0	0	0	0	0	0	0	0	0	0	0	0	0	0	0	0	0	0	0	0	0	0	0	0	0	0	0	0	0	0	0	0	0	0	0	0	0	0	0	0	0	0	0
112, 1-2 Balatonmáriafürdő		238.531	234.46	229.983	229.168	218.178	207.188	198.233	189.685	177.066	170.553	172.589	163.227	157.528	149.794	140.025	136.768	134.733	133.105	129.849	125.371	127.813	127.813	124.557	128.22	135.14	133.919	135.954	139.618	142.467	142.467	142.467	144.095	145.316	190.566	195.316	203.235	210.097	216.96	223.294	228.045	233.852	246.521	253.911	261.83	271.859	289.28	301.949	327.815
113, 1-2 Balatonmáriafürdő		171.444	168.518	165.3	164.715	156.816	148.916	142.48	136.336	127.266	122.585	124.048	117.319	113.223	107.664	100.643	98.3023	96.8394	95.6692	93.3286	90.1104	91.8658	91.8658	89.5253	92.1584	97.132	96.2543	97.7171	100.35	102.398	102.398	102.398	103.568	104.446	136.969	140.384	146.075	151.007	155.94	160.493	163.907	168.081	177.187	182.499	188.19	195.399	207.92	217.026	235.617
114, 1-2 Balatonmáriafürdő		387.612	380.998	373.722	372.399	354.539	336.68	322.128	308.238	287.733	277.149	280.457	265.243	255.983	243.415	227.54	222.249	218.941	216.296	211.004	203.728	207.697	207.697	202.405	208.358	219.603	217.618	220.926	226.879	231.509	231.509	231.509	234.155	236.139	309.669	317.389	330.256	341.408	352.559	362.853	370.573	380.009	400.597	412.606	425.473	441.772	470.079	490.667	532.699
115, 1-2 Balatonfenyves		417.428	410.305	402.469	401.045	381.812	362.579	346.907	331.948	309.866	298.468	302.03	285.646	275.674	262.139	245.043	239.345	235.783	232.934	227.235	219.399	223.673	223.673	217.975	224.386	236.495	234.358	237.92	244.331	249.317	249.317	249.317	252.167	254.304	333.49	341.804	355.661	367.67	379.679	390.765	399.079	409.241	431.412	444.345	458.202	475.754	506.239	528.41	573.676
116, 1-2 Balatonfenyves		238.531	234.46	229.983	229.168	218.178	207.188	198.233	189.685	177.066	170.553	172.589	163.227	157.528	149.794	140.025	136.768	134.733	133.105	129.849	125.371	127.813	127.813	124.557	128.22	135.14	133.919	135.954	139.618	142.467	142.467	142.467	144.095	145.316	190.566	195.316	203.235	210.097	216.96	223.294	228.045	233.852	246.521	253.911	261.83	271.859	289.28	301.949	327.815
117, 1-2 Balatonfenyves		89.449	87.9225	86.2435	85.9382	81.8168	77.6954	74.3373	71.1318	66.3998	63.9575	64.7207	61.21	59.0729	56.1727	52.5093	51.2881	50.5249	49.9144	48.6932	47.0141	47.93	47.93	46.7088	48.0826	50.6776	50.2196	50.9829	52.3566	53.4251	53.4251	53.4251	54.0357	54.4937	71.4621	73.2437	76.213	78.7864	81.3599	83.7353	85.5169	87.6945	92.4454	95.2168	98.1861	101.947	108.48	113.231	122.931
118, 1-2 Bélatelep		22.3622	21.9806	21.5609	21.4845	20.4542	19.4239	18.5843	17.7829	16.6	15.9894	16.1802	15.3025	14.7682	14.0432	13.1273	12.822	12.6312	12.4786	12.1733	11.7535	11.9825	11.9825	11.6772	12.0207	12.6694	12.5549	12.7457	13.0892	13.3563	13.3563	13.3563	13.5089	13.6234	17.8655	18.3109	19.0533	19.6966	20.34	20.9338	21.3792	21.9236	23.1114	23.8042	24.5465	25.4868	27.12	28.3077	30.7327
119, 1-2 Fonyód		0	0	0	0	0	0	0	0	0	0	0	0	0	0	0	0	0	0	0	0	0	0	0	0	0	0	0	0	0	0	0	0	0	0	0	0	0	0	0	0	0	0	0	0	0	0	0	0
120, 2-3 Fonyód		0	0	0	0	0	0	0	0	0	0	0	0	0	0	0	0	0	0	0	0	0	0	0	0	0	0	0	0	0	0	0	0	0	0	0	0	0	0	0	0	0	0	0	0	0	0	0	0
121, 1-2 Balatonboglár		0	0	0	0	0	0	0	0	0	0	0	0	0	0	0	0	0	0	0	0	0	0	0	0	0	0	0	0	0	0	0	0	0	0	0	0	0	0	0	0	0	0	0	0	0	0	0	0
122, 1-2 Balatonboglár		0	0	0	0	0	0	0	0	0	0	0	0	0	0	0	0	0	0	0	0	0	0	0	0	0	0	0	0	0	0	0	0	0	0	0	0	0	0	0	0	0	0	0	0	0	0	0	0
123, 1-2 Balatonboglár		119.265	117.23	114.991	114.584	109.089	103.594	99.1164	94.8424	88.5331	85.2767	86.2943	81.6133	78.7639	74.897	70.0124	68.3842	67.3666	66.5525	64.9243	62.6855	63.9067	63.9067	62.2785	64.1102	67.5701	66.9595	67.9771	69.8089	71.2335	71.2335	71.2335	72.0476	72.6582	95.2828	97.6582	101.617	105.049	108.48	111.647	114.023	116.926	123.261	126.956	130.915	135.93	144.64	150.974	163.907
124, 1-2 Balatonlelle		0	0	0	0	0	0	0	0	0	0	0	0	0	0	0	0	0	0	0	0	0	0	0	0	0	0	0	0	0	0	0	0	0	0	0	0	0	0	0	0	0	0	0	0	0	0	0	0
125, 1-2 Balatonlelle		29.8163	29.3075	28.7478	28.6461	27.2723	25.8985	24.7791	23.7106	22.1333	21.3192	21.5736	20.4033	19.691	18.7242	17.5031	17.096	16.8416	16.6381	16.2311	15.6714	15.9767	15.9767	15.5696	16.0275	16.8925	16.7399	16.9943	17.4522	17.8084	17.8084	17.8084	18.0119	18.1646	23.8207	24.4146	25.4043	26.2621	27.12	27.9118	28.5056	29.2315	30.8151	31.7389	32.7287	33.9824	36.1599	37.7436	40.9769
126, 2-3 Balatonszemes		0	0	0	0	0	0	0	0	0	0	0	0	0	0	0	0	0	0	0	0	0	0	0	0	0	0	0	0	0	0	0	0	0	0	0	0	0	0	0	0	0	0	0	0	0	0	0	0
127, 1-2 Balatonöszöd		0	0	0	0	0	0	0	0	0	0	0	0	0	0	0	0	0	0	0	0	0	0	0	0	0	0	0	0	0	0	0	0	0	0	0	0	0	0	0	0	0	0	0	0	0	0	0	0
128, 1-2 Balatonszárszó		313.071	307.729	301.852	300.784	286.359	271.934	260.18	248.961	232.399	223.851	226.523	214.235	206.755	196.605	183.783	179.508	176.837	174.7	170.426	164.549	167.755	167.755	163.481	168.289	177.371	175.769	178.44	183.248	186.988	186.988	186.988	189.125	190.728	250.117	256.353	266.746	275.753	284.76	293.074	299.309	306.931	323.559	333.259	343.651	356.816	379.679	396.308	430.257
129, 1-2 Balatonszárszó		163.99	161.191	158.113	157.553	149.997	142.442	136.285	130.408	121.733	117.255	118.655	112.218	108.3	102.983	96.267	94.0283	92.629	91.5096	89.2709	86.1926	87.8716	87.8716	85.6329	88.1515	92.9089	92.0693	93.4686	95.9872	97.9461	97.9461	97.9461	99.0655	99.905	131.014	134.28	139.724	144.442	149.16	153.515	156.781	160.773	169.483	174.564	180.008	186.903	198.88	207.59	225.373
132, 1-2 Balatonföldvár		0	0	0	0	0	0	0	0	0	0	0	0	0	0	0	0	0	0	0	0	0	0	0	0	0	0	0	0	0	0	0	0	0	0	0	0	0	0	0	0	0	0	0	0	0	0	0	0
133, 1-2 Szántód		22.3622	21.9806	21.5609	21.4845	20.4542	19.4239	18.5843	17.7829	16.6	15.9894	16.1802	15.3025	14.7682	14.0432	13.1273	12.822	12.6312	12.4786	12.1733	11.7535	11.9825	11.9825	11.6772	12.0207	12.6694	12.5549	12.7457	13.0892	13.3563	13.3563	13.3563	13.5089	13.6234	17.8655	18.3109	19.0533	19.6966	20.34	20.9338	21.3792	21.9236	23.1114	23.8042	24.5465	25.4868	27.12	28.3077	30.7327
134, 1-2 Szántód		275.801	271.094	265.917	264.976	252.268	239.561	229.207	219.323	204.733	197.202	199.556	188.731	182.142	173.199	161.904	158.138	155.785	153.903	150.137	144.96	147.784	147.784	144.019	148.255	156.256	154.844	157.197	161.433	164.728	164.728	164.728	166.61	168.022	220.341	225.835	234.99	242.925	250.86	258.184	263.677	270.391	285.04	293.585	302.741	314.337	334.479	349.128	379.036
135, 1-2 Zamárdi		0	0	0	0	0	0	0	0	0	0	0	0	0	0	0	0	0	0	0	0	0	0	0	0	0	0	0	0	0	0	0	0	0	0	0	0	0	0	0	0	0	0	0	0	0	0	0	0
136, 1-2 Zamárdi		81.9949	80.5957	79.0565	78.7767	74.9987	71.2208	68.1425	65.2041	60.8665	58.6277	59.3274	56.1091	54.1502	51.4917	48.1335	47.0141	46.3145	45.7548	44.6354	43.0963	43.9358	43.9358	42.8164	44.0757	46.4544	46.0347	46.7343	47.9936	48.9731	48.9731	48.9731	49.5327	49.9525	65.5069	67.14	69.8619	72.2209	74.5799	76.7574	78.3905	80.3866	84.7416	87.2821	90.0039	93.4517	99.4398	103.795	112.686
137, 1-2 Zamárdi		81.9949	80.5957	79.0565	78.7767	74.9987	71.2208	68.1425	65.2041	60.8665	58.6277	59.3274	56.1091	54.1502	51.4917	48.1335	47.0141	46.3145	45.7548	44.6354	43.0963	43.9358	43.9358	42.8164	44.0757	46.4544	46.0347	46.7343	47.9936	48.9731	48.9731	48.9731	49.5327	49.9525	65.5069	67.14	69.8619	72.2209	74.5799	76.7574	78.3905	80.3866	84.7416	87.2821	90.0039	93.4517	99.4398	103.795	112.686
138, 1-2 Siófok		0	0	0	0	0	0	0	0	0	0	0	0	0	0	0	0	0	0	0	0	0	0	0	0	0	0	0	0	0	0	0	0	0	0	0	0	0	0	0	0	0	0	0	0	0	0	0	0
139, 1-2 Siófok beton a 142-be mérve		7.45408	7.32688	7.18695	7.16151	6.81807	6.47462	6.19477	5.92765	5.53332	5.32979	5.3934	5.10083	4.92275	4.68106	4.37577	4.27401	4.21041	4.15953	4.05777	3.91784	3.99417	3.99417	3.8924	4.00689	4.22313	4.18497	4.24857	4.36305	4.4521	4.4521	4.4521	4.50298	4.54114	5.95517	6.10364	6.35108	6.56554	6.77999	6.97795	7.12641	7.30787	7.70378	7.93473	8.18218	8.49561	9.03999	9.4359	10.2442
142, 1-2 Siófok beton a 139-ről is ide mérve		0	0	0	0	0	0	0	0	0	0	0	0	0	0	0	0	0	0	0	0	0	0	0	0	0	0	0	0	0	0	0	0	0	0	0	0	0	0	0	0	0	0	0	0	0	0	0	0
143, Siófok		0	0	0	0	0	0	0	0	0	0	0	0	0	0	0	0	0	0	0	0	0	0	0	0	0	0	0	0	0	0	0	0	0	0	0	0	0	0	0	0	0	0	0	0	0	0	0	0
144, 1-2 Siófok		0	0	0	0	0	0	0	0	0	0	0	0	0	0	0	0	0	0	0	0	0	0	0	0	0	0	0	0	0	0	0	0	0	0	0	0	0	0	0	0	0	0	0	0	0	0	0	0
145, 1-2 Siófok		0	0	0	0	0	0	0	0	0	0	0	0	0	0	0	0	0	0	0	0	0	0	0	0	0	0	0	0	0	0	0	0	0	0	0	0	0	0	0	0	0	0	0	0	0	0	0	0
146, 2-3 Siófok		101.584	100.185	98.6457	98.3659	94.588	90.81	87.7317	84.7933	80.4557	78.217	78.9166	75.6983	73.7394	71.0809	67.7227	66.6034	65.9037	65.344	64.2247	62.6855	63.525	63.525	62.4057	63.665	66.0437	65.6239	66.3235	67.5828	68.5623	68.5623	68.5623	69.122	69.5417	90.9112	92.5444	95.2663	97.6252	99.9842	102.162	103.795	105.791	110.146	112.686	115.408	118.856	124.844	129.199	138.091
147, 1-2 Balatonvilágos		138.524	136.616	134.517	134.135	128.984	123.832	119.634	115.627	109.712	106.659	107.614	103.225	100.554	96.9285	92.3492	90.8228	89.8687	89.1055	87.5791	85.4802	86.6251	86.6251	85.0986	86.8159	90.0595	89.4871	90.4411	92.1584	93.494	93.494	93.494	94.2572	94.8296	123.97	126.197	129.909	133.125	136.342	139.311	141.538	144.26	150.199	153.663	157.375	162.076	170.242	176.181	188.306
148, 1-2 Balatonvilágos		0	0	0	0	0	0	0	0	0	0	0	0	0	0	0	0	0	0	0	0	0	0	0	0	0	0	0	0	0	0	0	0	0	0	0	0	0	0	0	0	0	0	0	0	0	0	0	0
148, 2-3 Balatonvilágos		0	0	0	0	0	0	0	0	0	0	0	0	0	0	0	0	0	0	0	0	0	0	0	0	0	0	0	0	0	0	0	0	0	0	0	0	0	0	0	0	0	0	0	0	0	0	0	0
	Date	05.2003.	05.2003.	06.2003.	06.2003.	06.2003.	06.2003.	07.2003.	07.2003.	07.2003.	07.2003.	07.2003.	08.2003.	08.2003.	08.2003.	08.2003.	09.2003.	09.2003.	09.2003.	09.2003.	09.2003.	10.2003.	10.2003.	10.2003.	10.2003.	11.2003.	11.2003.	11.2003.	11.2003.	12.2003.	12.2003.	12.2003.	12.2003.	12.2003.	01.2004.	01.2004.	01.2004.	01.2004.	02.2004.	02.2004.	02.2004.	02.2004.	03.2004.	03.2004.	03.2004.	03.2004.	03.2004.	04.2004.	04.2004.
Boat pile	SUM	9847.73	9715.31	9569.65	9543.17	9185.64	8828.11	8536.79	8258.71	7848.22	7636.35	7702.56	7398	7212.61	6961.02	6643.21	6537.28	6471.07	6418.1	6312.17	6166.51	6245.96	6245.96	6140.02	6259.2	6484.31	6444.59	6510.8	6629.97	6722.66	6722.66	6722.66	6775.63	6815.36	8907.21	9061.76	9319.35	9542.6	9765.84	9971.91	10126.5	10315.4	10727.5	10967.9	11225.5	11551.8	12118.5	12530.6	13372.1
Pier Pile
	Date	05.2003.	05.2003.	06.2003.	06.2003.	06.2003.	06.2003.	07.2003.	07.2003.	07.2003.	07.2003.	07.2003.	08.2003.	08.2003.	08.2003.	08.2003.	09.2003.	09.2003.	09.2003.	09.2003.	09.2003.	10.2003.	10.2003.	10.2003.	10.2003.	11.2003.	11.2003.	11.2003.	11.2003.	12.2003.	12.2003.	12.2003.	12.2003.	12.2003.	01.2004.	01.2004.	01.2004.	01.2004.	02.2004.	02.2004.	02.2004.	02.2004.	03.2004.	03.2004.	03.2004.	03.2004.	03.2004.	04.2004.	04.2004.
	Water Level	63.7143	62.2857	60.7143	60.4286	56.5714	52.7143	49.5714	46.5714	42.1429	39.8571	40.5714	37.2857	35.2857	32.5714	29.1429	28	27.2857	26.7143	25.5714	24	24.8571	24.8571	23.7143	25	27.4286	27	27.7143	29	30	30	30	30.5714	31	31.5714	32.8571	35	36.8571	38.7143	40.4286	41.7143	43.2857	46.7143	48.7143	50.8571	53.5714	58.2857	61.7143	68.7143
Number of the ortophoto, region
53 Zala torok		0	0	0	0	0	0	0	0	0	0	0	0	0	0	0	0	0	0	0	0	0	0	0	0	0	0	0	0	0	0	0	0	0	0	0	0	0	0	0	0	0	0	0	0	0	0	0	0
55, 3 Keszthely		0	0	0	0	0	0	0	0	0	0	0	0	0	0	0	0	0	0	0	0	0	0	0	0	0	0	0	0	0	0	0	0	0	0	0	0	0	0	0	0	0	0	0	0	0	0	0	0
55, 1-2 Keszthely		542.856	536.588	529.693	528.439	511.514	494.589	480.798	467.634	448.201	438.172	441.306	426.888	418.112	406.202	391.158	386.143	383.008	380.501	375.486	368.591	372.352	372.352	367.337	372.979	383.635	381.755	384.889	390.531	394.919	394.919	394.919	397.426	399.307	521.094	528.41	540.604	551.173	561.741	571.496	578.812	587.755	607.265	618.646	630.841	646.286	673.113	692.624	732.458
57, 2-3 Keszthely		0	0	0	0	0	0	0	0	0	0	0	0	0	0	0	0	0	0	0	0	0	0	0	0	0	0	0	0	0	0	0	0	0	0	0	0	0	0	0	0	0	0	0	0	0	0	0	0
58 + 59, 2-3 Gyenesdiás		181.446	179.167	176.659	176.203	170.049	163.894	158.879	154.092	147.026	143.379	144.519	139.276	136.085	131.754	126.283	124.459	123.319	122.408	120.584	118.077	119.444	119.444	117.621	119.672	123.547	122.864	124.003	126.055	127.65	127.65	127.65	128.562	129.246	168.796	171.456	175.89	179.733	183.576	187.124	189.784	193.036	200.131	204.269	208.704	214.32	224.076	231.17	245.655
60, 2-3 Vonyarcvashegy		453.615	447.916	441.648	440.508	425.122	409.735	397.198	385.231	367.565	358.447	361.296	348.189	340.211	329.384	315.707	311.148	308.299	306.019	301.46	295.192	298.611	298.611	294.052	299.181	308.869	307.159	310.008	315.137	319.126	319.126	319.126	321.406	323.115	421.989	428.641	439.726	449.333	458.941	467.809	474.461	482.59	500.327	510.673	521.759	535.801	560.189	577.926	614.138
61, 1-2-3 Balatongyörök		181.446	179.167	176.659	176.203	170.049	163.894	158.879	154.092	147.026	143.379	144.519	139.276	136.085	131.754	126.283	124.459	123.319	122.408	120.584	118.077	119.444	119.444	117.621	119.672	123.547	122.864	124.003	126.055	127.65	127.65	127.65	128.562	129.246	168.796	171.456	175.89	179.733	183.576	187.124	189.784	193.036	200.131	204.269	208.704	214.32	224.076	231.17	245.655
62 + 63, 2-3 Balatongyörök, alulról a 3. utcától délre, kis maradék rész		0	0	0	0	0	0	0	0	0	0	0	0	0	0	0	0	0	0	0	0	0	0	0	0	0	0	0	0	0	0	0	0	0	0	0	0	0	0	0	0	0	0	0	0	0	0	0	0
63, 1-2 Afrikapark		0	0	0	0	0	0	0	0	0	0	0	0	0	0	0	0	0	0	0	0	0	0	0	0	0	0	0	0	0	0	0	0	0	0	0	0	0	0	0	0	0	0	0	0	0	0	0	0
64 + 65 Balatoneerics		0	0	0	0	0	0	0	0	0	0	0	0	0	0	0	0	0	0	0	0	0	0	0	0	0	0	0	0	0	0	0	0	0	0	0	0	0	0	0	0	0	0	0	0	0	0	0	0
66, 2-3 Szigliget		45.3615	44.7916	44.1648	44.0508	42.5122	40.9735	39.7198	38.5231	36.7565	35.8447	36.1296	34.8189	34.0211	32.9384	31.5707	31.1148	30.8299	30.6019	30.146	29.5192	29.8611	29.8611	29.4052	29.9181	30.8869	30.7159	31.0008	31.5137	31.9126	31.9126	31.9126	32.1406	32.3115	42.1989	42.8641	43.9726	44.9333	45.8941	46.7809	47.4461	48.259	50.0327	51.0673	52.1759	53.5801	56.0189	57.7926	61.4138
67, 2-3 Szigliget - Balatontördemic, óriási hajdani nádas és lápvidék		0	0	0	0	0	0	0	0	0	0	0	0	0	0	0	0	0	0	0	0	0	0	0	0	0	0	0	0	0	0	0	0	0	0	0	0	0	0	0	0	0	0	0	0	0	0	0	0
68, 2-3 Badacsony		272.169	268.75	264.989	264.305	255.073	245.841	238.319	231.139	220.539	215.068	216.778	208.914	204.127	197.63	189.424	186.689	184.979	183.612	180.876	177.115	179.167	179.167	176.431	179.508	185.321	184.295	186.005	189.082	191.476	191.476	191.476	192.843	193.869	253.194	257.184	263.836	269.6	275.365	280.686	284.676	289.554	300.196	306.404	313.055	321.48	336.113	346.755	368.483
69, 1-2 Badacsony		90.723	89.5833	88.3296	88.1016	85.0243	81.9471	79.4396	77.0462	73.513	71.6894	72.2593	69.6379	68.0423	65.8768	63.1414	62.2296	61.6597	61.2038	60.2921	59.0383	59.7222	59.7222	58.8104	59.8362	61.7737	61.4318	62.0017	63.0274	63.8252	63.8252	63.8252	64.2811	64.6231	84.3978	85.7281	87.9452	89.8667	91.7882	93.5619	94.8921	96.518	100.065	102.135	104.352	107.16	112.038	115.585	122.828
72, 2-3 Badacsonyörs		49.3506	48.7807	48.1539	48.0399	46.5012	44.9626	43.7089	42.5122	40.7456	39.8338	40.1187	38.808	38.0102	36.9275	35.5598	35.1039	34.8189	34.591	34.1351	33.5083	33.8502	33.8502	33.3943	33.9072	34.8759	34.705	34.9899	35.5028	35.9017	35.9017	35.9017	36.1296	36.3006	47.3722	48.0373	49.1459	50.1066	51.0673	51.9542	52.6193	53.4323	55.2059	56.2406	57.3491	58.7533	61.1921	62.9658	66.5871
73, 1-2 Ábrahámhegy		98.7012	97.5614	96.3077	96.0798	93.0025	89.9252	87.4178	85.0243	81.4912	79.6676	80.2374	77.6161	76.0204	73.8549	71.1196	70.2078	69.6379	69.182	68.2702	67.0165	67.7003	67.7003	66.7886	67.8143	69.7519	69.41	69.9798	71.0056	71.8034	71.8034	71.8034	72.2593	72.6012	94.7443	96.0746	98.2917	100.213	102.135	103.908	105.239	106.865	110.412	112.481	114.698	117.507	122.384	125.932	133.174
73, 2-3 Ábrahámhegy		197.402	195.123	192.615	192.16	186.005	179.85	174.836	170.049	162.982	159.335	160.475	155.232	152.041	147.71	142.239	140.416	139.276	138.364	136.54	134.033	135.401	135.401	133.577	135.629	139.504	138.82	139.96	142.011	143.607	143.607	143.607	144.519	145.202	189.489	192.149	196.583	200.426	204.269	207.817	210.477	213.729	220.824	224.962	229.397	235.013	244.769	251.863	266.348
74, 2-3 Kővágóörs		49.3506	48.7807	48.1539	48.0399	46.5012	44.9626	43.7089	42.5122	40.7456	39.8338	40.1187	38.808	38.0102	36.9275	35.5598	35.1039	34.8189	34.591	34.1351	33.5083	33.8502	33.8502	33.3943	33.9072	34.8759	34.705	34.9899	35.5028	35.9017	35.9017	35.9017	36.1296	36.3006	47.3722	48.0373	49.1459	50.1066	51.0673	51.9542	52.6193	53.4323	55.2059	56.2406	57.3491	58.7533	61.1921	62.9658	66.5871
75, 2-3 Révfülöp		98.7012	97.5614	96.3077	96.0798	93.0025	89.9252	87.4178	85.0243	81.4912	79.6676	80.2374	77.6161	76.0204	73.8549	71.1196	70.2078	69.6379	69.182	68.2702	67.0165	67.7003	67.7003	66.7886	67.8143	69.7519	69.41	69.9798	71.0056	71.8034	71.8034	71.8034	72.2593	72.6012	94.7443	96.0746	98.2917	100.213	102.135	103.908	105.239	106.865	110.412	112.481	114.698	117.507	122.384	125.932	133.174
76, 2-3 Balatonszepezd		0	0	0	0	0	0	0	0	0	0	0	0	0	0	0	0	0	0	0	0	0	0	0	0	0	0	0	0	0	0	0	0	0	0	0	0	0	0	0	0	0	0	0	0	0	0	0	0
77, 1-2 Balatonszepezd		0	0	0	0	0	0	0	0	0	0	0	0	0	0	0	0	0	0	0	0	0	0	0	0	0	0	0	0	0	0	0	0	0	0	0	0	0	0	0	0	0	0	0	0	0	0	0	0
78, 2-3 Zánka		0	0	0	0	0	0	0	0	0	0	0	0	0	0	0	0	0	0	0	0	0	0	0	0	0	0	0	0	0	0	0	0	0	0	0	0	0	0	0	0	0	0	0	0	0	0	0	0
79, 2-3 Vérkút		49.3506	48.7807	48.1539	48.0399	46.5012	44.9626	43.7089	42.5122	40.7456	39.8338	40.1187	38.808	38.0102	36.9275	35.5598	35.1039	34.8189	34.591	34.1351	33.5083	33.8502	33.8502	33.3943	33.9072	34.8759	34.705	34.9899	35.5028	35.9017	35.9017	35.9017	36.1296	36.3006	47.3722	48.0373	49.1459	50.1066	51.0673	51.9542	52.6193	53.4323	55.2059	56.2406	57.3491	58.7533	61.1921	62.9658	66.5871
80, 2-3 Balatonakali		0	0	0	0	0	0	0	0	0	0	0	0	0	0	0	0	0	0	0	0	0	0	0	0	0	0	0	0	0	0	0	0	0	0	0	0	0	0	0	0	0	0	0	0	0	0	0	0
81, 2-3 Balatonakali		0	0	0	0	0	0	0	0	0	0	0	0	0	0	0	0	0	0	0	0	0	0	0	0	0	0	0	0	0	0	0	0	0	0	0	0	0	0	0	0	0	0	0	0	0	0	0	0
82, 2-3 Balatonudvari		49.3506	48.7807	48.1539	48.0399	46.5012	44.9626	43.7089	42.5122	40.7456	39.8338	40.1187	38.808	38.0102	36.9275	35.5598	35.1039	34.8189	34.591	34.1351	33.5083	33.8502	33.8502	33.3943	33.9072	34.8759	34.705	34.9899	35.5028	35.9017	35.9017	35.9017	36.1296	36.3006	47.3722	48.0373	49.1459	50.1066	51.0673	51.9542	52.6193	53.4323	55.2059	56.2406	57.3491	58.7533	61.1921	62.9658	66.5871
83, 2-3 Örvényes		0	0	0	0	0	0	0	0	0	0	0	0	0	0	0	0	0	0	0	0	0	0	0	0	0	0	0	0	0	0	0	0	0	0	0	0	0	0	0	0	0	0	0	0	0	0	0	0
84, 1-2 Tihany		110.668	109.529	108.275	108.047	104.97	101.892	99.385	96.9916	93.4584	91.6348	92.2047	89.5833	87.9877	85.8222	83.0868	82.175	81.6051	81.1492	80.2374	78.9837	79.6676	79.6676	78.7558	79.7816	81.7191	81.3772	81.9471	82.9728	83.7706	83.7706	83.7706	84.2265	84.5684	110.264	111.594	113.811	115.733	117.654	119.428	120.758	122.384	125.932	128.001	130.218	133.026	137.904	141.451	148.694
85, 2-3 Tihany		1217.35	1204.82	1191.02	1188.52	1154.67	1120.82	1093.24	1066.91	1028.04	1007.98	1014.25	985.416	967.864	944.044	913.955	903.925	897.656	892.642	882.612	868.821	876.343	876.343	866.314	877.597	898.91	895.149	901.418	912.701	921.477	921.477	921.477	926.492	930.253	1212.9	1227.54	1251.93	1273.06	1294.2	1313.71	1328.34	1346.23	1385.25	1408.01	1432.4	1463.29	1516.94	1555.97	1635.63
85, 1-2 Tihany		110.668	109.529	108.275	108.047	104.97	101.892	99.385	96.9916	93.4584	91.6348	92.2047	89.5833	87.9877	85.8222	83.0868	82.175	81.6051	81.1492	80.2374	78.9837	79.6676	79.6676	78.7558	79.7816	81.7191	81.3772	81.9471	82.9728	83.7706	83.7706	83.7706	84.2265	84.5684	110.264	111.594	113.811	115.733	117.654	119.428	120.758	122.384	125.932	128.001	130.218	133.026	137.904	141.451	148.694
87, 2-3 Tihany (Óvár)		166.003	164.293	162.412	162.071	157.455	152.839	149.078	145.487	140.188	137.452	138.307	134.375	131.981	128.733	124.63	123.262	122.408	121.724	120.356	118.476	119.501	119.501	118.134	119.672	122.579	122.066	122.921	124.459	125.656	125.656	125.656	126.34	126.853	165.396	167.392	170.717	173.599	176.482	179.142	181.138	183.576	188.897	192.001	195.327	199.54	206.856	212.177	223.041
86, 2-3 Tihany (Diós)		0	0	0	0	0	0	0	0	0	0	0	0	0	0	0	0	0	0	0	0	0	0	0	0	0	0	0	0	0	0	0	0	0	0	0	0	0	0	0	0	0	0	0	0	0	0	0	0
86, 1-2 Tihany (Diós)		0	0	0	0	0	0	0	0	0	0	0	0	0	0	0	0	0	0	0	0	0	0	0	0	0	0	0	0	0	0	0	0	0	0	0	0	0	0	0	0	0	0	0	0	0	0	0	0
88-89, 2-3 Balatonfüred		221.337	219.057	216.55	216.094	209.939	203.785	198.77	193.983	186.917	183.27	184.409	179.167	175.975	171.644	166.174	164.35	163.21	162.298	160.475	157.967	159.335	159.335	157.512	159.563	163.438	162.754	163.894	165.946	167.541	167.541	167.541	168.453	169.137	220.528	223.189	227.623	231.466	235.309	238.856	241.517	244.769	251.863	256.002	260.436	266.053	275.808	282.903	297.388
89, 1-2 Balatonfüred		553.342	547.643	541.375	540.235	524.849	509.462	496.925	484.958	467.292	458.174	461.023	447.916	439.938	429.111	415.434	410.875	408.026	405.746	401.187	394.919	398.338	398.338	393.779	398.908	408.596	406.886	409.735	414.864	418.853	418.853	418.853	421.133	422.842	551.32	557.972	569.057	578.665	588.272	597.141	603.792	611.921	629.658	640.005	651.09	665.132	689.52	707.257	743.47
91-92, 2-2-3 Csopak		248.235	244.815	241.054	240.37	231.139	221.907	214.384	207.204	196.605	191.134	192.843	184.979	180.192	173.696	165.49	162.754	161.045	159.677	156.942	153.181	155.232	155.232	152.497	155.574	161.387	160.361	162.071	165.148	167.541	167.541	167.541	168.909	169.935	222.154	226.145	232.796	238.561	244.325	249.646	253.637	258.515	269.157	275.365	282.016	290.441	305.074	315.716	337.444
92-93, 3-2-3 Alsóörs		165.49	163.21	160.703	160.247	154.092	147.938	142.923	138.136	131.07	127.423	128.562	123.319	120.128	115.797	110.326	108.503	107.363	106.451	104.628	102.12	103.488	103.488	101.664	103.716	107.591	106.907	108.047	110.099	111.694	111.694	111.694	112.606	113.29	148.103	150.763	155.197	159.04	162.883	166.431	169.091	172.343	179.438	183.576	188.011	193.627	203.383	210.477	224.962
93, 1-2 Alsóörs		0	0	0	0	0	0	0	0	0	0	0	0	0	0	0	0	0	0	0	0	0	0	0	0	0	0	0	0	0	0	0	0	0	0	0	0	0	0	0	0	0	0	0	0	0	0	0	0
95 Balatonalmádi		247.722	243.733	239.345	238.547	227.776	217.006	208.23	199.853	187.487	181.104	183.099	173.924	168.339	160.76	151.186	147.995	146	144.405	141.213	136.825	139.219	139.219	136.028	139.618	146.399	145.202	147.197	150.787	153.579	153.579	153.579	155.175	156.372	204.861	209.517	217.276	224.002	230.727	236.935	241.591	247.281	259.697	266.94	274.699	284.529	301.6	314.016	339.365
96-97, 1-2 Vörösberény		70.7776	69.6379	68.3842	68.1562	65.079	62.0017	59.4942	57.1008	53.5676	51.744	52.3139	49.6925	48.0969	45.9314	43.196	42.2842	41.7144	41.2585	40.3467	39.093	39.7768	39.7768	38.865	39.8908	41.8283	41.4864	42.0563	43.082	43.8799	43.8799	43.8799	44.3357	44.6777	58.5316	59.8619	62.079	64.0005	65.922	67.6956	69.0259	70.6518	74.1991	76.2684	78.4856	81.2939	86.1715	89.7189	96.9614
96-97,2-3 Budatava		389.277	383.008	376.113	374.859	357.934	341.009	327.218	314.054	294.622	284.592	287.726	273.309	264.533	252.623	237.578	232.563	229.429	226.922	221.907	215.011	218.772	218.772	213.758	219.399	230.056	228.175	231.31	236.951	241.339	241.339	241.339	243.847	245.727	321.924	329.24	341.434	352.003	362.571	372.326	379.642	388.585	408.095	419.476	431.671	447.116	473.943	493.454	533.288
98,2-3 Fűzfő, a Balaton sarka		39.3779	38.808	38.1812	38.0672	36.5286	34.9899	33.7362	32.5395	30.7729	29.8611	30.146	28.8353	28.0375	26.9548	25.5871	25.1312	24.8463	24.6183	24.1624	23.5356	23.8775	23.8775	23.4216	23.9345	24.9032	24.7323	25.0172	25.5301	25.929	25.929	25.929	26.157	26.3279	34.439	35.1042	36.2127	37.1735	38.1342	39.0211	39.6862	40.4991	42.2728	43.3075	44.416	45.8202	48.259	50.0327	53.654
99, 2-3 Fűzfő		0	0	0	0	0	0	0	0	0	0	0	0	0	0	0	0	0	0	0	0	0	0	0	0	0	0	0	0	0	0	0	0	0	0	0	0	0	0	0	0	0	0	0	0	0	0	0	0
102, 2-3 Balatonkenese		852.409	842.151	830.868	828.816	801.121	773.425	750.858	729.317	697.519	681.107	686.235	662.643	648.282	628.793	604.174	595.968	590.839	586.736	578.53	567.247	573.401	573.401	565.195	574.427	591.865	588.788	593.917	603.149	610.329	610.329	610.329	614.432	617.509	806.14	818.112	838.066	855.36	872.653	888.616	900.588	915.221	947.148	965.771	985.725	1011	1054.9	1086.83	1152.01
103, 2-3 Balatonkenese		236.78	233.931	230.797	230.227	222.534	214.84	208.572	202.588	193.755	189.196	190.621	184.067	180.078	174.665	167.826	165.547	164.122	162.982	160.703	157.569	159.278	159.278	156.999	159.563	164.407	163.552	164.977	167.541	169.536	169.536	169.536	170.676	171.53	223.928	227.253	232.796	237.6	242.404	246.838	250.163	254.228	263.097	268.27	273.813	280.833	293.028	301.896	320.002
104, 2-3 Akarattya		0	0	0	0	0	0	0	0	0	0	0	0	0	0	0	0	0	0	0	0	0	0	0	0	0	0	0	0	0	0	0	0	0	0	0	0	0	0	0	0	0	0	0	0	0	0	0	0
106, 1-2 Aliga		1572.15	1550.5	1526.68	1522.35	1463.88	1405.41	1357.77	1312.29	1245.16	1210.51	1221.34	1171.54	1141.22	1100.07	1048.1	1030.78	1019.95	1011.29	993.964	970.144	983.137	983.137	965.813	985.302	1022.12	1015.62	1026.45	1045.94	1061.09	1061.09	1061.09	1069.76	1076.25	1406.98	1432.25	1474.38	1510.88	1547.39	1581.09	1606.37	1637.26	1704.66	1743.98	1786.1	1839.46	1932.13	1999.53	2137.14
106, 2-3 Aliga		41.3724	40.8026	40.1757	40.0617	38.5231	36.9844	35.7307	34.534	32.7674	31.8556	32.1406	30.8299	30.0321	28.9493	27.5816	27.1257	26.8408	26.6128	26.157	25.5301	25.872	25.872	25.4161	25.929	26.8978	26.7268	27.0118	27.5246	27.9235	27.9235	27.9235	28.1515	28.3225	37.0257	37.6908	38.7994	39.7601	40.7208	41.6077	42.2728	43.0858	44.8594	45.8941	47.0026	48.4068	50.8456	52.6193	56.2406
108,1-2 Balatonszentgyörgy		0	0	0	0	0	0	0	0	0	0	0	0	0	0	0	0	0	0	0	0	0	0	0	0	0	0	0	0	0	0	0	0	0	0	0	0	0	0	0	0	0	0	0	0	0	0	0	0
110, 1-2 Balatonberény		498.977	492.708	485.813	484.559	467.634	450.709	436.918	423.754	404.322	394.292	397.426	383.008	374.232	362.322	347.278	342.263	339.129	336.621	331.606	324.711	328.472	328.472	323.457	329.099	339.755	337.875	341.009	346.651	351.039	351.039	351.039	353.546	355.427	464.188	471.505	483.699	494.267	504.835	514.59	521.907	530.849	550.36	561.741	573.935	589.381	616.208	635.718	675.552
111,1 Balatonberény		136.085	134.375	132.494	132.152	127.537	122.921	119.159	115.569	110.27	107.534	108.389	104.457	102.063	98.8152	94.7121	93.3444	92.4896	91.8058	90.4381	88.5575	89.5833	89.5833	88.2156	89.7542	92.6606	92.1477	93.0025	94.5411	95.7379	95.7379	95.7379	96.4217	96.9346	126.597	128.592	131.918	134.8	137.682	140.343	142.338	144.777	150.098	153.202	156.528	160.74	168.057	173.378	184.242
112, 1-2 Balatonmáriafürdő		33.3943	32.8244	32.1976	32.0836	30.5449	29.0063	27.7526	26.5559	24.7893	23.8775	24.1624	22.8517	22.0539	20.9712	19.6035	19.1476	18.8626	18.6347	18.1788	17.5519	17.8939	17.8939	17.438	17.9508	18.9196	18.7487	19.0336	19.5465	19.9454	19.9454	19.9454	20.1733	20.3443	26.6792	27.3443	28.4529	29.4136	30.3744	31.2612	31.9263	32.7393	34.513	35.5476	36.6562	38.0603	40.4991	42.2728	45.8941
113, 1-2 Balatonmáriafürdő		0	0	0	0	0	0	0	0	0	0	0	0	0	0	0	0	0	0	0	0	0	0	0	0	0	0	0	0	0	0	0	0	0	0	0	0	0	0	0	0	0	0	0	0	0	0	0	0
114, 1-2 Balatonmáriafürdő		133.577	131.298	128.79	128.334	122.18	116.025	111.01	106.223	99.1571	95.5099	96.6497	91.4069	88.2156	83.8846	78.4139	76.5903	75.4506	74.5388	72.7152	70.2078	71.5755	71.5755	69.7519	71.8034	75.6785	74.9947	76.1344	78.1859	79.7816	79.7816	79.7816	80.6933	81.3772	106.717	109.377	113.811	117.654	121.497	125.045	127.705	130.957	138.052	142.19	146.625	152.241	161.997	169.091	183.576
115, 1-2 Balatonfenyves		267.154	262.595	257.58	256.669	244.359	232.05	222.021	212.447	198.314	191.02	193.299	182.814	176.431	167.769	156.828	153.181	150.901	149.078	145.43	140.416	143.151	143.151	139.504	143.607	151.357	149.989	152.269	156.372	159.563	159.563	159.563	161.387	162.754	213.433	218.754	227.623	235.309	242.995	250.09	255.411	261.914	276.104	284.381	293.249	304.483	323.993	338.183	367.153
116, 1-2 Balatonfenyves		267.154	262.595	257.58	256.669	244.359	232.05	222.021	212.447	198.314	191.02	193.299	182.814	176.431	167.769	156.828	153.181	150.901	149.078	145.43	140.416	143.151	143.151	139.504	143.607	151.357	149.989	152.269	156.372	159.563	159.563	159.563	161.387	162.754	213.433	218.754	227.623	235.309	242.995	250.09	255.411	261.914	276.104	284.381	293.249	304.483	323.993	338.183	367.153
117, 1-2 Balatonfenyves		100.183	98.4732	96.5927	96.2507	91.6348	87.0189	83.2577	79.6676	74.3678	71.6324	72.4872	68.5551	66.1617	62.9135	58.8104	57.4427	56.5879	55.9041	54.5364	52.6558	53.6816	53.6816	52.3139	53.8525	56.7589	56.246	57.1008	58.6394	59.8362	59.8362	59.8362	60.52	61.0329	80.0375	82.0329	85.3586	88.2408	91.1231	93.7836	95.779	98.2178	103.539	106.643	109.968	114.181	121.497	126.818	137.682
118, 1-2 Bélatelep		33.3943	32.8244	32.1976	32.0836	30.5449	29.0063	27.7526	26.5559	24.7893	23.8775	24.1624	22.8517	22.0539	20.9712	19.6035	19.1476	18.8626	18.6347	18.1788	17.5519	17.8939	17.8939	17.438	17.9508	18.9196	18.7487	19.0336	19.5465	19.9454	19.9454	19.9454	20.1733	20.3443	26.6792	27.3443	28.4529	29.4136	30.3744	31.2612	31.9263	32.7393	34.513	35.5476	36.6562	38.0603	40.4991	42.2728	45.8941
119, 1-2 Fonyód		0	0	0	0	0	0	0	0	0	0	0	0	0	0	0	0	0	0	0	0	0	0	0	0	0	0	0	0	0	0	0	0	0	0	0	0	0	0	0	0	0	0	0	0	0	0	0	0
120, 2-3 Fonyód		0	0	0	0	0	0	0	0	0	0	0	0	0	0	0	0	0	0	0	0	0	0	0	0	0	0	0	0	0	0	0	0	0	0	0	0	0	0	0	0	0	0	0	0	0	0	0	0
121, 1-2 Balatonboglár		0	0	0	0	0	0	0	0	0	0	0	0	0	0	0	0	0	0	0	0	0	0	0	0	0	0	0	0	0	0	0	0	0	0	0	0	0	0	0	0	0	0	0	0	0	0	0	0
122, 1-2 Balatonboglár		133.577	131.298	128.79	128.334	122.18	116.025	111.01	106.223	99.1571	95.5099	96.6497	91.4069	88.2156	83.8846	78.4139	76.5903	75.4506	74.5388	72.7152	70.2078	71.5755	71.5755	69.7519	71.8034	75.6785	74.9947	76.1344	78.1859	79.7816	79.7816	79.7816	80.6933	81.3772	106.717	109.377	113.811	117.654	121.497	125.045	127.705	130.957	138.052	142.19	146.625	152.241	161.997	169.091	183.576
123, 1-2 Balatonboglár		467.52	459.542	450.766	449.17	427.629	406.088	388.536	371.782	347.05	334.285	338.274	319.924	308.755	293.596	274.449	268.066	264.077	260.886	254.503	245.727	250.514	250.514	244.132	251.312	264.875	262.481	266.47	273.651	279.235	279.235	279.235	282.427	284.82	373.508	382.82	398.34	411.79	425.241	437.657	446.969	458.35	483.181	497.666	513.186	532.844	566.988	591.82	642.517
124, 1-2 Balatonlelle		200.366	196.946	193.185	192.501	183.27	174.038	166.515	159.335	148.736	143.265	144.974	137.11	132.323	125.827	117.621	114.885	113.176	111.808	109.073	105.312	107.363	107.363	104.628	107.705	113.518	112.492	114.202	117.279	119.672	119.672	119.672	121.04	122.066	160.075	164.066	170.717	176.482	182.246	187.567	191.558	196.436	207.078	213.286	219.937	228.362	242.995	253.637	275.365
125, 1-2 Balatonlelle		133.577	131.298	128.79	128.334	122.18	116.025	111.01	106.223	99.1571	95.5099	96.6497	91.4069	88.2156	83.8846	78.4139	76.5903	75.4506	74.5388	72.7152	70.2078	71.5755	71.5755	69.7519	71.8034	75.6785	74.9947	76.1344	78.1859	79.7816	79.7816	79.7816	80.6933	81.3772	106.717	109.377	113.811	117.654	121.497	125.045	127.705	130.957	138.052	142.19	146.625	152.241	161.997	169.091	183.576
126, 2-3 Balatonszemes		133.577	131.298	128.79	128.334	122.18	116.025	111.01	106.223	99.1571	95.5099	96.6497	91.4069	88.2156	83.8846	78.4139	76.5903	75.4506	74.5388	72.7152	70.2078	71.5755	71.5755	69.7519	71.8034	75.6785	74.9947	76.1344	78.1859	79.7816	79.7816	79.7816	80.6933	81.3772	106.717	109.377	113.811	117.654	121.497	125.045	127.705	130.957	138.052	142.19	146.625	152.241	161.997	169.091	183.576
127, 1-2 Balatonöszöd		133.577	131.298	128.79	128.334	122.18	116.025	111.01	106.223	99.1571	95.5099	96.6497	91.4069	88.2156	83.8846	78.4139	76.5903	75.4506	74.5388	72.7152	70.2078	71.5755	71.5755	69.7519	71.8034	75.6785	74.9947	76.1344	78.1859	79.7816	79.7816	79.7816	80.6933	81.3772	106.717	109.377	113.811	117.654	121.497	125.045	127.705	130.957	138.052	142.19	146.625	152.241	161.997	169.091	183.576
128, 1-2 Balatonszárszó		233.76	229.771	225.383	224.585	213.815	203.044	194.268	185.891	173.525	167.142	169.137	159.962	154.377	146.798	137.224	134.033	132.038	130.443	127.252	122.864	125.257	125.257	122.066	125.656	132.437	131.241	133.235	136.825	139.618	139.618	139.618	141.213	142.41	186.754	191.41	199.17	205.895	212.62	218.828	223.484	229.175	241.591	248.833	256.593	266.422	283.494	295.91	321.259
129, 1-2 Balatonszárszó		968.434	951.908	933.729	930.424	885.803	841.183	804.825	770.12	718.889	692.447	700.71	662.7	639.563	608.163	568.501	555.28	547.017	540.406	527.185	509.006	518.922	518.922	505.701	520.575	548.669	543.711	551.974	566.848	578.416	578.416	578.416	585.027	589.985	773.696	792.985	825.133	852.995	880.856	906.575	925.863	949.439	1000.88	1030.88	1063.03	1103.75	1174.47	1225.91	1330.93
132, 1-2 Balatonföldvár		233.76	229.771	225.383	224.585	213.815	203.044	194.268	185.891	173.525	167.142	169.137	159.962	154.377	146.798	137.224	134.033	132.038	130.443	127.252	122.864	125.257	125.257	122.066	125.656	132.437	131.241	133.235	136.825	139.618	139.618	139.618	141.213	142.41	186.754	191.41	199.17	205.895	212.62	218.828	223.484	229.175	241.591	248.833	256.593	266.422	283.494	295.91	321.259
133, 1-2 Szántód		66.7886	65.6488	64.3951	64.1672	61.0899	58.0126	55.5052	53.1117	49.5785	47.755	48.3248	45.7034	44.1078	41.9423	39.2069	38.2951	37.7253	37.2694	36.3576	35.1039	35.7877	35.7877	34.8759	35.9017	37.8393	37.4973	38.0672	39.093	39.8908	39.8908	39.8908	40.3467	40.6886	53.3584	54.6886	56.9057	58.8272	60.7487	62.5224	63.8527	65.4785	69.0259	71.0952	73.3123	76.1206	80.9983	84.5456	91.7882
134, 1-2 Szántód		367.337	361.069	354.173	352.919	335.994	319.069	305.278	292.114	272.682	262.652	265.787	251.369	242.593	230.683	215.638	210.623	207.489	204.982	199.967	193.071	196.832	196.832	191.818	197.459	208.116	206.235	209.37	215.011	219.399	219.399	219.399	221.907	223.787	293.471	300.787	312.981	323.55	334.118	343.873	351.19	360.132	379.642	391.024	403.218	418.664	445.491	465.001	504.835
135, 1-2 Zamárdi		0	0	0	0	0	0	0	0	0	0	0	0	0	0	0	0	0	0	0	0	0	0	0	0	0	0	0	0	0	0	0	0	0	0	0	0	0	0	0	0	0	0	0	0	0	0	0	0
136, 1-2 Zamárdi		166.971	164.122	160.988	160.418	152.725	145.031	138.763	132.779	123.946	119.387	120.812	114.259	110.27	104.856	98.0173	95.7379	94.3132	93.1735	90.894	87.7597	89.4693	89.4693	87.1898	89.7542	94.5981	93.7433	95.168	97.7324	99.7269	99.7269	99.7269	100.867	101.721	133.396	136.722	142.264	147.068	151.872	156.306	159.632	163.696	172.565	177.738	183.281	190.302	202.496	211.364	229.47
137, 1-2 Zamárdi		66.7886	65.6488	64.3951	64.1672	61.0899	58.0126	55.5052	53.1117	49.5785	47.755	48.3248	45.7034	44.1078	41.9423	39.2069	38.2951	37.7253	37.2694	36.3576	35.1039	35.7877	35.7877	34.8759	35.9017	37.8393	37.4973	38.0672	39.093	39.8908	39.8908	39.8908	40.3467	40.6886	53.3584	54.6886	56.9057	58.8272	60.7487	62.5224	63.8527	65.4785	69.0259	71.0952	73.3123	76.1206	80.9983	84.5456	91.7882
138, 1-2 Siófok		267.154	262.595	257.58	256.669	244.359	232.05	222.021	212.447	198.314	191.02	193.299	182.814	176.431	167.769	156.828	153.181	150.901	149.078	145.43	140.416	143.151	143.151	139.504	143.607	151.357	149.989	152.269	156.372	159.563	159.563	159.563	161.387	162.754	213.433	218.754	227.623	235.309	242.995	250.09	255.411	261.914	276.104	284.381	293.249	304.483	323.993	338.183	367.153
139, 1-2 Siófok beton a 142-be mérve		0	0	0	0	0	0	0	0	0	0	0	0	0	0	0	0	0	0	0	0	0	0	0	0	0	0	0	0	0	0	0	0	0	0	0	0	0	0	0	0	0	0	0	0	0	0	0	0
142, 1-2 Siófok beton a 139-ről is ide mérve		0	0	0	0	0	0	0	0	0	0	0	0	0	0	0	0	0	0	0	0	0	0	0	0	0	0	0	0	0	0	0	0	0	0	0	0	0	0	0	0	0	0	0	0	0	0	0	0
143, Siófok		0	0	0	0	0	0	0	0	0	0	0	0	0	0	0	0	0	0	0	0	0	0	0	0	0	0	0	0	0	0	0	0	0	0	0	0	0	0	0	0	0	0	0	0	0	0	0	0
144, 1-2 Siófok		200.366	196.946	193.185	192.501	183.27	174.038	166.515	159.335	148.736	143.265	144.974	137.11	132.323	125.827	117.621	114.885	113.176	111.808	109.073	105.312	107.363	107.363	104.628	107.705	113.518	112.492	114.202	117.279	119.672	119.672	119.672	121.04	122.066	160.075	164.066	170.717	176.482	182.246	187.567	191.558	196.436	207.078	213.286	219.937	228.362	242.995	253.637	275.365
145, 1-2 Siófok		413.724	408.026	401.757	400.617	385.231	369.844	357.307	345.34	327.674	318.556	321.406	308.299	300.321	289.493	275.816	271.257	268.408	266.128	261.57	255.301	258.72	258.72	254.161	259.29	268.978	267.268	270.118	275.246	279.235	279.235	279.235	281.515	283.225	370.257	376.908	387.994	397.601	407.208	416.077	422.728	430.858	448.594	458.941	470.026	484.068	508.456	526.193	562.406
146, 2-3 Siófok		992.938	979.262	964.217	961.482	924.554	887.627	857.538	828.816	786.418	764.535	771.374	739.917	720.769	694.783	661.959	651.017	644.179	638.708	627.767	612.722	620.928	620.928	609.987	622.296	645.547	641.444	648.282	660.591	670.165	670.165	670.165	675.636	679.739	888.616	904.579	931.185	954.242	977.3	998.585	1014.55	1034.06	1076.63	1101.46	1128.06	1161.76	1220.3	1262.86	1349.77
147, 1-2 Balatonvilágos		1406.66	1387.29	1365.97	1362.1	1309.79	1257.47	1214.85	1174.16	1114.09	1083.09	1092.78	1048.22	1021.09	984.276	937.775	922.275	912.587	904.837	889.336	868.023	879.649	879.649	864.148	881.586	914.525	908.712	918.4	935.838	949.4	949.4	949.4	957.151	962.963	1258.87	1281.49	1319.18	1351.84	1384.51	1414.66	1437.28	1464.92	1525.22	1560.4	1598.09	1645.83	1728.75	1789.06	1912.18
148, 1-2 Balatonvilágos		579.214	571.236	562.46	560.864	539.323	517.782	500.23	483.476	458.744	445.979	449.968	431.618	420.449	405.29	386.143	379.76	375.771	372.58	366.197	357.421	362.208	362.208	355.826	363.006	376.569	374.175	378.165	385.345	390.93	390.93	390.93	394.121	396.514	518.359	527.671	543.191	556.641	570.092	582.508	591.82	603.201	628.032	642.517	658.037	677.695	711.839	736.67	787.368
148, 2-3 Balatonvilágos		165.49	163.21	160.703	160.247	154.092	147.938	142.923	138.136	131.07	127.423	128.562	123.319	120.128	115.797	110.326	108.503	107.363	106.451	104.628	102.12	103.488	103.488	101.664	103.716	107.591	106.907	108.047	110.099	111.694	111.694	111.694	112.606	113.29	148.103	150.763	155.197	159.04	162.883	166.431	169.091	172.343	179.438	183.576	188.011	193.627	203.383	210.477	224.962
Pier Pile	SUM	17404.3	17162.7	16896.9	16848.6	16196.2	15543.8	15012.2	14504.8	13755.8	13369.2	13490	12934.2	12596	12136.9	11557	11363.7	11242.9	11146.2	10952.9	10687.1	10832.1	10832.1	10638.8	10856.3	11267	11194.5	11315.4	11532.8	11702	11702	11702	11798.6	11871.1	15520.4	15802.4	16272.4	16679.8	17087.2	17463.2	17745.2	18089.9	18841.9	19280.6	19750.6	20346	21380.1	22132.1	23667.5
Concrete wall
	Date	05.2003.	05.2003.	06.2003.	06.2003.	06.2003.	06.2003.	07.2003.	07.2003.	07.2003.	07.2003.	07.2003.	08.2003.	08.2003.	08.2003.	08.2003.	09.2003.	09.2003.	09.2003.	09.2003.	09.2003.	10.2003.	10.2003.	10.2003.	10.2003.	11.2003.	11.2003.	11.2003.	11.2003.	12.2003.	12.2003.	12.2003.	12.2003.	12.2003.	01.2004.	01.2004.	01.2004.	01.2004.	02.2004.	02.2004.	02.2004.	02.2004.	03.2004.	03.2004.	03.2004.	03.2004.	03.2004.	04.2004.	04.2004.
	Water Level	63.7143	62.2857	60.7143	60.4286	56.5714	52.7143	49.5714	46.5714	42.1429	39.8571	40.5714	37.2857	35.2857	32.5714	29.1429	28	27.2857	26.7143	25.5714	24	24.8571	24.8571	23.7143	25	27.4286	27	27.7143	29	30	30	30	30.5714	31	31.5714	32.8571	35	36.8571	38.7143	40.4286	41.7143	43.2857	46.7143	48.7143	50.8571	53.5714	58.2857	61.7143	68.7143
Number of the ortophoto, region
53 Zala torok		0	0	0	0	0	0	0	0	0	0	0	0	0	0	0	0	0	0	0	0	0	0	0	0	0	0	0	0	0	0	0	0	0	0	0	0	0	0	0	0	0	0	0	0	0	0	0	0
55, 3 Keszthely		0	0	0	0	0	0	0	0	0	0	0	0	0	0	0	0	0	0	0	0	0	0	0	0	0	0	0	0	0	0	0	0	0	0	0	0	0	0	0	0	0	0	0	0	0	0	0	0
55, 1-2 Keszthely		803.499	798.974	793.998	793.093	780.878	768.662	758.709	749.208	735.183	727.944	730.207	719.801	713.467	704.871	694.013	690.394	688.131	686.322	682.702	677.726	680.44	680.44	676.821	680.893	688.584	687.227	689.489	693.56	696.727	696.727	696.727	698.537	699.894	910.007	915.288	924.088	931.716	939.343	946.384	951.664	958.118	972.2	980.414	989.215	1000.36	1019.72	1033.81	1062.55
57, 2-3 Keszthely		1526.42	1517.82	1508.37	1506.65	1483.44	1460.24	1441.33	1423.28	1396.64	1382.89	1387.18	1367.42	1355.38	1339.05	1318.43	1311.55	1307.25	1303.81	1296.94	1287.48	1292.64	1292.64	1285.77	1293.5	1308.11	1305.53	1309.83	1317.57	1323.58	1323.58	1323.58	1327.02	1329.6	1728.75	1738.78	1755.5	1769.99	1784.48	1797.86	1807.89	1820.15	1846.9	1862.51	1879.22	1900.4	1937.18	1963.93	2018.55
58 + 59, 2-3 Gyenesdiás		1082.08	1075.98	1069.28	1068.06	1051.61	1035.16	1021.76	1008.96	990.075	980.326	983.373	969.359	960.829	949.253	934.631	929.756	926.71	924.273	919.399	912.697	916.352	916.352	911.478	916.962	927.319	925.491	928.538	934.021	938.286	938.286	938.286	940.723	942.551	1225.51	1232.62	1244.47	1254.75	1265.02	1274.5	1281.61	1290.3	1309.27	1320.33	1332.18	1347.19	1373.27	1392.23	1430.95
60, 2-3 Vonyarcvashegy		957.752	952.359	946.427	945.349	930.788	916.228	904.364	893.039	876.321	867.693	870.389	857.986	850.436	840.19	827.247	822.933	820.237	818.08	813.766	807.834	811.069	811.069	806.755	811.609	820.776	819.158	821.855	826.708	830.483	830.483	830.483	832.64	834.258	1084.71	1091	1101.49	1110.58	1119.68	1128.07	1134.36	1142.06	1158.84	1168.63	1179.12	1192.41	1215.49	1232.27	1266.54
61, 1-2-3 Balatongyörök		867.963	863.076	857.7	856.722	843.527	830.331	819.58	809.317	794.166	786.347	788.79	777.55	770.708	761.422	749.693	745.783	743.34	741.385	737.475	732.099	735.032	735.032	731.122	735.52	743.828	742.362	744.806	749.204	752.625	752.625	752.625	754.58	756.046	983.016	988.72	998.227	1006.47	1014.71	1022.31	1028.02	1034.99	1050.2	1059.07	1068.58	1080.62	1101.54	1116.75	1147.8
62 + 63, 2-3 Balatongyörök, alulról a 3. utcától délre, kis maradék rész		0	0	0	0	0	0	0	0	0	0	0	0	0	0	0	0	0	0	0	0	0	0	0	0	0	0	0	0	0	0	0	0	0	0	0	0	0	0	0	0	0	0	0	0	0	0	0	0
63, 1-2 Afrikapark		276.275	274.719	273.008	272.697	268.497	264.296	260.874	257.607	252.785	250.296	251.074	247.496	245.318	242.363	238.629	237.385	236.607	235.985	234.74	233.029	233.962	233.962	232.718	234.118	236.762	236.296	237.073	238.474	239.562	239.562	239.562	240.185	240.651	312.896	314.712	317.738	320.361	322.983	325.404	327.22	329.439	334.281	337.105	340.131	343.964	350.622	355.463	365.348
64 + 65 Balatoneerics		0	0	0	0	0	0	0	0	0	0	0	0	0	0	0	0	0	0	0	0	0	0	0	0	0	0	0	0	0	0	0	0	0	0	0	0	0	0	0	0	0	0	0	0	0	0	0	0
66, 2-3 Szigliget		527.224	524.255	520.99	520.396	512.381	504.366	497.835	491.601	482.398	477.648	479.133	472.305	468.149	462.508	455.384	453.009	451.525	450.337	447.962	444.697	446.478	446.478	444.103	446.775	451.822	450.931	452.415	455.087	457.165	457.165	457.165	458.352	459.243	597.111	600.575	606.35	611.355	616.36	620.98	624.445	628.679	637.919	643.309	649.084	656.398	669.103	678.342	697.207
67, 2-3 Szigliget - Balatontördemic, óriási hajdani nádas és lápvidék		0	0	0	0	0	0	0	0	0	0	0	0	0	0	0	0	0	0	0	0	0	0	0	0	0	0	0	0	0	0	0	0	0	0	0	0	0	0	0	0	0	0	0	0	0	0	0	0
68, 2-3 Badacsony		0	0	0	0	0	0	0	0	0	0	0	0	0	0	0	0	0	0	0	0	0	0	0	0	0	0	0	0	0	0	0	0	0	0	0	0	0	0	0	0	0	0	0	0	0	0	0	0
69, 1-2 Badacsony		1542.53	1533.85	1524.29	1522.56	1499.11	1475.66	1456.55	1438.31	1411.38	1397.49	1401.83	1381.85	1369.69	1353.19	1332.35	1325.4	1321.05	1317.58	1310.63	1301.08	1306.29	1306.29	1299.34	1307.16	1321.92	1319.32	1323.66	1331.48	1337.56	1337.56	1337.56	1341.03	1343.64	1747	1757.14	1774.04	1788.68	1803.32	1816.84	1826.98	1839.37	1866.4	1882.17	1899.07	1920.47	1957.64	1984.67	2039.86
72, 2-3 Badacsonyörs		92.0915	91.573	91.0026	90.8989	89.4989	88.0988	86.9581	85.8691	84.2617	83.432	83.6913	82.4987	81.7727	80.7875	79.543	79.1282	78.8689	78.6615	78.2467	77.6763	77.9874	77.9874	77.5726	78.0393	78.9208	78.7652	79.0245	79.4912	79.8541	79.8541	79.8541	80.0616	80.2171	104.299	104.904	105.913	106.787	107.661	108.468	109.073	109.813	111.427	112.368	113.377	114.655	116.874	118.488	121.783
73, 1-2 Ábrahámhegy		610.106	606.671	602.892	602.205	592.93	583.655	576.097	568.883	558.234	552.737	554.455	546.554	541.744	535.217	526.973	524.224	522.507	521.133	518.384	514.606	516.667	516.667	513.918	517.01	522.85	521.82	523.537	526.629	529.034	529.034	529.034	530.408	531.438	690.98	694.989	701.672	707.463	713.255	718.601	722.61	727.511	738.203	744.44	751.123	759.587	774.289	784.981	806.811
73, 2-3 Ábrahámhegy		0	0	0	0	0	0	0	0	0	0	0	0	0	0	0	0	0	0	0	0	0	0	0	0	0	0	0	0	0	0	0	0	0	0	0	0	0	0	0	0	0	0	0	0	0	0	0	0
74, 2-3 Kővágóörs		0	0	0	0	0	0	0	0	0	0	0	0	0	0	0	0	0	0	0	0	0	0	0	0	0	0	0	0	0	0	0	0	0	0	0	0	0	0	0	0	0	0	0	0	0	0	0	0
75, 2-3 Révfülöp		1128.12	1121.77	1114.78	1113.51	1096.36	1079.21	1065.24	1051.9	1032.21	1022.04	1025.22	1010.61	1001.72	989.647	974.402	969.32	966.144	963.604	958.522	951.535	955.346	955.346	950.264	955.981	966.78	964.874	968.05	973.767	978.213	978.213	978.213	980.754	982.66	1277.66	1285.07	1297.43	1308.14	1318.85	1328.73	1336.15	1345.21	1364.98	1376.51	1388.87	1404.52	1431.7	1451.47	1491.84
76, 2-3 Balatonszepezd		276.275	274.719	273.008	272.697	268.497	264.296	260.874	257.607	252.785	250.296	251.074	247.496	245.318	242.363	238.629	237.385	236.607	235.985	234.74	233.029	233.962	233.962	232.718	234.118	236.762	236.296	237.073	238.474	239.562	239.562	239.562	240.185	240.651	312.896	314.712	317.738	320.361	322.983	325.404	327.22	329.439	334.281	337.105	340.131	343.964	350.622	355.463	365.348
77, 1-2 Balatonszepezd		0	0	0	0	0	0	0	0	0	0	0	0	0	0	0	0	0	0	0	0	0	0	0	0	0	0	0	0	0	0	0	0	0	0	0	0	0	0	0	0	0	0	0	0	0	0	0	0
78, 2-3 Zánka		0	0	0	0	0	0	0	0	0	0	0	0	0	0	0	0	0	0	0	0	0	0	0	0	0	0	0	0	0	0	0	0	0	0	0	0	0	0	0	0	0	0	0	0	0	0	0	0
79, 2-3 Vérkút		789.685	785.239	780.347	779.458	767.453	755.447	745.665	736.328	722.544	715.43	717.653	707.426	701.201	692.753	682.081	678.524	676.301	674.523	670.965	666.074	668.742	668.742	665.185	669.187	676.746	675.412	677.635	681.637	684.749	684.749	684.749	686.528	687.862	894.362	899.552	908.201	915.698	923.194	930.114	935.303	941.646	955.486	963.559	972.208	983.164	1002.19	1016.03	1044.29
80, 2-3 Balatonakali		0	0	0	0	0	0	0	0	0	0	0	0	0	0	0	0	0	0	0	0	0	0	0	0	0	0	0	0	0	0	0	0	0	0	0	0	0	0	0	0	0	0	0	0	0	0	0	0
81, 2-3 Balatonakali		0	0	0	0	0	0	0	0	0	0	0	0	0	0	0	0	0	0	0	0	0	0	0	0	0	0	0	0	0	0	0	0	0	0	0	0	0	0	0	0	0	0	0	0	0	0	0	0
82, 2-3 Balatonudvari		0	0	0	0	0	0	0	0	0	0	0	0	0	0	0	0	0	0	0	0	0	0	0	0	0	0	0	0	0	0	0	0	0	0	0	0	0	0	0	0	0	0	0	0	0	0	0	0
83, 2-3 Örvényes		0	0	0	0	0	0	0	0	0	0	0	0	0	0	0	0	0	0	0	0	0	0	0	0	0	0	0	0	0	0	0	0	0	0	0	0	0	0	0	0	0	0	0	0	0	0	0	0
84, 1-2 Tihany		0	0	0	0	0	0	0	0	0	0	0	0	0	0	0	0	0	0	0	0	0	0	0	0	0	0	0	0	0	0	0	0	0	0	0	0	0	0	0	0	0	0	0	0	0	0	0	0
85, 2-3 Tihany		1208.7	1201.9	1194.41	1193.05	1174.67	1156.3	1141.32	1127.03	1105.93	1095.05	1098.45	1082.8	1073.27	1060.34	1044	1038.56	1035.15	1032.43	1026.99	1019.5	1023.58	1023.58	1018.14	1024.27	1035.84	1033.79	1037.2	1043.32	1048.09	1048.09	1048.09	1050.81	1052.85	1368.92	1376.87	1390.1	1401.58	1413.05	1423.64	1431.59	1441.3	1462.48	1474.83	1488.07	1504.84	1533.97	1555.15	1598.4
85, 1-2 Tihany		92.0915	91.573	91.0026	90.8989	89.4989	88.0988	86.9581	85.8691	84.2617	83.432	83.6913	82.4987	81.7727	80.7875	79.543	79.1282	78.8689	78.6615	78.2467	77.6763	77.9874	77.9874	77.5726	78.0393	78.9208	78.7652	79.0245	79.4912	79.8541	79.8541	79.8541	80.0616	80.2171	104.299	104.904	105.913	106.787	107.661	108.468	109.073	109.813	111.427	112.368	113.377	114.655	116.874	118.488	121.783
87, 2-3 Tihany (Óvár)		460.458	457.865	455.013	454.495	447.494	440.494	434.79	429.346	421.308	417.16	418.456	412.493	408.864	403.938	397.715	395.641	394.345	393.308	391.233	388.382	389.937	389.937	387.863	390.196	394.604	393.826	395.122	397.456	399.271	399.271	399.271	400.308	401.086	521.494	524.52	529.564	533.935	538.306	542.34	545.366	549.065	557.134	561.842	566.885	573.274	584.369	592.439	608.914
86, 2-3 Tihany (Diós)		0	0	0	0	0	0	0	0	0	0	0	0	0	0	0	0	0	0	0	0	0	0	0	0	0	0	0	0	0	0	0	0	0	0	0	0	0	0	0	0	0	0	0	0	0	0	0	0
86, 1-2 Tihany (Diós)		1220.21	1213.34	1205.78	1204.41	1185.86	1167.31	1152.19	1137.77	1116.47	1105.47	1108.91	1093.11	1083.49	1070.43	1053.95	1048.45	1045.01	1042.27	1036.77	1029.21	1033.33	1033.33	1027.84	1034.02	1045.7	1043.64	1047.07	1053.26	1058.07	1058.07	1058.07	1060.82	1062.88	1381.96	1389.98	1403.34	1414.93	1426.51	1437.2	1445.22	1455.02	1476.41	1488.88	1502.25	1519.17	1548.58	1569.96	1613.62
88-89, 2-3 Balatonfüred		5944.51	5911.04	5874.22	5867.52	5777.15	5686.78	5613.14	5542.85	5439.09	5385.54	5402.27	5325.29	5278.43	5214.83	5134.5	5107.73	5090.99	5077.6	5050.82	5014.01	5034.09	5034.09	5007.31	5037.44	5094.34	5084.3	5101.03	5131.16	5154.59	5154.59	5154.59	5167.97	5178.02	6732.49	6771.55	6836.67	6893.09	6949.52	7001.61	7040.68	7088.43	7192.61	7253.38	7318.49	7400.96	7544.21	7648.38	7861.08
89, 1-2 Balatonfüred		1450.44	1442.27	1433.29	1431.66	1409.61	1387.56	1369.59	1352.44	1327.12	1314.05	1318.14	1299.35	1287.92	1272.4	1252.8	1246.27	1242.19	1238.92	1232.39	1223.4	1228.3	1228.3	1221.77	1229.12	1243	1240.55	1244.64	1251.99	1257.7	1257.7	1257.7	1260.97	1263.42	1642.71	1652.24	1668.13	1681.89	1695.66	1708.37	1717.9	1729.55	1754.97	1769.8	1785.69	1805.81	1840.76	1866.18	1918.08
91-92, 2-2-3 Csopak		766.662	762.345	757.597	756.733	745.078	733.423	723.926	714.861	701.479	694.572	696.73	686.801	680.758	672.556	662.196	658.742	656.584	654.857	651.404	646.655	649.245	649.245	645.792	649.677	657.016	655.721	657.879	661.764	664.786	664.786	664.786	666.512	667.808	868.288	873.326	881.723	889.001	896.279	902.997	908.035	914.193	927.629	935.466	943.864	954.5	972.975	986.41	1013.84
92-93, 3-2-3 Alsóörs		2276.96	2264.14	2250.04	2247.48	2212.86	2178.24	2150.04	2123.11	2083.37	2062.86	2069.27	2039.78	2021.83	1997.47	1966.7	1956.44	1950.03	1944.91	1934.65	1920.55	1928.24	1928.24	1917.98	1929.52	1951.32	1947.47	1953.88	1965.42	1974.39	1974.39	1974.39	1979.52	1983.37	2578.79	2593.75	2618.69	2640.31	2661.92	2681.87	2696.84	2715.13	2755.03	2778.31	2803.25	2834.84	2889.71	2929.61	3011.08
93, 1-2 Alsóörs		0	0	0	0	0	0	0	0	0	0	0	0	0	0	0	0	0	0	0	0	0	0	0	0	0	0	0	0	0	0	0	0	0	0	0	0	0	0	0	0	0	0	0	0	0	0	0	0
95 Balatonalmádi		805.801	801.264	796.273	795.365	783.115	770.865	760.883	751.355	737.29	730.03	732.299	721.863	715.511	706.891	696.001	692.372	690.103	688.288	684.659	679.668	682.39	682.39	678.76	682.844	690.557	689.196	691.464	695.548	698.724	698.724	698.724	700.539	701.9	912.615	917.91	926.736	934.385	942.035	949.096	954.391	960.864	974.985	983.223	992.049	1003.23	1022.65	1036.77	1065.6
96-97, 1-2 Vörösberény		0	0	0	0	0	0	0	0	0	0	0	0	0	0	0	0	0	0	0	0	0	0	0	0	0	0	0	0	0	0	0	0	0	0	0	0	0	0	0	0	0	0	0	0	0	0	0	0
96-97,2-3 Budatava		1105.1	1098.88	1092.03	1090.79	1073.99	1057.19	1043.5	1030.43	1011.14	1001.18	1004.3	989.984	981.273	969.45	954.516	949.538	946.427	943.938	938.96	932.116	935.849	935.849	930.871	936.471	947.049	945.183	948.294	953.894	958.25	958.25	958.25	960.739	962.605	1251.59	1258.85	1270.95	1281.44	1291.93	1301.62	1308.88	1317.76	1337.12	1348.42	1360.52	1375.86	1402.49	1421.85	1461.39
98,2-3 Fűzfő, a Balaton sarka		1979.97	1968.82	1956.56	1954.33	1924.23	1894.12	1869.6	1846.19	1811.63	1793.79	1799.36	1773.72	1758.11	1736.93	1710.18	1701.26	1695.68	1691.22	1682.3	1670.04	1676.73	1676.73	1667.81	1677.84	1696.8	1693.45	1699.03	1709.06	1716.86	1716.86	1716.86	1721.32	1724.67	2242.42	2255.44	2277.12	2295.92	2314.71	2332.06	2345.08	2360.98	2395.68	2415.92	2437.61	2465.08	2512.79	2547.49	2618.33
99, 2-3 Fűzfő		0	0	0	0	0	0	0	0	0	0	0	0	0	0	0	0	0	0	0	0	0	0	0	0	0	0	0	0	0	0	0	0	0	0	0	0	0	0	0	0	0	0	0	0	0	0	0	0
102, 2-3 Balatonkenese		483.481	480.758	477.764	477.219	469.869	462.519	456.53	450.813	442.374	438.018	439.379	433.118	429.307	424.134	417.601	415.423	414.062	412.973	410.795	407.801	409.434	409.434	407.256	409.706	414.334	413.517	414.879	417.329	419.234	419.234	419.234	420.323	421.14	547.569	550.746	556.042	560.631	565.221	569.457	572.635	576.518	584.991	589.934	595.229	601.937	613.588	622.061	639.36
103, 2-3 Balatonkenese		2624.61	2609.83	2593.57	2590.62	2550.72	2510.82	2478.3	2447.27	2401.46	2377.81	2385.2	2351.21	2330.52	2302.44	2266.98	2255.15	2247.76	2241.85	2230.03	2213.77	2222.64	2222.64	2210.82	2224.12	2249.24	2244.81	2252.2	2265.5	2275.84	2275.84	2275.84	2281.75	2286.19	2972.52	2989.76	3018.51	3043.43	3068.34	3091.34	3108.59	3129.67	3175.67	3202.5	3231.25	3267.66	3330.9	3376.9	3470.81
104, 2-3 Akarattya		1680.67	1671.21	1660.8	1658.91	1633.35	1607.8	1586.98	1567.11	1537.78	1522.63	1527.37	1505.6	1492.35	1474.37	1451.66	1444.09	1439.36	1435.57	1428	1417.59	1423.27	1423.27	1415.7	1424.22	1440.3	1437.47	1442.2	1450.71	1457.34	1457.34	1457.34	1461.12	1463.96	1903.45	1914.5	1932.91	1948.86	1964.82	1979.54	1990.59	2004.09	2033.54	2050.72	2069.13	2092.45	2132.95	2162.4	2222.54
106, 1-2 Aliga		1680.67	1671.21	1660.8	1658.91	1633.35	1607.8	1586.98	1567.11	1537.78	1522.63	1527.37	1505.6	1492.35	1474.37	1451.66	1444.09	1439.36	1435.57	1428	1417.59	1423.27	1423.27	1415.7	1424.22	1440.3	1437.47	1442.2	1450.71	1457.34	1457.34	1457.34	1461.12	1463.96	1903.45	1914.5	1932.91	1948.86	1964.82	1979.54	1990.59	2004.09	2033.54	2050.72	2069.13	2092.45	2132.95	2162.4	2222.54
106, 2-3 Aliga		0	0	0	0	0	0	0	0	0	0	0	0	0	0	0	0	0	0	0	0	0	0	0	0	0	0	0	0	0	0	0	0	0	0	0	0	0	0	0	0	0	0	0	0	0	0	0	0
108,1-2 Balatonszentgyörgy		0	0	0	0	0	0	0	0	0	0	0	0	0	0	0	0	0	0	0	0	0	0	0	0	0	0	0	0	0	0	0	0	0	0	0	0	0	0	0	0	0	0	0	0	0	0	0	0
110, 1-2 Balatonberény		0	0	0	0	0	0	0	0	0	0	0	0	0	0	0	0	0	0	0	0	0	0	0	0	0	0	0	0	0	0	0	0	0	0	0	0	0	0	0	0	0	0	0	0	0	0	0	0
111,1 Balatonberény		667.664	663.904	659.769	659.017	648.867	638.717	630.446	622.551	610.897	604.882	606.762	598.115	592.852	585.709	576.687	573.679	571.8	570.296	567.289	563.153	565.409	565.409	562.401	565.785	572.176	571.048	572.928	576.311	578.943	578.943	578.943	580.446	581.574	756.166	760.554	767.867	774.205	780.543	786.393	790.781	796.144	807.845	814.67	821.983	831.247	847.335	859.036	882.925
112, 1-2 Balatonmáriafürdő		391.389	389.185	386.761	386.32	380.37	374.42	369.572	364.944	358.112	354.586	355.688	350.619	347.534	343.347	338.058	336.295	335.193	334.311	332.548	330.124	331.447	331.447	329.684	331.667	335.413	334.752	335.854	337.837	339.38	339.38	339.38	340.262	340.923	443.27	445.842	450.129	453.844	457.56	460.989	463.561	466.705	473.564	477.565	481.852	487.283	496.714	503.573	517.577
113, 1-2 Balatonmáriafürdő		0	0	0	0	0	0	0	0	0	0	0	0	0	0	0	0	0	0	0	0	0	0	0	0	0	0	0	0	0	0	0	0	0	0	0	0	0	0	0	0	0	0	0	0	0	0	0	0
114, 1-2 Balatonmáriafürdő		0	0	0	0	0	0	0	0	0	0	0	0	0	0	0	0	0	0	0	0	0	0	0	0	0	0	0	0	0	0	0	0	0	0	0	0	0	0	0	0	0	0	0	0	0	0	0	0
115, 1-2 Balatonfenyves		0	0	0	0	0	0	0	0	0	0	0	0	0	0	0	0	0	0	0	0	0	0	0	0	0	0	0	0	0	0	0	0	0	0	0	0	0	0	0	0	0	0	0	0	0	0	0	0
116, 1-2 Balatonfenyves		0	0	0	0	0	0	0	0	0	0	0	0	0	0	0	0	0	0	0	0	0	0	0	0	0	0	0	0	0	0	0	0	0	0	0	0	0	0	0	0	0	0	0	0	0	0	0	0
117, 1-2 Balatonfenyves		0	0	0	0	0	0	0	0	0	0	0	0	0	0	0	0	0	0	0	0	0	0	0	0	0	0	0	0	0	0	0	0	0	0	0	0	0	0	0	0	0	0	0	0	0	0	0	0
118, 1-2 Bélatelep		184.183	183.146	182.005	181.798	178.998	176.198	173.916	171.738	168.523	166.864	167.383	164.997	163.545	161.575	159.086	158.256	157.738	157.323	156.493	155.353	155.975	155.975	155.145	156.079	157.842	157.53	158.049	158.982	159.708	159.708	159.708	160.123	160.434	208.598	209.808	211.825	213.574	215.322	216.936	218.147	219.626	222.854	224.737	226.754	229.309	233.748	236.975	243.566
119, 1-2 Fonyód		1699.09	1689.52	1679	1677.08	1651.25	1625.42	1604.38	1584.29	1554.63	1539.32	1544.1	1522.1	1508.71	1490.53	1467.57	1459.92	1455.13	1451.31	1443.65	1433.13	1438.87	1438.87	1431.21	1439.82	1456.09	1453.22	1458	1466.61	1473.31	1473.31	1473.31	1477.14	1480.01	1924.31	1935.48	1954.09	1970.22	1986.35	2001.24	2012.4	2026.05	2055.83	2073.2	2091.81	2115.38	2156.32	2186.1	2246.89
120, 2-3 Fonyód		0	0	0	0	0	0	0	0	0	0	0	0	0	0	0	0	0	0	0	0	0	0	0	0	0	0	0	0	0	0	0	0	0	0	0	0	0	0	0	0	0	0	0	0	0	0	0	0
121, 1-2 Balatonboglár		0	0	0	0	0	0	0	0	0	0	0	0	0	0	0	0	0	0	0	0	0	0	0	0	0	0	0	0	0	0	0	0	0	0	0	0	0	0	0	0	0	0	0	0	0	0	0	0
122, 1-2 Balatonboglár		1892.48	1881.83	1870.1	1867.97	1839.2	1810.43	1786.99	1764.61	1731.58	1714.53	1719.86	1695.35	1680.43	1660.18	1634.61	1626.08	1620.76	1616.49	1607.97	1596.25	1602.64	1602.64	1594.12	1603.71	1621.82	1618.63	1623.95	1633.54	1641	1641	1641	1645.27	1648.46	2143.34	2155.78	2176.51	2194.47	2212.44	2229.02	2241.46	2256.66	2289.82	2309.17	2329.9	2356.15	2401.76	2434.92	2502.64
123, 1-2 Balatonboglár		345.343	343.399	341.26	340.871	335.621	330.371	326.093	322.009	315.981	312.87	313.842	309.37	306.648	302.953	298.286	296.731	295.759	294.981	293.425	291.286	292.453	292.453	290.897	292.647	295.953	295.37	296.342	298.092	299.453	299.453	299.453	300.231	300.814	391.121	393.39	397.173	400.451	403.729	406.755	409.025	411.799	417.851	421.381	425.164	429.955	438.277	444.329	456.686
124, 1-2 Balatonlelle		1853.34	1842.91	1831.43	1829.34	1801.16	1772.99	1750.03	1728.12	1695.77	1679.07	1684.29	1660.29	1645.68	1625.85	1600.8	1592.46	1587.24	1583.06	1574.71	1563.24	1569.5	1569.5	1561.15	1570.54	1588.28	1585.15	1590.37	1599.76	1607.06	1607.06	1607.06	1611.24	1614.37	2099.01	2111.19	2131.49	2149.09	2166.68	2182.92	2195.1	2209.99	2242.47	2261.41	2281.71	2307.43	2352.09	2384.57	2450.88
125, 1-2 Balatonlelle		0	0	0	0	0	0	0	0	0	0	0	0	0	0	0	0	0	0	0	0	0	0	0	0	0	0	0	0	0	0	0	0	0	0	0	0	0	0	0	0	0	0	0	0	0	0	0	0
126, 2-3 Balatonszemes		2072.06	2060.39	2047.56	2045.23	2013.72	1982.22	1956.56	1932.06	1895.89	1877.22	1883.05	1856.22	1839.89	1817.72	1789.72	1780.38	1774.55	1769.88	1760.55	1747.72	1754.72	1754.72	1745.38	1755.88	1775.72	1772.22	1778.05	1788.55	1796.72	1796.72	1796.72	1801.39	1804.89	2346.72	2360.34	2383.04	2402.71	2422.37	2440.53	2454.15	2470.79	2507.11	2528.29	2550.98	2579.73	2629.66	2665.97	2740.11
127, 1-2 Balatonöszöd		0	0	0	0	0	0	0	0	0	0	0	0	0	0	0	0	0	0	0	0	0	0	0	0	0	0	0	0	0	0	0	0	0	0	0	0	0	0	0	0	0	0	0	0	0	0	0	0
128, 1-2 Balatonszárszó		0	0	0	0	0	0	0	0	0	0	0	0	0	0	0	0	0	0	0	0	0	0	0	0	0	0	0	0	0	0	0	0	0	0	0	0	0	0	0	0	0	0	0	0	0	0	0	0
129, 1-2 Balatonszárszó		0	0	0	0	0	0	0	0	0	0	0	0	0	0	0	0	0	0	0	0	0	0	0	0	0	0	0	0	0	0	0	0	0	0	0	0	0	0	0	0	0	0	0	0	0	0	0	0
132, 1-2 Balatonföldvár		0	0	0	0	0	0	0	0	0	0	0	0	0	0	0	0	0	0	0	0	0	0	0	0	0	0	0	0	0	0	0	0	0	0	0	0	0	0	0	0	0	0	0	0	0	0	0	0
133, 1-2 Szántód		3237.02	3218.79	3198.74	3195.1	3145.89	3096.67	3056.58	3018.3	2961.8	2932.64	2941.75	2899.83	2874.31	2839.68	2795.94	2781.36	2772.24	2764.95	2750.37	2730.32	2741.26	2741.26	2726.68	2743.08	2774.07	2768.6	2777.71	2794.11	2806.87	2806.87	2806.87	2814.16	2819.63	3666.1	3687.38	3722.83	3753.56	3784.29	3812.65	3833.93	3859.93	3916.66	3949.75	3985.2	4030.11	4108.12	4164.84	4280.67
134, 1-2 Szántód		0	0	0	0	0	0	0	0	0	0	0	0	0	0	0	0	0	0	0	0	0	0	0	0	0	0	0	0	0	0	0	0	0	0	0	0	0	0	0	0	0	0	0	0	0	0	0	0
135, 1-2 Zamárdi		230.229	228.933	227.507	227.247	223.747	220.247	217.395	214.673	210.654	208.58	209.228	206.247	204.432	201.969	198.858	197.821	197.172	196.654	195.617	194.191	194.969	194.969	193.932	195.098	197.302	196.913	197.561	198.728	199.635	199.635	199.635	200.154	200.543	260.747	262.26	264.782	266.967	269.153	271.17	272.683	274.532	278.567	280.921	283.443	286.637	292.185	296.219	304.457
136, 1-2 Zamárdi		0	0	0	0	0	0	0	0	0	0	0	0	0	0	0	0	0	0	0	0	0	0	0	0	0	0	0	0	0	0	0	0	0	0	0	0	0	0	0	0	0	0	0	0	0	0	0	0
137, 1-2 Zamárdi		0	0	0	0	0	0	0	0	0	0	0	0	0	0	0	0	0	0	0	0	0	0	0	0	0	0	0	0	0	0	0	0	0	0	0	0	0	0	0	0	0	0	0	0	0	0	0	0
138, 1-2 Siófok		808.103	803.553	798.548	797.638	785.353	773.067	763.057	753.502	739.396	732.116	734.391	723.926	717.556	708.91	697.99	694.35	692.075	690.255	686.615	681.61	684.34	684.34	680.7	684.795	692.53	691.165	693.44	697.535	700.72	700.72	700.72	702.54	703.905	915.222	920.533	929.384	937.055	944.726	951.807	957.118	963.609	977.771	986.032	994.883	1006.1	1025.57	1039.73	1068.64
139, 1-2 Siófok beton a 142-be mérve		0	0	0	0	0	0	0	0	0	0	0	0	0	0	0	0	0	0	0	0	0	0	0	0	0	0	0	0	0	0	0	0	0	0	0	0	0	0	0	0	0	0	0	0	0	0	0	0
142, 1-2 Siófok beton a 139-ről is ide mérve		8039.27	8001.45	7959.86	7952.29	7850.2	7748.1	7664.91	7585.5	7468.27	7407.77	7426.68	7339.71	7286.77	7214.92	7124.17	7093.92	7075.01	7059.88	7029.63	6988.04	7010.72	7010.72	6980.47	7014.51	7078.79	7067.45	7086.35	7120.39	7146.86	7146.86	7146.86	7161.98	7173.33	9322.36	9366.5	9440.06	9503.81	9567.56	9626.41	9670.54	9724.49	9842.18	9910.84	9984.39	10077.6	10239.4	10357.1	10597.4
143, Siófok		0	0	0	0	0	0	0	0	0	0	0	0	0	0	0	0	0	0	0	0	0	0	0	0	0	0	0	0	0	0	0	0	0	0	0	0	0	0	0	0	0	0	0	0	0	0	0	0
144, 1-2 Siófok		0	0	0	0	0	0	0	0	0	0	0	0	0	0	0	0	0	0	0	0	0	0	0	0	0	0	0	0	0	0	0	0	0	0	0	0	0	0	0	0	0	0	0	0	0	0	0	0
145, 1-2 Siófok		0	0	0	0	0	0	0	0	0	0	0	0	0	0	0	0	0	0	0	0	0	0	0	0	0	0	0	0	0	0	0	0	0	0	0	0	0	0	0	0	0	0	0	0	0	0	0	0
146, 2-3 Siófok		0	0	0	0	0	0	0	0	0	0	0	0	0	0	0	0	0	0	0	0	0	0	0	0	0	0	0	0	0	0	0	0	0	0	0	0	0	0	0	0	0	0	0	0	0	0	0	0
147, 1-2 Balatonvilágos		0	0	0	0	0	0	0	0	0	0	0	0	0	0	0	0	0	0	0	0	0	0	0	0	0	0	0	0	0	0	0	0	0	0	0	0	0	0	0	0	0	0	0	0	0	0	0	0
148, 1-2 Balatonvilágos		0	0	0	0	0	0	0	0	0	0	0	0	0	0	0	0	0	0	0	0	0	0	0	0	0	0	0	0	0	0	0	0	0	0	0	0	0	0	0	0	0	0	0	0	0	0	0	0
148, 2-3 Balatonvilágos		0	0	0	0	0	0	0	0	0	0	0	0	0	0	0	0	0	0	0	0	0	0	0	0	0	0	0	0	0	0	0	0	0	0	0	0	0	0	0	0	0	0	0	0	0	0	0	0
Concrete wall	SUM	55680.5	55374.5	55037.8	54976.6	54150.2	53323.8	52650.5	52007.7	51058.9	50569.2	50722.3	50018.3	49589.8	49008.3	48273.8	48028.9	47875.9	47753.5	47508.6	47171.9	47355.6	47355.6	47110.7	47386.2	47906.5	47814.7	47967.7	48243.2	48457.4	48457.4	48457.4	48579.8	48671.6	63278.7	63636	64231.4	64747.3	65263.3	65739.6	66096.9	66533.5	67486.1	68041.8	68637.2	69391.3	70701.2	71653.8	73598.7
Rip-Rap
	Date	05.2003.	05.2003.	06.2003.	06.2003.	06.2003.	06.2003.	07.2003.	07.2003.	07.2003.	07.2003.	07.2003.	08.2003.	08.2003.	08.2003.	08.2003.	09.2003.	09.2003.	09.2003.	09.2003.	09.2003.	10.2003.	10.2003.	10.2003.	10.2003.	11.2003.	11.2003.	11.2003.	11.2003.	12.2003.	12.2003.	12.2003.	12.2003.	12.2003.	01.2004.	01.2004.	01.2004.	01.2004.	02.2004.	02.2004.	02.2004.	02.2004.	03.2004.	03.2004.	03.2004.	03.2004.	03.2004.	04.2004.	04.2004.
Number of the ortophoto, region	Water Level	63.7143	62.2857	60.7143	60.4286	56.5714	52.7143	49.5714	46.5714	42.1429	39.8571	40.5714	37.2857	35.2857	32.5714	29.1429	28	27.2857	26.7143	25.5714	24	24.8571	24.8571	23.7143	25	27.4286	27	27.7143	29	30	30	30	30.5714	31	31.5714	32.8571	35	36.8571	38.7143	40.4286	41.7143	43.2857	46.7143	48.7143	50.8571	53.5714	58.2857	61.7143	68.7143
53 Zala torok		0	0	0	0	0	0	0	0	0	0	0	0	0	0	0	0	0	0	0	0	0	0	0	0	0	0	0	0	0	0	0	0	0	0	0	0	0	0	0	0	0	0	0	0	0	0	0	0
55, 3 Keszthely		2155.54	2114.01	2067.81	2059.62	1946.74	1833.86	1742.04	1654.3	1524.76	1458.08	1478.84	1382.93	1324.44	1244.9	1144.59	1111.25	1090.49	1073.53	1040.19	994.279	1019.43	1019.43	985.798	1023.52	1094.58	1082.01	1102.77	1140.5	1169.74	1169.74	1169.74	1186.41	1198.98	1576.52	1625.45	1706.6	1777.14	1847.3	1912.53	1961.08	2021	2150.7	2226.55	2308.09	2410.86	2589.87	2719.57	2985.04
55, 1-2 Keszthely		9776.23	9587.89	9378.33	9341.2	8829.24	8317.29	7900.82	7502.93	6915.38	6612.98	6707.15	6272.12	6006.85	5646.1	5191.17	5039.98	4945.81	4868.88	4717.68	4509.45	4623.51	4623.51	4470.99	4642.08	4964.38	4907.34	5001.51	5172.61	5305.24	5305.24	5305.24	5380.84	5437.87	7150.16	7372.04	7740.13	8060.05	8378.26	8674.1	8894.27	9166.03	9754.28	10098.3	10468.1	10934.2	11746.1	12334.3	13538.3
57, 2-3 Keszthely		16910.5	16584.7	16222.2	16158	15272.4	14386.9	13666.5	12978.2	11961.9	11438.8	11601.7	10849.2	10390.4	9766.37	8979.47	8717.93	8555.04	8421.98	8160.44	7800.25	7997.55	7997.55	7733.72	8029.67	8587.16	8488.51	8651.4	8947.35	9176.77	9176.77	9176.77	9307.53	9406.19	12368	12751.8	13388.5	13941.9	14492.3	15004.1	15384.9	15855	16872.5	17467.6	18107.2	18913.5	20317.8	21335.4	23418
58 + 59, 2-3 Gyenesdiás		9702.98	9486.71	9246.08	9203.44	8615.56	8027.69	7549.47	7092.57	6417.88	6070.64	6178.78	5679.23	5374.64	4960.38	4438	4264.38	4156.24	4067.91	3894.29	3655.18	3786.16	3786.16	3611.01	3807.48	4177.56	4112.08	4220.21	4416.67	4568.97	4568.97	4568.97	4655.78	4721.27	6235.38	6490.16	6912.84	7280.2	7645.6	7985.31	8238.12	8550.19	9225.67	9620.69	10045.3	10580.6	11512.8	12188.3	13570.9
60, 2-3 Vonyarcvashegy		5201.85	5085.91	4956.9	4934.04	4618.88	4303.71	4047.34	3802.39	3440.68	3254.52	3312.5	3044.69	2881.39	2659.3	2379.25	2286.17	2228.2	2180.84	2087.76	1959.57	2029.79	2029.79	1935.9	2041.22	2239.63	2204.52	2262.49	2367.82	2449.47	2449.47	2449.47	2496.01	2531.12	3342.84	3479.43	3706.03	3902.98	4098.87	4281	4416.53	4583.83	4945.96	5157.74	5385.39	5672.35	6172.13	6534.26	7275.47
61, 1-2-3 Balatongyörök		6413.69	6270.74	6111.68	6083.49	5694.91	5306.32	4990.22	4688.21	4242.24	4012.71	4084.19	3753.99	3552.65	3278.83	2933.53	2818.76	2747.29	2688.9	2574.13	2416.08	2502.66	2502.66	2386.89	2516.75	2761.38	2718.09	2789.57	2919.43	3020.1	3020.1	3020.1	3077.49	3120.77	4121.6	4290.02	4569.4	4812.23	5053.76	5278.31	5445.42	5651.7	6098.19	6359.3	6639.99	6993.8	7610.01	8056.51	8970.39
62 + 63, 2-3 Balatongyörök, alulról a 3. utcától délre, kis maradék rész		0	0	0	0	0	0	0	0	0	0	0	0	0	0	0	0	0	0	0	0	0	0	0	0	0	0	0	0	0	0	0	0	0	0	0	0	0	0	0	0	0	0	0	0	0	0	0	0
63, 1-2 Afrikapark		1054.22	1030.72	1004.58	999.943	936.071	872.199	820.241	770.6	697.296	659.569	671.317	617.042	583.948	538.94	482.183	463.32	451.571	441.974	423.11	397.131	411.362	411.362	392.332	413.678	453.888	446.772	458.521	479.867	496.414	496.414	496.414	505.846	512.961	677.467	705.149	751.072	790.986	830.685	867.595	895.063	928.968	1002.36	1045.28	1091.41	1149.57	1250.86	1324.25	1474.46
64 + 65 Balatoneerics		0	0	0	0	0	0	0	0	0	0	0	0	0	0	0	0	0	0	0	0	0	0	0	0	0	0	0	0	0	0	0	0	0	0	0	0	0	0	0	0	0	0	0	0	0	0	0	0
66, 2-3 Szigliget		6507.07	6362.03	6200.66	6172.06	5777.82	5383.57	5062.87	4756.46	4304	4071.13	4143.65	3808.64	3604.37	3326.56	2976.23	2859.8	2787.28	2728.05	2611.61	2451.26	2539.09	2539.09	2421.64	2553.39	2801.58	2757.66	2830.18	2961.94	3064.07	3064.07	3064.07	3122.29	3166.21	4181.6	4352.47	4635.93	4882.29	5127.33	5355.16	5524.7	5733.98	6186.97	6451.88	6736.66	7095.62	7720.8	8173.8	9100.98
67, 2-3 Szigliget - Balatontördemic, óriási hajdani nádas és lápvidék		0	0	0	0	0	0	0	0	0	0	0	0	0	0	0	0	0	0	0	0	0	0	0	0	0	0	0	0	0	0	0	0	0	0	0	0	0	0	0	0	0	0	0	0	0	0	0	0
68, 2-3 Badacsony		1672.21	1634.94	1593.47	1586.12	1484.8	1383.49	1301.07	1222.33	1106.06	1046.21	1064.85	978.757	926.263	854.87	764.842	734.921	716.285	701.062	671.14	629.932	652.505	652.505	622.32	656.179	719.96	708.674	727.309	761.168	787.415	787.415	787.415	802.376	813.662	1074.6	1118.51	1191.36	1254.67	1317.64	1376.19	1419.75	1473.54	1589.95	1658.03	1731.21	1823.45	1984.12	2100.53	2338.8
69, 1-2 Badacsony		8685.2	8455.57	8200.08	8154.8	7530.62	6906.44	6398.68	5913.57	5197.21	4828.52	4943.33	4412.94	4089.53	3649.69	3095.04	2910.7	2795.89	2702.1	2517.75	2263.88	2402.94	2402.94	2216.98	2425.58	2818.52	2748.99	2863.8	3072.4	3234.11	3234.11	3234.11	3326.28	3395.81	4523.4	4793.93	5242.7	5632.76	6020.72	6381.42	6649.84	6981.18	7698.38	8117.8	8568.67	9136.98	10126.8	10844	12312
72, 2-3 Badacsonyörs		2102.91	2062.4	2017.32	2009.33	1899.21	1789.09	1699.5	1613.92	1487.53	1422.48	1442.74	1349.16	1292.1	1214.5	1116.65	1084.12	1063.87	1047.32	1014.8	970.004	994.539	994.539	961.73	998.534	1067.86	1055.59	1075.85	1112.65	1141.18	1141.18	1141.18	1157.44	1169.71	1538.03	1585.76	1664.94	1733.75	1802.2	1865.84	1913.2	1971.66	2098.19	2172.19	2251.74	2352	2526.63	2653.17	2912.16
73, 1-2 Ábrahámhegy		2776.87	2723.37	2663.85	2653.3	2507.88	2362.47	2244.17	2131.16	1964.27	1878.37	1905.12	1781.55	1706.21	1603.74	1474.52	1431.57	1404.82	1382.97	1340.03	1280.88	1313.28	1313.28	1269.95	1318.55	1410.1	1393.9	1420.65	1469.24	1506.92	1506.92	1506.92	1528.39	1544.59	2030.95	2093.98	2198.53	2289.4	2379.79	2463.82	2526.35	2603.55	2770.64	2868.35	2973.39	3105.79	3336.39	3503.48	3845.47
73, 2-3 Ábrahámhegy		0	0	0	0	0	0	0	0	0	0	0	0	0	0	0	0	0	0	0	0	0	0	0	0	0	0	0	0	0	0	0	0	0	0	0	0	0	0	0	0	0	0	0	0	0	0	0	0
74, 2-3 Kővágóörs		4596	4507.46	4408.94	4391.49	4150.81	3910.12	3714.34	3527.28	3251.06	3108.9	3153.17	2948.65	2823.94	2654.35	2440.48	2369.39	2325.12	2288.96	2217.88	2119.98	2173.61	2173.61	2101.9	2182.34	2333.85	2307.04	2351.31	2431.75	2494.1	2494.1	2494.1	2529.64	2556.45	3361.43	3465.75	3638.79	3789.19	3938.79	4077.87	4181.38	4309.14	4585.69	4747.41	4921.26	5140.4	5522.07	5798.62	6364.65
75, 2-3 Révfülöp		14847.8	14561.7	14243.4	14187	13409.5	12632	11999.5	11395.2	10502.8	10043.5	10186.6	9525.85	9122.98	8575.07	7884.15	7654.52	7511.5	7394.67	7165.03	6848.78	7022.01	7022.01	6790.36	7050.21	7539.7	7453.08	7596.1	7855.95	8057.39	8057.39	8057.39	8172.21	8258.82	10859.4	11196.4	11755.4	12241.3	12724.6	13173.9	13508.3	13921	14814.4	15336.9	15898.5	16606.5	17839.5	18732.9	20561.5
76, 2-3 Balatonszepezd		2295.17	2250.95	2201.75	2193.04	2072.84	1952.65	1854.88	1761.47	1623.53	1552.53	1574.64	1472.51	1410.23	1325.54	1218.73	1183.24	1161.13	1143.07	1107.57	1058.69	1085.46	1085.46	1049.66	1089.82	1165.49	1152.1	1174.21	1214.37	1245.51	1245.51	1245.51	1263.26	1276.65	1678.64	1730.74	1817.15	1892.26	1966.97	2036.42	2088.11	2151.91	2290.02	2370.78	2457.6	2567.03	2757.63	2895.73	3178.4
77, 1-2 Balatonszepezd		11458.8	11238.1	10992.5	10948.9	10348.9	9748.79	9260.66	8794.28	8105.6	7751.15	7861.53	7351.63	7040.71	6617.86	6084.64	5907.42	5797.04	5706.88	5529.65	5285.58	5419.28	5419.28	5240.5	5441.04	5818.81	5751.96	5862.34	6062.88	6218.34	6218.34	6218.34	6306.95	6373.79	8380.79	8640.86	9072.3	9447.29	9820.26	10167	10425.1	10743.6	11433.1	11836.3	12269.8	12816.1	13767.7	14457.2	15868.5
78, 2-3 Zánka		3570.26	3501.48	3424.95	3411.39	3224.42	3037.46	2885.37	2740.06	2525.48	2415.05	2449.44	2290.57	2193.69	2061.95	1895.81	1840.59	1806.2	1778.11	1722.89	1646.84	1688.5	1688.5	1632.8	1695.28	1812.98	1792.15	1826.54	1889.03	1937.46	1937.46	1937.46	1965.07	1985.9	2611.23	2692.26	2826.68	2943.52	3059.73	3167.77	3248.17	3347.42	3562.25	3687.88	3822.93	3993.16	4289.65	4504.47	4944.18
79, 2-3 Vérkút		4618.67	4529.69	4430.69	4413.15	4171.28	3929.41	3732.66	3544.68	3267.09	3124.23	3168.72	2963.19	2837.87	2667.44	2452.51	2381.08	2336.59	2300.25	2228.82	2130.44	2184.33	2184.33	2112.27	2193.1	2345.36	2318.42	2362.91	2443.74	2506.4	2506.4	2506.4	2542.12	2569.06	3378.01	3482.84	3656.74	3807.88	3958.22	4097.98	4202	4330.39	4608.3	4770.82	4945.54	5165.75	5549.3	5827.22	6396.04
80, 2-3 Balatonakali		9798.38	9609.62	9399.59	9362.37	8849.25	8336.14	7918.73	7519.94	6931.05	6627.97	6722.35	6286.33	6020.47	5658.89	5202.94	5051.4	4957.02	4879.92	4728.37	4519.67	4633.99	4633.99	4481.12	4652.6	4975.63	4918.47	5012.85	5184.33	5317.26	5317.26	5317.26	5393.03	5450.19	7166.36	7388.75	7757.67	8078.32	8397.25	8693.76	8914.42	9186.8	9776.39	10121.2	10491.8	10959	11772.7	12362.3	13569
81, 2-3 Balatonakali		5723.75	5613.49	5490.79	5469.05	5169.31	4869.58	4625.75	4392.79	4048.79	3871.74	3926.88	3672.18	3516.87	3305.66	3039.31	2950.79	2895.65	2850.62	2762.09	2640.18	2706.96	2706.96	2617.66	2717.83	2906.53	2873.14	2928.27	3028.44	3106.09	3106.09	3106.09	3150.35	3183.74	4186.25	4316.16	4531.66	4718.97	4905.27	5078.48	5207.38	5366.5	5710.9	5912.31	6128.82	6401.73	6877.05	7221.46	7926.38
82, 2-3 Balatonudvari		5789.66	5678.12	5554.02	5532.03	5228.84	4925.65	4679.01	4443.37	4095.41	3916.33	3972.09	3714.46	3557.37	3343.72	3074.31	2984.76	2929	2883.44	2793.9	2670.58	2738.13	2738.13	2647.8	2749.13	2939.99	2906.22	2961.99	3063.31	3141.86	3141.86	3141.86	3186.63	3220.4	4234.45	4365.86	4583.84	4773.31	4961.76	5136.96	5267.34	5428.29	5776.66	5980.39	6199.39	6475.44	6956.24	7304.61	8017.65
83, 2-3 Örvényes		1240.64	1216.74	1190.15	1185.43	1120.46	1055.5	1002.65	952.151	877.588	839.213	851.163	795.956	762.293	716.512	658.78	639.592	627.642	617.88	598.692	572.267	586.742	586.742	567.386	589.098	629.998	622.761	634.711	656.424	673.255	673.255	673.255	682.849	690.086	907.383	935.541	982.252	1022.85	1063.23	1100.78	1128.72	1163.2	1237.86	1281.51	1328.44	1387.59	1490.62	1565.27	1718.07
84, 1-2 Tihany		7847.13	7721.52	7581.76	7556.99	7215.54	6874.09	6596.33	6330.96	5939.09	5737.4	5800.21	5510.06	5333.15	5092.54	4789.13	4688.29	4625.48	4574.18	4473.33	4334.45	4410.53	4410.53	4308.8	4422.91	4637.87	4599.83	4662.63	4776.75	4865.2	4865.2	4865.2	4915.62	4953.66	6489.56	6637.55	6883.04	7096.41	7308.64	7505.96	7652.79	7834.05	8226.38	8455.82	8702.46	9013.34	9554.81	9947.14	10750.2
85, 2-3 Tihany		23030.5	22742.9	22422.9	22366.2	21584.4	20802.6	20166.7	19559.1	18661.8	18200	18343.8	17679.5	17274.4	16723.5	16028.8	15797.9	15654.1	15536.7	15305.8	14987.8	15162	15162	14929	15190.3	15682.5	15595.4	15739.2	16000.5	16203	16203	16203	16318.5	16405.5	21425.3	21764.1	22326.2	22814.8	23300.7	23752.5	24088.7	24503.7	25402	25927.3	26492	27203.8	28443.6	29341.9	31180.5
85, 1-2 Tihany		18107.6	17881.5	17629.9	17585.3	16970.6	16355.9	15855.9	15378.1	14672.7	14309.6	14422.7	13900.4	13581.9	13148.7	12602.5	12421	12307.9	12215.6	12034	11784	11921	11921	11737.8	11943.3	12330.2	12261.8	12374.8	12580.2	12739.5	12739.5	12739.5	12830.3	12898.7	16845.5	17111.9	17553.8	17937.9	18320	18675.2	18939.5	19265.8	19972.1	20385.1	20829.1	21388.8	22363.6	23069.8	24515.5
87, 2-3 Tihany (Óvár)		36140.7	35689.4	35187.2	35098.2	33871.4	32644.6	31646.6	30693.1	29285.1	28560.4	28786.1	27743.6	27107.9	26243.4	25153.3	24790.9	24565.3	24380.9	24018.6	23519.6	23792.9	23792.9	23427.4	23837.4	24609.8	24473.1	24698.8	25108.8	25426.6	25426.6	25426.6	25607.8	25744.4	33621.7	34153.4	35035.5	35802.1	36564.7	37273.6	37801.2	38452.5	39862.1	40686.5	41572.7	42689.7	44635.2	46044.9	48930.1
86, 2-3 Tihany (Diós)		0	0	0	0	0	0	0	0	0	0	0	0	0	0	0	0	0	0	0	0	0	0	0	0	0	0	0	0	0	0	0	0	0	0	0	0	0	0	0	0	0	0	0	0	0	0	0	0
86, 1-2 Tihany (Diós)		4965.5	4903.49	4834.49	4822.27	4653.71	4485.15	4348.03	4217.03	4023.58	3924.01	3955.02	3811.79	3724.45	3605.67	3455.89	3406.11	3375.11	3349.78	3300	3231.44	3268.99	3268.99	3218.77	3275.11	3381.22	3362.44	3393.45	3449.78	3493.45	3493.45	3493.45	3518.34	3537.11	4619.4	4692.45	4813.64	4918.98	5023.74	5121.15	5193.64	5283.11	5476.79	5590.05	5711.81	5865.28	6132.58	6326.26	6722.67
88-89, 2-3 Balatonfüred		25263.4	24947.9	24596.9	24534.7	23677.1	22819.5	22121.9	21455.4	20471.1	19964.6	20122.3	19393.6	18949.2	18344.9	17582.9	17329.6	17171.8	17043	16789.7	16440.9	16632	16632	16376.5	16663.1	17202.9	17107.4	17265.2	17551.8	17773.9	17773.9	17773.9	17900.6	17996.1	23502.5	23874.2	24490.8	25026.7	25559.8	26055.3	26424.2	26879.4	27864.8	28441	29060.5	29841.3	31201.3	32186.7	34203.6
89, 1-2 Balatonfüred		27232.8	26892.7	26514.3	26447.3	25522.8	24598.4	23846.4	23127.9	22066.9	21520.9	21690.9	20905.4	20426.4	19775	18953.5	18680.5	18510.4	18371.5	18098.5	17722.5	17928.5	17928.5	17653.1	17962	18544	18441	18611	18920	19159.5	19159.5	19159.5	19296	19399	25334.6	25735.3	26400	26977.7	27552.2	28086.5	28484	28974.7	30036.9	30658.1	31325.9	32167.6	33633.6	34695.8	36869.9
91-92, 2-2-3 Csopak		4329.7	4189.04	4032.54	4004.8	3622.45	3240.1	2929.06	2631.9	2193.08	1967.24	2037.57	1712.66	1514.55	1245.12	905.364	792.442	722.112	664.66	551.737	396.221	481.408	481.408	367.495	495.276	735.98	693.386	763.716	891.497	990.552	990.552	990.552	1047.01	1089.61	1486.28	1652	1926.9	2165.84	2403.49	2624.44	2788.87	2991.83	3431.17	3688.09	3964.28	4312.4	4918.73	5358.07	6257.29
92-93, 3-2-3 Alsóörs		6796.5	6575.71	6330.03	6286.49	5686.3	5086.1	4597.86	4131.39	3442.57	3088.05	3198.45	2688.44	2377.45	1954.52	1421.19	1243.93	1133.53	1043.34	866.084	621.963	755.685	755.685	576.871	777.454	1155.3	1088.44	1198.83	1399.42	1554.91	1554.91	1554.91	1643.54	1710.4	2333.08	2593.2	3024.73	3399.8	3772.85	4119.68	4377.79	4696.4	5386.04	5789.33	6222.88	6769.35	7721.13	8410.77	9822.31
93, 1-2 Alsóörs		1058.73	1024.33	986.064	979.282	885.786	792.291	716.235	643.57	536.268	481.042	498.24	418.793	370.349	304.466	221.386	193.773	176.576	162.527	134.915	96.8867	117.717	117.717	89.8624	121.108	179.967	169.552	186.749	217.995	242.217	242.217	242.217	256.023	266.438	363.436	403.958	471.179	529.605	587.717	641.746	681.953	731.584	839.013	901.837	969.373	1054.5	1202.76	1310.19	1530.08
95 Balatonalmádi		4889.8	4710.43	4510.85	4475.48	3987.89	3500.3	3103.66	2724.7	2165.11	1877.1	1966.79	1552.46	1299.82	956.234	522.96	378.957	289.27	216.005	72.0018	0	0	0	0	0	306.955	252.638	342.324	505.276	631.594	631.594	631.594	703.596	757.913	1076.28	1287.6	1638.17	1942.87	2245.93	2527.7	2737.38	2996.21	3556.47	3884.1	4236.31	4680.25	5453.47	6013.72	7160.44
96-97, 1-2 Vörösberény		1150.07	1107.88	1060.94	1052.62	937.941	823.26	729.972	640.842	509.227	441.489	462.583	365.134	305.715	224.904	122.999	89.1296	68.0356	50.8039	16.9346	0	0	0	0	0	72.195	59.4197	80.5137	118.839	148.549	148.549	148.549	165.484	178.259	253.138	302.841	385.293	456.958	528.237	594.508	643.825	704.702	836.472	913.531	996.369	1100.78	1282.64	1414.41	1684.12
96-97,2-3 Budatava		11669.6	11241.5	10765.2	10680.8	9517.15	8353.5	7406.91	6502.53	5167.05	4479.72	4693.76	3704.96	3102.04	2282.06	1248.05	904.385	690.347	515.499	171.833	0	0	0	0	0	732.552	602.923	816.961	1205.85	1507.31	1507.31	1507.31	1679.14	1808.77	2568.55	3072.88	3909.51	4636.68	5359.95	6032.38	6532.8	7150.5	8487.56	9269.46	10110	11169.5	13014.8	14351.8	17088.5
98,2-3 Fűzfő, a Balaton sarka		5819.03	5649.39	5460.64	5427.19	4966.07	4504.94	4129.83	3771.44	3242.22	2969.84	3054.66	2662.82	2423.9	2098.96	1689.2	1553.02	1468.2	1398.91	1262.72	1075.16	1177.9	1177.9	1040.52	1194.63	1484.92	1433.55	1518.37	1672.48	1791.94	1791.94	1791.94	1860.04	1911.4	2567.12	2766.97	3098.51	3386.67	3673.29	3939.76	4138.06	4382.85	4912.69	5222.54	5555.63	5975.48	6706.73	7236.58	8321.06
99, 2-3 Fűzfő		5017.84	4871.56	4708.79	4679.95	4282.31	3884.68	3561.21	3252.17	2795.81	2560.94	2634.08	2296.19	2090.17	1809.97	1456.63	1339.19	1266.05	1206.3	1088.86	927.131	1015.72	1015.72	897.257	1030.15	1280.47	1236.17	1309.31	1442.2	1545.22	1545.22	1545.22	1603.94	1648.23	2213.66	2386	2671.89	2920.38	3167.53	3397.31	3568.32	3779.39	4236.29	4503.48	4790.71	5152.75	5783.32	6240.21	7175.37
102, 2-3 Balatonkenese		6792.72	6652.34	6496.14	6468.46	6086.86	5705.25	5394.83	5098.25	4660.3	4434.89	4505.08	4180.82	3983.1	3714.2	3375.11	3262.4	3192.21	3134.87	3022.17	2866.96	2951.98	2951.98	2838.29	2965.82	3206.05	3163.54	3233.73	3361.26	3460.13	3460.13	3460.13	3516.48	3558.99	4688.56	4853.95	5128.31	5366.78	5603.96	5824.48	5988.59	6191.16	6629.63	6886.04	7161.69	7509.13	8114.27	8552.75	9450.2
103, 2-3 Balatonkenese		12141.3	11890.4	11611.2	11561.7	10879.6	10197.5	9642.69	9112.58	8329.79	7926.9	8052.36	7472.78	7119.37	6638.74	6032.65	5831.2	5705.75	5603.26	5401.82	5124.39	5276.36	5276.36	5073.15	5301.1	5730.48	5654.5	5779.96	6007.91	6184.61	6184.61	6184.61	6285.33	6361.31	8380.31	8675.92	9166.32	9592.56	10016.5	10410.7	10704	11066	11849.8	12308.1	12800.8	13421.8	14503.4	15287.1	16891.2
104, 2-3 Akarattya		24899	24384.5	23811.9	23710.4	22311.7	20912.9	19775	18687.9	17082.5	16256.3	16513.6	15325	14600.2	13614.6	12371.6	11958.5	11701.2	11491	11077.9	10509	10820.6	10820.6	10403.9	10871.4	11751.9	11596.1	11853.4	12320.9	12683.3	12683.3	12683.3	12889.8	13045.6	17186.1	17792.4	18798.1	19672.2	20541.6	21349.9	21951.4	22694	24301.2	25241.1	26251.5	27525.1	29743.2	31350.5	34640.1
106, 1-2 Aliga		38297.8	37560	36739	36593.6	34588	32582.5	30951	29392.3	27090.6	25905.9	26274.8	24570.6	23531.5	22118.2	20336.1	19743.8	19374.9	19073.5	18481.2	17665.5	18112.3	18112.3	17514.8	18185.1	19447.6	19224.2	19593.1	20263.4	20782.9	20782.9	20782.9	21079.1	21302.5	28010.3	28879.5	30321.5	31574.8	32821.3	33980.3	34842.7	35907.4	38211.8	39559.4	41008.1	42834.1	46014.5	48318.9	53035.6
106, 2-3 Aliga		3219.38	3157.36	3088.35	3076.12	2907.53	2738.94	2601.8	2470.77	2277.28	2177.7	2208.71	2065.45	1978.1	1859.3	1709.49	1659.7	1628.69	1603.36	1553.57	1484.99	1522.56	1522.56	1472.33	1528.67	1634.8	1616.02	1647.03	1703.38	1747.05	1747.05	1747.05	1771.95	1790.73	2354.6	2427.67	2548.88	2654.23	2759.02	2856.44	2928.95	3018.44	3212.15	3325.44	3447.22	3600.72	3868.07	4061.78	4458.27
108,1-2 Balatonszentgyörgy		0	0	0	0	0	0	0	0	0	0	0	0	0	0	0	0	0	0	0	0	0	0	0	0	0	0	0	0	0	0	0	0	0	0	0	0	0	0	0	0	0	0	0	0	0	0	0	0
110, 1-2 Balatonberény		0	0	0	0	0	0	0	0	0	0	0	0	0	0	0	0	0	0	0	0	0	0	0	0	0	0	0	0	0	0	0	0	0	0	0	0	0	0	0	0	0	0	0	0	0	0	0	0
111,1Balatonberény		17254.3	16869.7	16441.8	16366	15320.6	14275.2	13424.8	12612.4	11412.6	10795.1	10987.4	10099.1	9557.45	8820.8	7891.87	7583.12	7390.84	7233.76	6925.02	6499.82	6732.73	6732.73	6421.28	6770.65	7428.75	7312.3	7504.59	7853.95	8124.78	8124.78	8124.78	8279.15	8395.6	11088.1	11541.1	12292.7	12946	13595.8	14199.9	14649.4	15204.4	16405.5	17108	17863.1	18814.9	20472.7	21673.9	24132.4
112, 1-2 Balatonmáriafürdő		8673.48	8308.11	7901.59	7829.54	6836.38	5843.21	5035.3	4263.41	3123.58	2536.95	2719.63	1875.69	1361.1	661.253	0	0	0	0	0	0	0	0	0	0	0	0	0	0	0	0	0	146.659	257.297	523.872	954.314	1668.38	2289.02	2906.32	3480.24	3907.35	4434.56	5575.73	6243.08	6960.48	7864.75	9439.7	10580.9	12916.6
113, 1-2 Balatonmáriafürdő		961.539	921.035	875.968	867.981	757.879	647.777	558.212	472.64	346.28	281.245	301.497	207.939	150.891	73.3063	0	0	0	0	0	0	0	0	0	0	0	0	0	0	0	0	0	16.2586	28.5239	58.0763	105.795	184.956	253.76	322.194	385.819	433.168	491.614	618.124	692.106	771.637	871.884	1046.48	1172.99	1431.93
114, 1-2 Balatonmáriafürdő		1616.96	1548.84	1473.06	1459.63	1274.47	1089.32	938.707	794.807	582.315	472.951	507.007	349.677	253.744	123.274	0	0	0	0	0	0	0	0	0	0	0	0	0	0	0	0	0	27.341	47.9666	97.6629	177.908	311.028	426.731	541.812	648.805	728.429	826.714	1039.46	1163.87	1297.61	1466.19	1759.8	1972.54	2407.98
115, 1-2 Balatonfenyves		0	0	0	0	0	0	0	0	0	0	0	0	0	0	0	0	0	0	0	0	0	0	0	0	0	0	0	0	0	0	0	0	0	0	0	0	0	0	0	0	0	0	0	0	0	0	0	0
116, 1-2 Balatonfenyves		7193.88	6890.85	6553.67	6493.91	5670.17	4846.43	4176.34	3536.12	2590.74	2104.17	2255.69	1555.72	1128.91	548.451	0	0	0	0	0	0	0	0	0	0	0	0	0	0	0	0	0	121.641	213.405	434.505	791.519	1383.77	1898.54	2410.54	2886.55	3240.8	3678.07	4624.57	5178.08	5773.11	6523.11	7829.4	8775.9	10713.2
117, 1-2 Balatonfenyves		4454.48	4266.84	4058.05	4021.05	3510.99	3000.92	2586	2189.58	1604.19	1302.91	1396.73	963.309	699.027	339.603	0	0	0	0	0	0	0	0	0	0	0	0	0	0	0	0	0	75.3204	132.141	269.047	490.111	856.838	1175.58	1492.61	1787.36	2006.71	2277.48	2863.55	3206.29	3574.73	4039.13	4847.99	5434.07	6633.64
118, 1-2 Bélatelep		10148	9720.49	9244.86	9160.57	7998.56	6836.56	5891.3	4988.19	3654.59	2968.23	3181.96	2194.56	1592.49	773.666	0	0	0	0	0	0	0	0	0	0	0	0	0	0	0	0	0	171.591	301.037	612.93	1116.55	1952.01	2678.15	3400.39	4071.88	4571.6	5188.43	6523.6	7304.41	8143.77	9201.75	11044.4	12379.6	15112.4
119, 1-2 Fonyód		17539.7	16800.9	15978.8	15833.1	13824.7	11816.3	10182.5	8621.56	6316.58	5130.27	5499.69	3793.07	2752.45	1337.2	0	0	0	0	0	0	0	0	0	0	0	0	0	0	0	0	0	296.577	520.311	1059.38	1929.83	3373.84	4628.9	5877.22	7037.82	7901.53	8967.66	11275.4	12624.9	14075.6	15904.3	19089.2	21396.9	26120.2
120, 2-3 Fonyód		7366.67	7056.36	6711.08	6649.89	5806.36	4962.83	4276.65	3621.06	2652.96	2154.71	2309.87	1593.09	1156.03	561.624	0	0	0	0	0	0	0	0	0	0	0	0	0	0	0	0	0	124.563	218.531	444.942	810.531	1417.01	1944.14	2468.43	2955.89	3318.64	3766.42	4735.65	5302.46	5911.77	6679.79	8017.45	8986.69	10970.5
121, 1-2 Balatonboglár		6936.53	6644.34	6319.22	6261.6	5467.33	4673.05	4026.93	3409.62	2498.06	2028.9	2175	1500.07	1088.53	528.831	0	0	0	0	0	0	0	0	0	0	0	0	0	0	0	0	0	117.289	205.771	418.961	763.204	1334.27	1830.62	2324.3	2783.29	3124.87	3546.5	4459.14	4992.85	5566.58	6289.76	7549.31	8461.95	10329.9
122, 1-2 Balatonboglár		16115.6	15436.8	14681.4	14547.6	12702.2	10856.9	9355.77	7921.57	5803.73	4713.74	5053.17	3485.11	2528.97	1228.63	0	0	0	0	0	0	0	0	0	0	0	0	0	0	0	0	0	272.498	478.067	973.373	1773.15	3099.91	4253.08	5400.05	6466.42	7260	8239.57	10359.9	11599.9	12932.8	14613	17539.3	19659.7	23999.5
123, 1-2 Balatonboglár		13447.1	12880.7	12250.4	12138.7	10598.9	9059.14	7806.58	6609.86	4842.71	3933.21	4216.43	2908.02	2110.21	1025.19	0	0	0	0	0	0	0	0	0	0	0	0	0	0	0	0	0	227.376	398.905	812.195	1479.54	2586.61	3548.83	4505.87	5395.66	6057.84	6875.2	8644.45	9679.09	10791.3	12193.3	14635	16404.3	20025.5
124, 1-2 Balatonlelle		21789.6	20871.7	19850.4	19669.4	17174.4	14679.4	12649.7	10710.6	7847.09	6373.33	6832.27	4712.13	3419.37	1661.2	0	0	0	0	0	0	0	0	0	0	0	0	0	0	0	0	0	368.438	646.383	1316.07	2397.43	4191.32	5750.49	7301.28	8743.09	9816.07	11140.5	14007.4	15683.9	17486.2	19757.9	23714.5	26581.3	32449.2
125, 1-2 Balatonlelle		12752.2	12215	11617.3	11511.4	10051.2	8591.01	7403.17	6268.3	4592.47	3729.96	3998.55	2757.75	2001.16	972.21	0	0	0	0	0	0	0	0	0	0	0	0	0	0	0	0	0	215.626	378.292	770.225	1403.08	2452.95	3365.44	4273.03	5116.84	5744.8	6519.93	8197.74	9178.92	10233.7	11563.2	13878.8	15556.6	18990.7
126, 2-3 Balatonszemes		19146.4	18339.9	17442.5	17283.4	15091.1	12898.7	11115.2	9411.33	6895.2	5600.22	6003.48	4140.53	3004.58	1459.69	0	0	0	0	0	0	0	0	0	0	0	0	0	0	0	0	0	323.745	567.974	1156.43	2106.61	3682.89	5052.93	6415.6	7682.51	8625.34	9789.13	12308.2	13781.4	15365	17361.2	20837.8	23356.9	28513
127, 1-2 Balatonöszöd		17520.8	16782.7	15961.5	15816	13809.7	11803.5	10171.5	8612.25	6309.76	5124.73	5493.75	3788.98	2749.48	1335.76	0	0	0	0	0	0	0	0	0	0	0	0	0	0	0	0	0	296.257	519.75	1058.24	1927.75	3370.19	4623.91	5870.88	7030.23	7893	8957.98	11263.2	12611.3	14060.5	15887.1	19068.6	21373.8	26092
128, 1-2 Balatonszárszó		3468.03	3321.94	3159.39	3130.59	2733.48	2336.37	2013.33	1704.69	1248.94	1014.38	1087.42	749.983	544.226	264.397	0	0	0	0	0	0	0	0	0	0	0	0	0	0	0	0	0	58.6406	102.878	209.466	381.576	667.09	915.248	1162.07	1391.55	1562.32	1773.13	2229.41	2496.25	2783.1	3144.66	3774.4	4230.69	5164.61
129, 1-2 Balatonszárszó		6544.7	6269.01	5962.26	5907.89	5158.49	4409.08	3799.46	3217.02	2356.95	1914.29	2052.13	1415.33	1027.04	498.958	0	0	0	0	0	0	0	0	0	0	0	0	0	0	0	0	0	110.664	194.147	395.295	720.091	1258.9	1727.21	2193.01	2626.07	2948.35	3346.16	4207.25	4710.81	5252.13	5934.46	7122.86	7983.95	9746.41
132, 1-2 Balatonföldvár		4849.41	4645.13	4417.84	4377.56	3822.27	3266.98	2815.27	2383.7	1746.42	1418.43	1520.56	1048.71	761.002	369.712	0	0	0	0	0	0	0	0	0	0	0	0	0	0	0	0	0	81.9983	143.857	292.901	533.564	932.805	1279.81	1624.95	1945.83	2184.63	2479.39	3117.43	3490.55	3891.66	4397.24	5277.81	5915.85	7221.77
133, 1-2 Szántód		8940.97	8564.34	8145.27	8071.01	7047.21	6023.42	5190.59	4394.89	3219.92	2615.19	2803.5	1933.54	1403.08	681.646	0	0	0	0	0	0	0	0	0	0	0	0	0	0	0	0	0	151.182	265.232	540.028	983.745	1719.83	2359.61	2995.95	3587.57	4027.85	4571.32	5747.69	6435.62	7175.15	8107.3	9730.82	10907.2	13315
134, 1-2 Szántód		9533.54	9131.95	8685.11	8605.92	7514.27	6422.62	5534.6	4686.17	3433.32	2788.51	2989.31	2061.69	1496.07	726.823	0	0	0	0	0	0	0	0	0	0	0	0	0	0	0	0	0	161.202	282.81	575.819	1048.94	1833.82	2516	3194.51	3825.34	4294.8	4874.29	6128.62	6862.15	7650.69	8644.62	10375.7	11630.1	14197.4
135, 1-2 Zamárdi		10376	9938.96	9452.63	9366.44	8178.32	6990.21	6023.7	5100.29	3736.73	3034.94	3253.48	2243.88	1628.28	791.054	0	0	0	0	0	0	0	0	0	0	0	0	0	0	0	0	0	175.448	307.803	626.705	1141.64	1995.88	2738.34	3476.82	4163.4	4674.34	5305.04	6670.22	7468.57	8326.79	9408.56	11292.7	12657.8	15452.1
136, 1-2 Zamárdi		6313.33	6047.38	5751.48	5699.04	4976.12	4253.21	3665.14	3103.29	2273.62	1846.62	1979.59	1365.3	990.73	481.319	0	0	0	0	0	0	0	0	0	0	0	0	0	0	0	0	0	106.752	187.284	381.32	694.634	1214.4	1666.15	2115.48	2533.23	2844.12	3227.86	4058.51	4544.27	5066.46	5724.66	6871.05	7701.7	9401.85
137, 1-2 Zamárdi		4000.64	3832.12	3644.61	3611.38	3153.28	2695.18	2322.53	1966.5	1440.75	1170.17	1254.43	865.164	627.808	305.003	0	0	0	0	0	0	0	0	0	0	0	0	0	0	0	0	0	67.6466	118.678	241.636	440.177	769.541	1055.81	1340.54	1605.26	1802.27	2045.44	2571.81	2879.62	3210.53	3627.62	4354.06	4880.43	5957.79
138, 1-2 Siófok		18129	17365.4	16515.7	16365.1	14289.2	12213.3	10524.6	8911.25	6528.82	5302.65	5684.48	3920.52	2844.93	1382.13	0	0	0	0	0	0	0	0	0	0	0	0	0	0	0	0	0	306.543	537.794	1094.98	1994.68	3487.2	4784.44	6074.7	7274.3	8167.02	9268.98	11654.2	13049.1	14548.6	16438.7	19730.6	22115.8	26997.9
139, 1-2 Siófok beton a 142-be mérve		9226.71	8838.04	8405.58	8328.94	7272.43	6215.92	5356.47	4535.35	3322.82	2698.76	2893.1	1995.33	1447.92	703.43	0	0	0	0	0	0	0	0	0	0	0	0	0	0	0	0	0	156.014	273.708	557.286	1015.18	1774.8	2435.02	3091.7	3702.23	4156.58	4717.41	5931.37	6641.29	7404.45	8366.39	10041.8	11255.8	13740.5
142, 1-2 Siófok beton a 139-ről is ide mérve		12583	12053	11463.2	11358.7	9917.87	8477.03	7304.96	6185.14	4531.54	3680.47	3945.5	2721.16	1974.61	959.312	0	0	0	0	0	0	0	0	0	0	0	0	0	0	0	0	0	212.766	373.273	760.006	1384.47	2420.4	3320.79	4216.34	5048.96	5668.58	6433.43	8088.98	9057.14	10097.9	11409.8	13694.6	15350.2	18738.8
143, Siófok		3246.85	3110.08	2957.9	2930.93	2559.15	2187.36	1884.93	1595.98	1169.29	949.687	1018.07	702.152	509.518	247.535	0	0	0	0	0	0	0	0	0	0	0	0	0	0	0	0	0	54.9008	96.3172	196.107	357.24	624.546	856.877	1087.96	1302.8	1462.69	1660.04	2087.23	2337.05	2605.61	2944.11	3533.68	3960.87	4835.24
144, 1-2 Siófok		9938.78	9520.11	9054.28	8971.73	7833.68	6695.63	5769.86	4885.36	3579.26	2907.04	3116.37	2149.32	1559.66	757.717	0	0	0	0	0	0	0	0	0	0	0	0	0	0	0	0	0	168.054	294.832	600.295	1093.53	1911.77	2622.94	3330.3	3987.95	4477.36	5081.48	6389.12	7153.83	7975.89	9012.07	10816.8	12124.4	14800.9
145, 1-2 Siófok (Szabadi)		15903.7	15597.4	15256.5	15196	14363.2	13530.4	12852.9	12205.6	11249.8	10757.8	10911	10203.3	9771.82	9184.95	8444.89	8198.92	8045.73	7920.59	7674.62	7335.87	7521.43	7521.43	7273.3	7551.64	8075.93	7983.16	8136.35	8414.68	8630.44	8630.44	8630.44	8753.42	8846.2	11631.7	11992.7	12591.5	13111.9	13629.6	14110.8	14469	14911.1	15868	16427.7	17029.3	17787.5	19108.2	20065.2	22023.9
146, 2-3 Siófok		0	0	0	0	0	0	0	0	0	0	0	0	0	0	0	0	0	0	0	0	0	0	0	0	0	0	0	0	0	0	0	0	0	0	0	0	0	0	0	0	0	0	0	0	0	0	0	0
147, 1-2 Balatonvilágos		27042.8	26521.8	25942.2	25839.4	24423.3	23007.1	21855.1	20754.5	19129.2	18292.7	18553.2	17349.8	16616	15618.1	14359.7	13941.5	13681	13468.2	13050	12474	12789.5	12789.5	12367.6	12840.8	13732.4	13574.6	13835.1	14308.4	14675.2	14675.2	14675.2	14884.4	15042.1	19778.6	20392.4	21410.6	22295.6	23175.8	23994.1	24603.1	25354.9	26982.1	27933.7	28956.6	30246	32491.8	34119	37449.5
148, 1-2 Balatonvilágos		22754.6	22316.2	21828.5	21742	20550.4	19358.8	18389.5	17463.4	16095.8	15392	15611.2	14598.6	13981.2	13141.5	12082.7	11730.8	11511.6	11332.5	10980.6	10495.9	10761.4	10761.4	10406.4	10804.6	11554.8	11422.1	11641.2	12039.5	12348.2	12348.2	12348.2	12524.1	12656.9	16642.3	17158.7	18015.5	18760.1	19500.8	20189.3	20701.8	21334.3	22703.5	23504.2	24364.9	25449.9	27339.5	28708.7	31511.1
148, 2-3 Balatonvilágos		14332.7	14056.6	13749.3	13694.9	12944.3	12193.8	11583.2	10999.9	10138.5	9695.13	9833.18	9195.4	8806.5	8277.61	7610.65	7388.98	7250.93	7138.15	6916.48	6611.2	6778.42	6778.42	6554.81	6805.64	7278.15	7194.54	7332.59	7583.43	7777.88	7777.88	7777.88	7888.71	7972.33	10482.7	10808	11347.6	11816.6	12283.2	12716.9	13039.7	13438.1	14300.5	14804.8	15347	16030.4	17220.6	18083	19848.2
Rip-Rap	SUM	775670	754584	731122	726965	669647	612329	565703	521156	455374	421518	432061	383356	353658	313268	269296	261594	256797	252878	245176	235027	240443	240443	233200	241325	257743	254838	259634	268350	275106	275106	275106	283570	289955	387006	411847	453058	488876	524502	557624	582273	612699	678558	717073	758475	810662	901556	967415	1.10222e+06
Reedbelts
	Date	05.2003.	05.2003.	06.2003.	06.2003.	06.2003.	06.2003.	07.2003.	07.2003.	07.2003.	07.2003.	07.2003.	08.2003.	08.2003.	08.2003.	08.2003.	09.2003.	09.2003.	09.2003.	09.2003.	09.2003.	10.2003.	10.2003.	10.2003.	10.2003.	11.2003.	11.2003.	11.2003.	11.2003.	12.2003.	12.2003.	12.2003.	12.2003.	12.2003.	01.2004.	01.2004.	01.2004.	01.2004.	02.2004.	02.2004.	02.2004.	02.2004.	03.2004.	03.2004.	03.2004.	03.2004.	03.2004.	04.2004.	04.2004.
Number of the ortophoto, region	Water Level	63.7143	62.2857	60.7143	60.4286	56.5714	52.7143	49.5714	46.5714	42.1429	39.8571	40.5714	37.2857	35.2857	32.5714	29.1429	28	27.2857	26.7143	25.5714	24	24.8571	24.8571	23.7143	25	27.4286	27	27.7143	29	30	30	30	30.5714	31	31.5714	32.8571	35	36.8571	38.7143	40.4286	41.7143	43.2857	46.7143	48.7143	50.8571	53.5714	58.2857	61.7143	68.7143
53 Zala torok		533293	527135	520361	519129	502502	485876	472328	459396	440305	430452	433532	419368	410746	399046	384267	379340	376261	373798	368871	362097	365792	365792	360866	366408	376877	375029	378108	383651	387961	387961	387961	390425	392272	511914	519101	531081	541463	551845	561428	568616	577400	596567	607748	619727	634901	661255	680422	719554
55, 3 Keszthely		198351	196061	193541	193083	186899	180715	175676	170866	163766	160101	161246	155978	152772	148420	142923	141091	139945	139029	137197	134677	136052	136052	134219	136281	140174	139487	140632	142694	144297	144297	144297	145213	145900	190400	193073	197528	201390	205251	208816	211489	214756	221885	226044	230499	236143	245945	253074	267629
55, 1-2 Keszthely		32691.9	32314.4	31899.2	31823.7	30804.4	29785.2	28954.6	28161.9	26991.6	26387.6	26576.4	25708.1	25179.6	24462.3	23556.3	23254.3	23065.6	22914.6	22612.6	22197.3	22423.8	22423.8	22121.8	22461.6	23103.3	22990.1	23178.8	23518.6	23782.8	23782.8	23782.8	23933.8	24047.1	31381.4	31822	32556.3	33192.8	33829.2	34416.7	34857.3	35395.8	36570.8	37256.2	37990.5	38920.7	40536.3	41711.3	44110.1
57, 2-3 Keszthely		8802.74	8701.09	8589.27	8568.94	8294.49	8020.04	7796.42	7582.96	7267.85	7105.21	7156.03	6922.24	6779.94	6586.8	6342.85	6261.53	6210.71	6170.05	6088.73	5976.91	6037.9	6037.9	5956.59	6048.07	6220.87	6190.38	6241.2	6332.68	6403.84	6403.84	6403.84	6444.5	6474.99	8449.84	8568.48	8766.22	8937.59	9108.95	9267.14	9385.78	9530.79	9847.16	10031.7	10229.4	10479.9	10914.9	11231.3	11877.2
58 + 59, 2-3 Gyenesdiás		166628	164534	162232	161813	156161	150509	145904	141508	135019	131669	132716	127901	124971	120994	115970	114295	113248	112411	110736	108434	109690	109690	108015	109899	113458	112830	113876	115760	117226	117226	117226	118063	118691	155010	157454	161526	165055	168584	171842	174285	177271	183787	187587	191659	196817	205776	212291	225593
60, 2-3 Vonyarcvashegy		102678	101388	99968.9	99710.9	96228.1	92745.3	89907.5	87198.7	83199.9	81136	81781	78814.2	77008.3	74557.4	71461.6	70429.7	69784.7	69268.8	68236.8	66817.9	67591.9	67591.9	66559.9	67720.9	69913.7	69526.8	70171.7	71332.6	72235.6	72235.6	72235.6	72751.6	73138.5	95519.1	97024.6	99533.9	101709	103883	105891	107396	109236	113251	115593	118102	121281	126801	130816	139013
61, 1-2-3 Balatongyörök		256626	253402	249856	249211	240507	231802	224709	217939	207945	202786	204398	196983	192470	186344	178607	176028	174416	173126	170547	167001	168935	168935	166356	169257	174738	173771	175383	178284	180541	180541	180541	181831	182798	238734	242497	248769	254204	259639	264656	268419	273018	283053	288906	295178	303122	316919	326953	347440
62 + 63, 2-3 Balatongyörök, alulról a 3. utcától délre, kis maradék rész		27866.2	27516.1	27131.1	27061	26115.8	25170.6	24400.5	23665.3	22580	22019.9	22195	21389.8	20899.7	20234.5	19394.3	19114.3	18939.2	18799.2	18519.1	18134.1	18344.1	18344.1	18064	18379.1	18974.2	18869.2	19044.3	19359.3	19604.4	19604.4	19604.4	19744.4	19849.4	25923.4	26332	27013	27603.2	28193.4	28738.2	29146.8	29646.2	30735.8	31371.4	32052.4	32915	34413.2	35502.8	37727.4
63, 1-2 Afrikapark		250119	246977	243521	242892	234408	225925	219012	212413	202672	197645	199216	191989	187590	181619	174078	171564	169993	168736	166223	162766	164652	164652	162138	164966	170307	169365	170936	173764	175963	175963	175963	177220	178163	232681	236349	242461	247759	253056	257946	261614	266096	275876	281581	287693	295436	308883	318663	338631
64 + 65 Balatoneerics		383523	378705	373405	372441	359433	346424	335824	325706	310769	303060	305469	294388	287642	278488	266924	263070	260661	258734	254879	249579	252470	252470	248616	252952	261143	259697	262106	266443	269815	269815	269815	271743	273188	356784	362408	371780	379903	388026	395524	401148	408021	423017	431765	441138	453009	473629	488625	519243
66, 2-3 Szigliget		97113.8	95893.8	94551.8	94307.8	91013.7	87719.6	85035.6	82473.5	78691.5	76739.4	77349.4	74543.4	72835.4	70517.3	67589.3	66613.2	66003.2	65515.2	64539.2	63197.2	63929.2	63929.2	62953.2	64051.2	66125.2	65759.2	66369.2	67467.3	68321.3	68321.3	68321.3	68809.3	69175.3	90343.1	91767	94140.3	96197.2	98254	100153	101577	103317	107114	109329	111703	114709	119930	123727	131480
67, 2-3 Szigliget - Balatontördemic, óriási hajdani nádas és lápvidék		113780	112351	110779	110493	106633	102774	99629.2	96627.5	92196.3	89909.3	90624	87336.4	85335.2	82619.3	79188.8	78045.3	77330.6	76758.8	75615.3	74042.9	74900.6	74900.6	73757.1	75043.5	77473.5	77044.7	77759.4	79045.8	80046.4	80046.4	80046.4	80618.2	81047	105848	107516	110296	112706	115116	117341	119009	121048	125497	128092	130873	134395	140512	144961	154044
68, 2-3 Badacsony		134240	132553	130698	130361	125807	121254	117544	114002	108775	106076	106919	103041	100680	97475.5	93428.1	92078.9	91235.7	90561.1	89212	87356.9	88368.8	88368.8	87019.7	88537.4	91404.4	90898.4	91741.6	93259.4	94439.9	94439.9	94439.9	95114.5	95620.4	124880	126849	130129	132973	135816	138440	140409	142814	148063	151125	154406	158561	165778	171027	181744
69, 1-2 Badacsony		173247	171071	168677	168241	162365	156488	151700	147130	140383	136900	137988	132983	129935	125800	120577	118835	117747	116877	115135	112741	114047	114047	112306	114265	117965	117312	118400	120359	121883	121883	121883	122753	123406	161169	163709	167943	171612	175281	178668	181209	184314	191088	195039	199273	204636	213951	220725	234555
72, 2-3 Badacsonyörs		150042	148309	146404	146057	141379	136701	132889	129251	123880	121108	121974	117989	115564	112272	108113	106727	105861	105168	103782	101876	102916	102916	101530	103089	106034	105515	106381	107940	109153	109153	109153	109846	110366	144027	146049	149420	152341	155261	157958	159980	162452	167844	170990	174360	178629	186044	191437	202447
73, 1-2 Ábrahámhegy		131311	129795	128127	127824	123730	119636	116300	113116	108415	105989	106747	103260	101137	98256.1	94616.9	93403.9	92645.8	92039.2	90826.2	89158.3	90068.1	90068.1	88855	90219.7	92797.4	92342.5	93100.7	94465.3	95526.7	95526.7	95526.7	96133.2	96588.1	126047	127817	130767	133323	135879	138239	140009	142172	146891	149644	152594	156330	162819	167539	177174
73, 2-3 Ábrahámhegy		119397	118019	116502	116226	112504	108781	105748	102853	98578.7	96372.7	97062.1	93891	91960.8	89341.2	86032.3	84929.3	84240	83688.5	82585.5	81068.9	81896.1	81896.1	80793.2	82034	84377.8	83964.2	84653.6	85894.4	86859.5	86859.5	86859.5	87411	87824.7	114611	116220	118902	121226	123551	125696	127306	129272	133564	136067	138749	142146	148046	152338	161099
74, 2-3 Kővágóörs		137597	136008	134261	133943	129653	125363	121867	118531	113605	111063	111857	108203	105978	102960	99146.2	97875.1	97080.7	96445.1	95174	93426.3	94379.6	94379.6	93108.5	94538.5	97239.6	96762.9	97557.4	98987.4	100100	100100	100100	100735	101212	132081	133936	137026	139705	142384	144856	146711	148978	153923	156808	159898	163813	170613	175559	185655
75, 2-3 Révfülöp		79493.2	78575.3	77565.6	77382	74903.5	72425.1	70405.7	68478	65632.4	64163.7	64622.7	62511.4	61226.3	59482.2	57279.2	56544.8	56085.9	55718.7	54984.3	53974.6	54525.4	54525.4	53791	54617.2	56177.7	55902.3	56361.2	57187.4	57829.9	57829.9	57829.9	58197.1	58472.5	76306.4	77377.8	79163.4	80711	82258.5	83687.1	84758.4	86067.9	88924.9	90591.5	92377.2	94639	98567.4	101424	107258
76, 2-3 Balatonszepezd		100980	99813.7	98531.1	98297.9	95149.5	92001.2	89435.9	86987.2	83372.4	81506.8	82089.8	79407.9	77775.4	75559.9	72761.4	71828.6	71245.5	70779.1	69846.3	68563.6	69263.3	69263.3	68330.4	69379.9	71362.1	71012.3	71595.4	72644.8	73461	73461	73461	73927.4	74277.3	96931.6	98292.5	100561	102527	104493	106307	107668	109332	112961	115078	117346	120219	125210	128839	136249
77, 1-2 Balatonszepezd		37184.3	36754.9	36282.6	36196.7	35037.4	33878	32933.4	32031.7	30700.6	30013.6	30228.3	29240.7	28639.6	27823.8	26793.3	26449.8	26235.1	26063.3	25719.8	25247.5	25505.1	25505.1	25161.6	25548.1	26278	26149.2	26363.9	26750.3	27050.9	27050.9	27050.9	27222.7	27351.5	35693.6	36194.7	37030	37753.9	38477.8	39146	39647.2	40259.7	41596.1	42375.7	43210.9	44268.9	46106.5	47442.9	50171.5
78, 2-3 Zánka		118014	116651	115152	114880	111200	107521	104523	101661	97436.6	95256.2	95937.6	92803.3	90895.4	88306.2	85035.6	83945.4	83264	82718.9	81628.7	80129.7	80947.4	80947.4	79857.2	81083.6	83400.3	82991.5	83672.9	84899.3	85853.3	85853.3	85853.3	86398.4	86807.2	113283	114874	117525	119822	122120	124240	125831	127775	132016	134491	137141	140499	146331	150573	159233
79, 2-3 Vérkút		101800	100625	99331.8	99096.7	95922.8	92748.9	90162.7	87694.1	84050	82169.1	82756.9	80053.2	78407.5	76174	73352.7	72412.3	71824.5	71354.3	70413.9	69120.8	69826.1	69826.1	68885.7	69943.7	71942.1	71589.4	72177.2	73235.2	74058	74058	74058	74528.2	74880.9	97719.3	99091.3	101378	103360	105342	107171	108543	110220	113879	116013	118300	121196	126227	129886	137356
80, 2-3 Balatonakali		143373	141718	139897	139565	135095	130625	126983	123506	118374	115725	116553	112745	110427	107282	103308	101984	101156	100494	99169.3	97348.2	98341.5	98341.5	97017.1	98507.1	101322	100825	101653	103143	104302	104302	104302	104964	105461	137626	139558	142779	145570	148361	150937	152870	155231	160384	163390	166611	170690	177775	182928	193449
81, 2-3 Balatonakali		200625	198308	195760	195297	189042	182786	177690	172825	165643	161936	163095	157766	154523	150121	144561	142708	141549	140623	138769	136221	137611	137611	135758	137843	141781	141086	142244	144329	145951	145951	145951	146878	147573	192582	195286	199793	203698	207604	211209	213913	217218	224429	228635	233141	238850	248764	255975	270696
82, 2-3 Balatonudvari		257576	254602	251330	250735	242705	234674	228130	221884	212664	207905	209392	202551	198387	192736	185598	183218	181731	180541	178162	174890	176675	176675	174295	176972	182028	181136	182623	185300	187382	187382	187382	188572	189464	247250	250722	256508	261522	266537	271165	274637	278880	288137	293537	299323	306652	319381	328638	347539
83, 2-3 Örvényes		1.23078e+06	1.21657e+06	1.20093e+06	1.19809e+06	1.15972e+06	1.12134e+06	1.09008e+06	1.06023e+06	1.01617e+06	993434	1.00054e+06	967852	947955	920951	886842	875472	868366	862681	851312	835678	844205	844205	832836	845627	869787	865524	872630	885421	895369	895369	895369	901054	905318	1.18144e+06	1.19802e+06	1.22567e+06	1.24963e+06	1.27359e+06	1.29571e+06	1.3123e+06	1.33257e+06	1.37681e+06	1.40261e+06	1.43026e+06	1.46528e+06	1.5261e+06	1.57033e+06	1.66065e+06
84, 1-2 Tihany		297363	294300	290932	290319	282051	273782	267045	260614	251120	246220	247751	240708	236420	230602	223252	220802	219271	218046	215596	212227	214065	214065	211615	214371	219577	218658	220189	222946	225089	225089	225089	226314	227233	296276	299851	305808	310971	316134	320900	324474	328843	338375	343935	349892	357438	370544	380076	399536
85, 2-3 Tihany		270999	268208	265138	264580	257045	249509	243369	237508	228856	224391	225786	219367	215460	210157	203459	201226	199831	198714	196481	193411	195086	195086	192853	195365	200110	199272	200668	203180	205133	205133	205133	206250	207087	270009	273267	278696	283401	288106	292450	295707	299688	308375	313442	318871	325748	337692	346379	364114
85, 1-2 Tihany		1185.73	1173.52	1160.09	1157.65	1124.68	1091.7	1064.84	1039.2	1001.34	981.802	987.907	959.821	942.725	919.523	890.216	880.446	874.341	869.456	859.687	846.254	853.581	853.581	843.812	854.802	875.562	871.898	878.004	888.994	897.542	897.542	897.542	902.427	906.09	1181.4	1195.65	1219.41	1240	1260.58	1279.59	1293.84	1311.26	1349.27	1371.44	1395.19	1425.28	1477.54	1515.55	1593.15
87, 2-3 Tihany (Óvár)		50123.3	49607.1	49039.3	48936	47542.3	46148.5	45012.9	43928.9	42328.6	41502.7	41760.8	40573.6	39850.9	38870.1	37631.2	37218.2	36960.1	36753.6	36340.7	35772.9	36082.6	36082.6	35669.6	36134.2	37011.8	36856.9	37115	37579.6	37940.9	37940.9	37940.9	38147.4	38302.3	49940.2	50542.7	51546.8	52417.1	53287.4	54090.7	54693.2	55429.6	57036.2	57973.4	58977.6	60249.5	62458.7	64065.3	67345.6
86, 2-3 Tihany (Diós)		118877	117653	116306	116061	112755	109450	106757	104186	100390	98431.5	99043.6	96227.8	94513.8	92187.7	89249.5	88270	87657.9	87168.2	86188.8	84842.1	85576.6	85576.6	84597.2	85699.1	87780.3	87413	88025.2	89127	89984	89984	89984	90473.7	90841	118443	119871	122253	124317	126381	128286	129715	131462	135272	137495	139876	142893	148133	151943	159723
86, 1-2 Tihany (Diós)		139307	137872	136294	136007	132134	128260	125104	122091	117643	115348	116065	112766	110757	108031	104588	103440	102723	102149	101001	99423	100284	100284	99136.1	100427	102866	102436	103153	104444	105449	105449	105449	106023	106453	138798	140473	143263	145682	148101	150334	152008	154055	158520	161125	163916	167451	173591	178056	187173
88-89, 2-3 Balatonfüred		27003.9	26725.8	26419.9	26364.2	25613.4	24862.5	24250.7	23666.6	22804.5	22359.5	22498.6	21859	21469.6	20941.2	20273.8	20051.3	19912.2	19801	19578.5	19272.6	19439.5	19439.5	19217	19467.3	19940	19856.6	19995.7	20246	20440.6	20440.6	20440.6	20551.9	20635.3	26905.2	27229.8	27770.8	28239.7	28708.5	29141.3	29465.9	29862.6	30728.2	31233.1	31774.1	32459.4	33649.6	34515.1	36282.4
89, 1-2 Balatonfüred		281925	279021	275827	275247	267407	259568	253180	247083	238083	233437	234889	228211	224146	218629	211661	209338	207887	206725	204403	201209	202951	202951	200628	203241	208177	207306	208758	211371	213403	213403	213403	214565	215436	280895	284283	289931	294826	299721	304240	307629	311770	320807	326079	331727	338881	351306	360343	378793
91-92, 2-2-3 Csopak		358642	353702	348268	347280	333942	320604	309736	299363	284049	276145	278615	267253	260337	250951	239095	235143	232673	230697	226745	221311	224275	224275	220323	224769	233167	231685	234155	238601	242059	242059	242059	244035	245517	320962	326728	336337	344666	352994	360682	366447	373494	388870	397839	407448	419621	440762	456137	487529
92-93, 3-2-3 Alsóörs		168714	166391	163834	163369	157095	150820	145708	140828	133624	129905	131067	125722	122469	118054	112476	110617	109455	108526	106667	104110	105505	105505	103645	105737	109688	108990	110152	112244	113871	113871	113871	114800	115497	150989	153701	158222	162139	166057	169674	172386	175701	182934	187153	191674	197400	207346	214579	229346
93, 1-2 Alsóörs		344865	340115	334890	333940	321114	308289	297838	287863	273137	265537	267912	256986	250336	241311	229910	226110	223735	221835	218035	212809	215660	215660	211859	216135	224210	222785	225160	229435	232760	232760	232760	234660	236085	308632	314177	323417	331425	339434	346826	352371	359147	373932	382556	391797	403501	423830	438615	468801
95 Balatonalmádi		95836.5	94293.2	92595.6	92287	88120.2	83953.4	80558.2	77317.3	72533.2	70064	70835.6	67286.1	65125.6	62193.4	58489.6	57255	56483.3	55866	54631.4	52933.8	53859.8	53859.8	52625.2	54014.1	56637.6	56174.7	56946.3	58335.2	59415.5	59415.5	59415.5	60032.8	60495.8	79254.7	81056	84058	86659.8	89261.6	91663.3	93464.5	95666	100469	103271	106273	110076	116681	121484	131291
96-97, 1-2 Vörösberény		155473	152970	150216	149715	142955	136196	130688	125430	117669	113663	114915	109157	105652	100895	94886.2	92883.3	91631.5	90630.1	88627.2	85873.3	87375.4	87375.4	85372.6	87625.8	91881.9	91130.8	92382.6	94635.9	96388.4	96388.4	96388.4	97389.8	98140.9	128573	131495	136365	140586	144807	148703	151625	155197	162989	167535	172405	178574	189288	197080	212990
96-97,2-3 Budatava		24874.8	24474.2	24033.6	23953.5	22872	21790.5	20909.3	20068.1	18826.3	18185.4	18385.7	17464.4	16903.6	16142.6	15181.2	14860.8	14660.5	14500.3	14179.8	13739.2	13979.6	13979.6	13659.1	14019.6	14700.6	14580.4	14780.7	15141.2	15421.6	15421.6	15421.6	15581.8	15702	20570.9	21038.5	21817.7	22493	23168.3	23791.6	24259.2	24830.6	26077.3	26804.5	27583.7	28570.7	30285	31531.7	34077.1
98,2-3 Fűzfő, a Balaton sarka		100247	98795.8	97200	96909.8	92992.8	89075.8	85884.2	82837.6	78340.3	76019.1	76744.5	73407.8	71376.7	68620.3	65138.5	63977.9	63252.5	62672.2	61511.6	59915.8	60786.3	60786.3	59625.7	60931.3	63397.6	62962.4	63687.8	64993.4	66008.9	66008.9	66008.9	66589.2	67024.5	87673.5	89366.7	92188.8	94634.6	97080.5	99338.2	101031	103101	107616	110250	113072	116647	122856	127371	136590
99, 2-3 Fűzfő		101382	99915.1	98301.2	98007.8	94046.4	90085	86857.2	83776.1	79227.9	76880.4	77614	74239.4	72185.4	69397.7	65876.5	64702.8	63969.2	63382.3	62208.5	60594.6	61475	61475	60301.2	61621.7	64115.9	63675.7	64409.3	65729.8	66756.8	66756.8	66756.8	67343.7	67783.8	88666.8	90379.2	93233.3	95706.8	98180.4	100464	102176	104269	108836	111499	114353	117969	124248	128814	138138
102, 2-3 Balatonkenese		141208	139508	137639	137299	132711	128123	124385	120817	115549	112830	113680	109772	107393	104164	100086	98726.4	97876.8	97197.1	95837.7	93968.5	94988	94988	93628.6	95158	98046.7	97536.9	98386.5	99915.9	101105	101105	101105	101785	102295	133543	135526	138832	141696	144561	147206	149189	151613	156902	159987	163292	167479	174752	180040	190838
103, 2-3 Balatonkenese		7689.95	7597.41	7495.62	7477.11	7227.25	6977.4	6773.82	6579.48	6292.62	6144.55	6190.82	5977.98	5848.43	5672.61	5450.52	5376.48	5330.22	5293.2	5219.17	5117.38	5172.9	5172.9	5098.87	5182.15	5339.47	5311.71	5357.98	5441.26	5506.04	5506.04	5506.04	5543.05	5570.82	7272.53	7380.54	7560.55	7716.56	7872.58	8016.59	8124.59	8256.6	8544.63	8712.64	8892.65	9120.67	9516.7	9804.72	10392.8
104, 2-3 Akarattya		15195.2	15012.3	14811.2	14774.6	14280.9	13787.2	13384.9	13001	12434.1	12141.5	12233	11812.4	11556.4	11209	10770.1	10623.8	10532.4	10459.3	10313	10111.9	10221.6	10221.6	10075.3	10239.8	10550.7	10495.8	10587.3	10751.8	10879.8	10879.8	10879.8	10953	11007.8	14370.4	14583.8	14939.5	15247.8	15556.1	15840.6	16054.1	16314.9	16884	17216	17571.7	18022.3	18804.8	19374	20535.9
106, 1-2 Aliga		42008.4	41429.8	40793.3	40677.5	39115.2	37553	36280	35064.9	33271.1	32345.3	32634.6	31303.8	30493.7	29394.3	28005.6	27542.7	27253.4	27021.9	26559	25922.5	26269.7	26269.7	25806.8	26327.6	27311.2	27137.6	27427	27947.7	28352.8	28352.8	28352.8	28584.2	28757.8	37594.8	38270.2	39395.8	40371.3	41346.8	42247.3	42922.6	43748.1	45549	46599.6	47725.1	49150.9	51627.2	53428.2	57105.1
106, 2-3 Aliga		0	0	0	0	0	0	0	0	0	0	0	0	0	0	0	0	0	0	0	0	0	0	0	0	0	0	0	0	0	0	0	0	0	0	0	0	0	0	0	0	0	0	0	0	0	0	0	0
108,1-2 Balatonszentgyörgy		19759.5	19511.2	19238.2	19188.5	18518.3	17848.1	17302	16780.7	16011.1	15614	15738.1	15167.1	14819.6	14348	13752.2	13553.6	13429.5	13330.2	13131.6	12858.6	13007.5	13007.5	12808.9	13032.3	13454.3	13379.8	13504	13727.4	13901.1	13901.1	13901.1	14000.4	14074.9	18381.8	18671.6	19154.5	19573	19991.5	20377.8	20667.5	21021.6	21794.2	22244.9	22727.8	23339.5	24401.8	25174.4	26751.9
110, 1-2 Balatonberény		145824	143992	141977	141611	136664	131718	127688	123841	118162	115231	116146	111933	109368	105887	101491	100025	99109.2	98376.4	96910.9	94895.7	95994.9	95994.9	94529.3	96178.1	99292.4	98742.8	99658.8	101308	102590	102590	102590	103323	103872	135657	137796	141359	144448	147536	150387	152526	155139	160841	164167	167731	172245	180085	185787	197428
111,1 Balatonberény		100907	99639	98244.6	97991	94568.3	91145.6	88356.7	85694.6	81764.8	79736.6	80370.4	77454.8	75680	73271.4	70229	69214.9	68581	68074	67059.8	65665.4	66426	66426	65411.9	66552.8	68707.8	68327.5	68961.4	70102.3	70989.6	70989.6	70989.6	71496.7	71877	93871.5	95351.1	97817.1	99954.2	102091	104064	105544	107352	111298	113599	116065	119189	124614	128560	136615
112, 1-2 Balatonmáriafürdő		296179	291125	285565	284554	270908	257261	246142	235528	219860	211773	214300	202675	195600	185996	173866	169823	167296	165274	161231	155671	158703	158703	154660	159209	167801	166285	168812	173361	176899	176899	176899	178920	180437	236622	242521	252353	260874	269395	277260	283160	290370	306101	315277	325109	337563	359193	374924	407042
113, 1-2 Balatonmáriafürdő		184216	181073	177615	176986	168498	160010	153094	146493	136748	131718	133290	126059	121658	115685	108141	105626	104054	102796	100282	96823.5	98709.7	98709.7	96194.8	99024.1	104368	103425	104997	107826	110027	110027	110027	111284	112227	147173	150842	156957	162257	167557	172449	176118	180603	190387	196095	202210	209956	223409	233194	253170
114, 1-2 Balatonmáriafürdő		253397	249073	244316	243451	231776	220101	210587	201507	188102	181183	183345	173399	167346	159130	148752	145292	143130	141401	137941	133185	135779	135779	132320	136212	143563	142265	144427	148319	151346	151346	151346	153076	154373	202442	207489	215901	223191	230481	237211	242258	248426	261885	269736	278148	288803	307309	320767	348246
115, 1-2 Balatonfenyves		212728	209098	205105	204379	194577	184776	176790	169166	157913	152104	153919	145570	140488	133590	124878	121974	120159	118707	115803	111809	113987	113987	111083	114351	120522	119433	121248	124515	127056	127056	127056	128508	129597	169952	174189	181250	187371	193491	199140	203377	208556	219854	226445	233507	242452	257988	269286	292355
116, 1-2 Balatonfenyves		109209	107346	105296	104923	99891.1	94859.3	90759.3	86845.6	81068.3	78086.5	79018.3	74732	72122.9	68582	64109.2	62618.3	61686.5	60941	59450.1	57400.1	58518.3	58518.3	57027.4	58704.7	61872.9	61313.8	62245.6	63922.9	65227.4	65227.4	65227.4	65972.9	66532	87248.9	89424.1	93049.4	96191.3	99333.2	102233	104409	107067	112868	116251	119877	124469	132444	138245	150087
117, 1-2 Balatonfenyves		50354.8	49495.5	48550.2	48378.4	46058.3	43738.2	41847.7	40043.2	37379.4	36004.5	36434.2	34457.8	33254.8	31622.1	29559.8	28872.4	28442.7	28099	27411.5	26466.3	26981.9	26981.9	26294.5	27067.8	28528.6	28270.8	28700.5	29473.9	30075.4	30075.4	30075.4	30419.1	30676.9	40229.1	41232.1	42903.7	44352.4	45801.1	47138.3	48141.3	49367.1	52041.6	53601.7	55273.3	57390.6	61068.1	63742.6	69203.1
118, 1-2 Bélatelep		72302	71068.1	69710.9	69464.2	66132.8	62801.5	60087.1	57496.1	53671.2	51697.1	52314	49476.3	47748.9	45404.6	42443.5	41456.4	40839.5	40346	39358.9	38001.7	38742	38742	37754.9	38865.4	40962.9	40592.7	41209.6	42320.1	43183.8	43183.8	43183.8	43677.3	44047.4	57763.1	59203.2	61603.3	63683.4	65763.5	67683.6	69123.7	70883.8	74724	76964.1	79364.2	82404.4	87684.7	91524.9	99365.3
119, 1-2 Fonyód		36259	35640.3	34959.6	34835.9	33165.3	31494.6	30133.4	28834	26915.8	25925.8	26235.2	24812.1	23945.8	22770.2	21285.2	20790.2	20480.8	20233.3	19738.3	19057.6	19428.9	19428.9	18933.9	19490.8	20542.7	20357	20666.4	21223.3	21656.4	21656.4	21656.4	21903.9	22089.5	28967.9	29690.1	30893.7	31936.9	32980	33943	34665.1	35547.8	37473.7	38597.1	39800.7	41325.4	43973.4	45899.2	49831.2
120, 2-3 Fonyód		3255.94	3200.38	3139.26	3128.15	2978.13	2828.11	2705.88	2589.2	2416.95	2328.05	2355.84	2228.04	2150.26	2044.69	1911.34	1866.89	1839.11	1816.88	1772.43	1711.31	1744.65	1744.65	1700.2	1750.21	1844.66	1827.99	1855.78	1905.78	1944.68	1944.68	1944.68	1966.9	1983.57	2601.22	2666.07	2774.15	2867.83	2961.5	3047.97	3112.82	3192.08	3365.01	3465.89	3573.97	3710.88	3948.67	4121.6	4474.67
121, 1-2 Balatonboglár		6962.71	6843.89	6713.19	6689.43	6368.62	6047.81	5786.41	5536.9	5168.56	4978.45	5037.86	4764.58	4598.24	4372.49	4087.32	3992.27	3932.86	3885.33	3790.28	3659.58	3730.87	3730.87	3635.82	3742.75	3944.74	3909.1	3968.51	4075.44	4158.61	4158.61	4158.61	4206.14	4241.79	5562.61	5701.29	5932.42	6132.74	6333.05	6517.96	6656.64	6826.14	7195.95	7411.67	7642.81	7935.58	8444.07	8813.88	9568.92
122, 1-2 Balatonboglár		13294.3	13067.4	12817.8	12772.5	12159.9	11547.4	11048.3	10571.9	9868.61	9505.62	9619.06	9097.27	8779.66	8348.62	7804.14	7622.65	7509.22	7418.47	7236.98	6987.43	7123.55	7123.55	6942.06	7146.23	7531.9	7463.84	7577.28	7781.45	7940.26	7940.26	7940.26	8031	8099.06	10621	10885.8	11327.1	11709.6	12092	12445.1	12709.9	13033.5	13739.6	14151.5	14592.8	15151.8	16122.7	16828.8	18270.4
123, 1-2 Balatonboglár		18402.2	18088.1	17742.7	17679.9	16832	15984.1	15293.3	14633.8	13660.3	13157.9	13314.9	12592.6	12153	11556.3	10802.6	10551.4	10394.4	10268.8	10017.6	9672.12	9860.54	9860.54	9609.32	9891.94	10425.8	10331.6	10488.6	10771.2	10991	10991	10991	11116.7	11210.9	14701.8	15068.3	15679.2	16208.6	16738	17226.7	17593.2	18041.2	19018.6	19588.8	20199.6	20973.4	22317.3	23294.7	25290.3
124, 1-2 Balatonlelle		0	0	0	0	0	0	0	0	0	0	0	0	0	0	0	0	0	0	0	0	0	0	0	0	0	0	0	0	0	0	0	0	0	0	0	0	0	0	0	0	0	0	0	0	0	0	0	0
125, 1-2 Balatonlelle		11579.7	11382.1	11164.7	11125.2	10591.7	10058.1	9623.41	9208.43	8595.86	8279.69	8378.49	7924	7647.35	7271.9	6797.64	6639.56	6540.75	6461.71	6303.63	6086.26	6204.82	6204.82	6046.74	6224.59	6560.52	6501.23	6600.04	6777.88	6916.21	6916.21	6916.21	6995.25	7054.53	9251.19	9481.83	9866.23	10199.4	10532.5	10840	11070.7	11352.6	11967.6	12326.4	12710.8	13197.7	14043.4	14658.4	15914.1
126, 2-3 Balatonszemes		76316.4	75014.1	73581.5	73321.1	69804.8	66288.5	63423.4	60688.5	56651.3	54567.5	55218.7	52223.4	50400.1	47925.7	44800.1	43758.2	43107.1	42586.1	41544.3	40111.7	40893.1	40893.1	39851.2	41023.3	43237.3	42846.6	43497.8	44669.9	45581.5	45581.5	45581.5	46102.4	46493.1	60970.3	62490.3	65023.7	67219.3	69414.9	71441.7	72961.7	74819.5	78872.9	81237.4	83770.8	86979.8	92553.3	96606.7	104882
127, 1-2 Balatonöszöd		2289.89	2250.82	2207.83	2200.02	2094.51	1989	1903.03	1820.97	1699.84	1637.31	1656.85	1566.97	1512.27	1438.02	1344.24	1312.98	1293.44	1277.81	1246.55	1203.56	1227.01	1227.01	1195.75	1230.92	1297.35	1285.62	1305.16	1340.33	1367.68	1367.68	1367.68	1383.31	1395.04	1829.43	1875.04	1951.05	2016.93	2082.81	2143.62	2189.23	2244.98	2366.6	2437.55	2513.56	2609.85	2777.08	2898.71	3147.02
128, 1-2 Balatonszárszó		143067	140625	137940	137452	130860	124268	118897	113770	106201	102295	103516	97900.7	94482.7	89844	83984.6	82031.5	80810.8	79834.2	77881.1	75195.5	76660.4	76660.4	74707.2	76904.5	81054.9	80322.5	81543.2	83740.5	85449.5	85449.5	85449.5	86426	87158.5	114298	117148	121897	126013	130129	133928	136778	140261	147859	152292	157041	163057	173505	181104	196618
129, 1-2 Balatonszárszó		0	0	0	0	0	0	0	0	0	0	0	0	0	0	0	0	0	0	0	0	0	0	0	0	0	0	0	0	0	0	0	0	0	0	0	0	0	0	0	0	0	0	0	0	0	0	0	0
132, 1-2 Balatonföldvár		16168.1	15892.2	15588.7	15533.5	14788.5	14043.6	13436.6	12857.2	12001.9	11560.5	11698.4	11063.8	10677.6	10153.3	9491.16	9270.43	9132.48	9022.12	8801.39	8497.9	8663.44	8663.44	8442.72	8691.03	9160.07	9077.3	9215.25	9463.57	9656.7	9656.7	9656.7	9767.06	9849.84	12916.9	13238.9	13775.7	14240.8	14706	15135.3	15457.4	15850.9	16709.7	17210.6	17747.3	18427.2	19607.9	20466.7	22220
133, 1-2 Szántód		0	0	0	0	0	0	0	0	0	0	0	0	0	0	0	0	0	0	0	0	0	0	0	0	0	0	0	0	0	0	0	0	0	0	0	0	0	0	0	0	0	0	0	0	0	0	0	0
134, 1-2 Szántód		23346.9	22948.5	22510.2	22430.5	21354.8	20279.1	19402.6	18566	17330.9	16693.4	16892.6	15976.3	15418.5	14661.5	13705.3	13386.6	13187.4	13028	12709.3	12271.1	12510.1	12510.1	12191.4	12550	13227.3	13107.7	13306.9	13665.5	13944.4	13944.4	13944.4	14103.8	14223.3	18652.2	19117.2	19892.2	20563.9	21235.6	21855.6	22320.6	22889	24129	24852.3	25627.4	26609.1	28314.1	29554.1	32085.9
135, 1-2 Zamárdi		31524.7	30986.7	30395	30287.4	28834.9	27382.4	26198.8	25069.1	23401.4	22540.7	22809.7	21572.3	20819.2	19797.1	18506	18075.6	17806.6	17591.4	17161	16569.3	16892.1	16892.1	16461.7	16945.9	17860.4	17699	17968	18452.2	18828.7	18828.7	18828.7	19043.9	19205.3	25185.5	25813.4	26859.9	27766.9	28673.8	29511	30138.9	30906.3	32580.7	33557.4	34603.9	35929.5	38231.8	39906.1	43324.7
136, 1-2 Zamárdi		74706.3	73431.5	72029.2	71774.2	68332.1	64890	62085.3	59408.1	55456.1	53416.3	54053.7	51121.6	49336.8	46914.6	43854.9	42835	42197.6	41687.7	40667.8	39265.4	40030.4	40030.4	39010.5	40157.8	42325.1	41942.6	42580.1	43727.4	44619.8	44619.8	44619.8	45129.8	45512.2	59684	61172	63651.9	65801.2	67950.5	69934.4	71422.4	73241	77208.9	79523.5	82003.5	85144.7	90600.6	94568.5	102670
137, 1-2 Zamárdi		0	0	0	0	0	0	0	0	0	0	0	0	0	0	0	0	0	0	0	0	0	0	0	0	0	0	0	0	0	0	0	0	0	0	0	0	0	0	0	0	0	0	0	0	0	0	0	0
138, 1-2 Siófok		44308	43551.9	42720.2	42569	40527.5	38486	36822.5	35234.7	32890.8	31681	32059	30320	29261.4	27824.8	26010.2	25405.3	25027.2	24724.8	24119.9	23288.2	23741.8	23741.8	23136.9	23817.4	25102.8	24876	25254.1	25934.5	26463.8	26463.8	26463.8	26766.3	26993.1	35398.3	36280.8	37751.7	39026.4	40301.1	41477.8	42360.3	43438.9	45792.3	47165.1	48635.9	50499	53734.8	56088.2	60892.9
139, 1-2 Siófok beton a 142-be mérve		46755.3	45957.5	45079.8	44920.2	42766	40611.7	38856.4	37180.9	34707.5	33430.9	33829.8	31994.7	30877.7	29361.7	27446.8	26808.5	26409.6	26090.4	25452.1	24574.5	25053.2	25053.2	24414.9	25133	26489.4	26250	26648.9	27367	27925.5	27925.5	27925.5	28244.7	28484	37353.5	38284.8	39836.9	41182	42527.1	43768.8	44700.1	45838.2	48321.6	49770.2	51322.3	53288.3	56702.8	59186.2	64256.3
142, 1-2 Siófok beton a 139-ről is ide mérve		2740.72	2693.95	2642.5	2633.15	2506.87	2380.59	2277.69	2179.48	2034.49	1959.66	1983.04	1875.47	1810	1721.13	1608.88	1571.47	1548.08	1529.38	1491.96	1440.51	1468.57	1468.57	1431.16	1473.25	1552.76	1538.73	1562.11	1604.21	1636.95	1636.95	1636.95	1655.65	1669.69	2189.6	2244.19	2335.17	2414.02	2492.87	2565.65	2620.24	2686.96	2832.53	2917.44	3008.42	3123.66	3323.82	3469.39	3766.59
143, Siófok		10148.5	9975.34	9784.84	9750.2	9282.61	8815.01	8434.01	8070.33	7533.46	7256.37	7342.96	6944.64	6702.18	6373.13	5957.49	5818.95	5732.36	5663.08	5524.54	5334.04	5437.94	5437.94	5299.4	5455.26	5749.67	5697.72	5784.31	5940.18	6061.4	6061.4	6061.4	6130.68	6182.63	8107.8	8309.94	8646.82	8938.8	9230.77	9500.28	9702.41	9949.46	10488.5	10802.9	11139.8	11566.5	12307.7	12846.7	13947.2
144, 1-2 Siófok		1063.37	1045.22	1025.26	1021.63	972.638	923.643	883.722	845.614	789.361	760.327	769.4	727.664	702.259	667.781	624.23	609.713	600.64	593.382	578.865	558.904	569.792	569.792	555.275	571.606	602.455	597.011	606.084	622.416	635.118	635.118	635.118	642.377	647.821	849.541	870.721	906.02	936.613	967.206	995.446	1016.63	1042.51	1098.99	1131.94	1167.24	1211.95	1289.61	1346.09	1461.4
145, 1-2 Siófok		0	0	0	0	0	0	0	0	0	0	0	0	0	0	0	0	0	0	0	0	0	0	0	0	0	0	0	0	0	0	0	0	0	0	0	0	0	0	0	0	0	0	0	0	0	0	0	0
146, 2-3 Siófok		0	0	0	0	0	0	0	0	0	0	0	0	0	0	0	0	0	0	0	0	0	0	0	0	0	0	0	0	0	0	0	0	0	0	0	0	0	0	0	0	0	0	0	0	0	0	0	0
147, 1-2 Balatonvilágos		0	0	0	0	0	0	0	0	0	0	0	0	0	0	0	0	0	0	0	0	0	0	0	0	0	0	0	0	0	0	0	0	0	0	0	0	0	0	0	0	0	0	0	0	0	0	0	0
148, 1-2 Balatonvilágos		47302.9	46651.3	45934.6	45804.3	44045.1	42285.9	40852.5	39484.2	37464.4	36421.9	36747.7	35249.1	34336.9	33099	31535.3	31014	30688.2	30427.6	29906.4	29189.7	29580.6	29580.6	29059.3	29645.7	30753.4	30557.9	30883.7	31470.1	31926.2	31926.2	31926.2	32186.8	32382.3	42333	43093.5	44361	45459.4	46557.9	47571.9	48332.3	49261.8	51289.7	52472.7	53740.1	55345.6	58134	60161.9	64302.3
148, 2-3 Balatonvilágos		6301.61	6214.81	6119.33	6101.97	5867.62	5633.26	5442.3	5260.02	4990.95	4852.07	4895.47	4695.83	4574.31	4409.39	4201.08	4131.64	4088.24	4053.52	3984.08	3888.6	3940.68	3940.68	3871.24	3949.36	4096.92	4070.88	4114.28	4192.4	4253.15	4253.15	4253.15	4287.87	4313.91	5639.54	5740.85	5909.7	6056.03	6202.37	6337.45	6438.75	6562.58	6832.73	6990.33	7159.17	7373.05	7744.52	8014.67	8566.25
Reedbelts	SUM	1.00907e+07	9.95999e+06	9.81619e+06	9.79005e+06	9.43708e+06	9.08411e+06	8.79651e+06	8.52198e+06	8.11672e+06	7.90756e+06	7.97292e+06	7.67225e+06	7.48923e+06	7.24084e+06	6.9271e+06	6.82251e+06	6.75715e+06	6.70486e+06	6.60027e+06	6.45647e+06	6.53491e+06	6.53491e+06	6.43033e+06	6.54798e+06	6.77022e+06	6.731e+06	6.79637e+06	6.91402e+06	7.00553e+06	7.00553e+06	7.00553e+06	7.05782e+06	7.09704e+06	9.27164e+06	9.42422e+06	9.67852e+06	9.89892e+06	1.01193e+07	1.03228e+07	1.04753e+07	1.06618e+07	1.10687e+07	1.13061e+07	1.15604e+07	1.18825e+07	1.24419e+07	1.28488e+07	1.36796e+07
SUMMARY
Average Substrata area [m2]
Water level		63.7143	62.2857	60.7143	60.4286	56.5714	52.7143	49.5714	46.5714	42.1429	39.8571	40.5714	37.2857	35.2857	32.5714	29.1429	28	27.2857	26.7143	25.5714	24	24.8571	24.8571	23.7143	25	27.4286	27	27.7143	29	30	30	30	30.5714	31	31.5714	32.8571	35	36.8571	38.7143	40.4286	41.7143	43.2857	46.7143	48.7143	50.8571	53.5714	58.2857	61.7143	68.7143
Date		05.2003.	05.2003.	06.2003.	06.2003.	06.2003.	06.2003.	07.2003.	07.2003.	07.2003.	07.2003.	07.2003.	08.2003.	08.2003.	08.2003.	08.2003.	09.2003.	09.2003.	09.2003.	09.2003.	09.2003.	10.2003.	10.2003.	10.2003.	10.2003.	11.2003.	11.2003.	11.2003.	11.2003.	12.2003.	12.2003.	12.2003.	12.2003.	12.2003.	01.2004.	01.2004.	01.2004.	01.2004.	02.2004.	02.2004.	02.2004.	02.2004.	03.2004.	03.2004.	03.2004.	03.2004.	03.2004.	04.2004.	04.2004.
Boat pile		9847.73	9715.31	9569.65	9543.17	9185.64	8828.11	8536.79	8258.71	7848.22	7636.35	7702.56	7398	7212.61	6961.02	6643.21	6537.28	6471.07	6418.1	6312.17	6166.51	6245.96	6245.96	6140.02	6259.2	6484.31	6444.59	6510.8	6629.97	6722.66	6722.66	6722.66	6775.63	6815.36	8907.21	9061.76	9319.35	9542.6	9765.84	9971.91	10126.5	10315.4	10727.5	10967.9	11225.5	11551.8	12118.5	12530.6	13372.1
Pier pile		17404.3	17162.7	16896.9	16848.6	16196.2	15543.8	15012.2	14504.8	13755.8	13369.2	13490	12934.2	12596	12136.9	11557	11363.7	11242.9	11146.2	10952.9	10687.1	10832.1	10832.1	10638.8	10856.3	11267	11194.5	11315.4	11532.8	11702	11702	11702	11798.6	11871.1	15520.4	15802.4	16272.4	16679.8	17087.2	17463.2	17745.2	18089.9	18841.9	19280.6	19750.6	20346	21380.1	22132.1	23667.5
Concrete wall		55680.5	55374.5	55037.8	54976.6	54150.2	53323.8	52650.5	52007.7	51058.9	50569.2	50722.3	50018.3	49589.8	49008.3	48273.8	48028.9	47875.9	47753.5	47508.6	47171.9	47355.6	47355.6	47110.7	47386.2	47906.5	47814.7	47967.7	48243.2	48457.4	48457.4	48457.4	48579.8	48671.6	63278.7	63636	64231.4	64747.3	65263.3	65739.6	66096.9	66533.5	67486.1	68041.8	68637.2	69391.3	70701.2	71653.8	73598.7
Rip-Rap		775670	754584	731122	726965	669647	612329	565703	521156	455374	421518	432061	383356	353658	313268	269296	261594	256797	252878	245176	235027	240443	240443	233200	241325	257743	254838	259634	268350	275106	275106	275106	283570	289955	387006	411847	453058	488876	524502	557624	582273	612699	678558	717073	758475	810662	901556	967415	1.10222e+06
Reedbelts		1.00907e+07	9.95999e+06	9.81619e+06	9.79005e+06	9.43708e+06	9.08411e+06	8.79651e+06	8.52198e+06	8.11672e+06	7.90756e+06	7.97292e+06	7.67225e+06	7.48923e+06	7.24084e+06	6.9271e+06	6.82251e+06	6.75715e+06	6.70486e+06	6.60027e+06	6.45647e+06	6.53491e+06	6.53491e+06	6.43033e+06	6.54798e+06	6.77022e+06	6.731e+06	6.79637e+06	6.91402e+06	7.00553e+06	7.00553e+06	7.00553e+06	7.05782e+06	7.09704e+06	9.27164e+06	9.42422e+06	9.67852e+06	9.89892e+06	1.01193e+07	1.03228e+07	1.04753e+07	1.06618e+07	1.10687e+07	1.13061e+07	1.15604e+07	1.18825e+07	1.24419e+07	1.28488e+07	1.36796e+07
Date		05.2003.	05.2003.	06.2003.	06.2003.	06.2003.	06.2003.	07.2003.	07.2003.	07.2003.	07.2003.	07.2003.	08.2003.	08.2003.	08.2003.	08.2003.	09.2003.	09.2003.	09.2003.	09.2003.	09.2003.	10.2003.	10.2003.	10.2003.	10.2003.	11.2003.	11.2003.	11.2003.	11.2003.	12.2003.	12.2003.	12.2003.	12.2003.	12.2003.	01.2004.	01.2004.	01.2004.	01.2004.	02.2004.	02.2004.	02.2004.	02.2004.	03.2004.	03.2004.	03.2004.	03.2004.	03.2004.	04.2004.	04.2004.
All substrata		1.09493e+07	1.07968e+07	1.06288e+07	1.05984e+07	1.01863e+07	9.77414e+06	9.43841e+06	9.11791e+06	8.64476e+06	8.40065e+06	8.4769e+06	8.12595e+06	7.91228e+06	7.62222e+06	7.26287e+06	7.15004e+06	7.07954e+06	7.02305e+06	6.91022e+06	6.75553e+06	6.83979e+06	6.83979e+06	6.72742e+06	6.85381e+06	7.09362e+06	7.05129e+06	7.1218e+06	7.24878e+06	7.34752e+06	7.34752e+06	7.34752e+06	7.40855e+06	7.45436e+06	9.74635e+06	9.92456e+06	1.02214e+07	1.04788e+07	1.07359e+07	1.09736e+07	1.11516e+07	1.13695e+07	1.18443e+07	1.21214e+07	1.24185e+07	1.27944e+07	1.34477e+07	1.39226e+07	1.48924e+07
		BASIC DATA
SUMMA hard substrata		Yearly average
	2003	8.04654e+06
	2004	1.4135e+07
	2005	1.35166e+07
[truncated: 82 more columns]

## Sheet: Table S2 Fonyód lithology
			Table S2
			Fonyód case study - Sampling details
			Sample	depth (m)		sediment description
			1	2.5		very fine sand with some medium sand and mica
			2	2.9		fine sand and mica and sandstone
			3	3		fine sand with some medium sand and mica
			4	3.6		microlaminated silty very fine sand
			5a	3.6		silty very fine sand
			5b			microlaminated silt with very fine sand and coalified plant debris
			6			silty very fine sand and sandstone
			7			clayey very fine sand with Lymnocardium
			8	3.4		"rusty" silty fine sandstone under thick carpest of lumashell
			9a	3.4		microlamminated clay
			9b			sandstone
			10	2.7		silt
			11	3.2		only holocene mud and lumashell
			12	3.1		sandstone with Viviparus, Cardium, Anodonta, Lymnaea
			13			claystone, living Unio? Anodonta? and lots of Dreissena polymorpha
			14			sandstone

## Sheet: Table S3 biovolume, SRbiDre
Table S3
Biovolume, substrate surface assessment, SRbiDre calculation, Lake Balaton filling time scenarios
Biomass in biovolume
Shoreline (cm3/m2 year)																	Pelagic zone mud 2018 (cm3/m2)
		2000		2003	2004	2005		2008	2009	2010	2011	2012	2013	2014	2015		2018
Keszthely	average	50.6717		370.793	532.517	2105.2		855.608	791.973	1031.26	2870.4	1069.38	373.123	1836.44	1326.44		161
	N (number ind.)	469		1529	1469	1723		1618	1431	1281	1185	3343	1496	1798	1520		685
Tihany	average	2683.84		1413.55	627.316	354.998		849.581	3194.96	3269.15	2421	3575.79	433.311	684.911	1316.69		182.469
	N	834		3060	781	1545		1438	1243	328	692	1022	1667	1592	778		1199
	average before 2008		1017.36		average after 2008		1618.75										average	171.735
substate surface assessment
shoreline surfaces (m2)			stone	reed	concrete	angle rod	pier
water level 120 cm			1.74925e+06	15787738	72288.5	15580.3	13903.5
sum (km2)			17.6388
SRbiDre calculation
biovolume (cm3/m2 year)		Shoreline average before 2008			1017.36		after 2008	1618.75
		Pelagic zone average			171.735
calculated densisity of Dp body from Suppl. 2					1,26 g/cm3
calculated density of Drb body from Suppl. 2					1,23 g/cm3				before 2008	after 2008	pelagic (after 2008)
average whole body wet weight (density x biovolume)/m2 surface									1281.87	1991.06	211.234
calculated dry shell/whole body wet weight (g/g) from Suppl 2				Dp	0.392	Drb	0.376
average shell weight (0,392/0,376 x whole body wet weight)/m2 surface)									502.495	748.64	79.4239
shell density	(2,435g/cm3)
shell volume (cm3/m2 surface)									206.363	307.45	32.6176
sedimentation thickness (mm)									0.206363	0.30745	0.0326176
shoreline (17.64 km2 surface) total spent shell production (m3/year)									3639.99	5423.03
pelagic zone (506.4 km2 surface) spent shell production (m3/year)											16504.5
total spent shell production (m3/year, after 2008 shoreline+pelagic zone)											21927.6
total spent shell sediment thickness (mm/year) for the whole surface (524,04 km2)											0.0418146
spent shell sediment thickness (mm/year) if Dp data extrapolated to the lake surface (524,04 km2)											0.00694602
Lake filling time scenarios
basic sedimentation rate (without dreissenids)				1 mm/year
average water depth		3,25 m
lake filling time without dreissenids (year)								3250 mm/1 mm			3250
lake filling time with the presence of Dp (with data before 2008, year) shoreline/lake surface x spent shell prod											3227.58
lake filling time with the presence of Drb (with data after 2008) shoreline+pelagic zone, year											3119.56
lake filling time with the presence of Drb (with data after 2008) shoreline extended, year											2485.76

## Sheet: Table S4 shell-wet weight ratio
Table S4
D. polymorpha (Keszthely) and D. r. bugensis (Keszthely, Tihany) samples were collected in 2018 for calculating body density (wet weight/biovolume) and shell/wet weight ratio.
To each shell length (in mm accuracy) a number of animals were measured. Average scores were depicted in the tables. The body density and the shell-body weight ratio were calculated from the mean data of all size measured, as they do not depend much on the length. Outliers were not incorporated into the calculation.
2018 Keszthely, Drb
length [mm]	5	6	7	8	9	10	11	12	13	14	15	16	17	18	19	20	21	22	23	24	25
number of processed mussel [pc]		4	17	39	32	22	43	41	41	40	35	29	34	23	12	11	4	2	3	1	2	435	sum number
biovolume [ml, cm3]		0.225	0.0588235	0.0641026	0.0625	0.0909091	0.162791	0.219512	0.243902	0.325	0.371429	0.517241	0.617647	0.695652	0.75	0.818182	1.25	1.25	1.33333	1.2	1.5
wet individum weight [g]		0.02655	0.0425235	0.0657256	0.0965719	0.143105	0.185165	0.2442	0.328295	0.395502	0.471886	0.596393	0.465947	0.792504	0.934283	1.0941	1.5542	1.56405	1.8029	1.6606	1.9906
dry shell [g]		0.0084	0.0192941	0.0279744	0.0404344	0.0559091	0.0734512	0.0929683	0.12639	0.153262	0.178954	0.222221	0.269568	0.29503	0.355258	0.424073	0.474325	0.62275	0.6264	0.6955	0.554
density (wet weight/biovolume)		0.118	0.7229	1.02532	1.54515	1.57415	1.13744	1.11247	1.34601	1.21693	1.27046	1.15303	0.75439	1.13923	1.24571	1.33723	1.24336	1.25124	1.35218	1.38383	1.32707
density valuable				1.02532			1.13744	1.11247	1.34601	1.21693	1.27046	1.15303		1.13923	1.24571	1.33723	1.24336	1.25124	1.35218	1.38383	1.32707
mean		1.2361
dry shell/whole body wet weight		0.316384	0.453728	0.425623	0.418697	0.390687	0.396679	0.380706	0.38499	0.387513	0.379232	0.372608	0.578537	0.372276	0.380247	0.3876	0.305189	0.398165	0.34744	0.418825	0.278308
mean		0.388672
2018 Keszthely, Dp
length [mm]	5	6	7	8	9	10	11	12	13	14	15	16	17	18	19	20	21	22	23	24	25
number of processed mussel [pc]		10	32	38	70	63	45	35	34	29	39	23	10	6	3	1						438	sum number
biovolume [ml, cm3]		0.1	0.03125	0.0526316	0.0714286	0.111111	0.155556	0.171429	0.205882	0.310345	0.358974	0.391304	0.5	0.666667	1	1
wet individum weight [g]		0.0007	0.0410187	0.0670184	0.0923	0.128932	0.168764	0.217809	0.289462	0.0648793	0.456174	0.528017	0.63025	0.7822	0.8494	0.6992
dry shell [g]		0.01091	0.0171219	0.0270105	0.03625	0.0497762	0.0622	0.0946286	0.0962588	0.136059	0.162803	0.196061	0.23049	0.2828	0.3001	0.3728
density (wet weight/biovolume)		0.007	1.3126	1.27335	1.2922	1.16039	1.08491	1.27055	1.40596	0.209056	1.27077	1.34938	1.2605	1.1733	0.8494	0.6992
density valuable			1.3126	1.27335	1.2922	1.16039	1.08491	1.27055	1.40596		1.27077	1.34938	1.2605	1.1733
mean		1.25945
dry shell/whole body wet weight			0.417416	0.403031	0.392741	0.386066	0.368561	0.434458	0.332544		0.356887	0.371315	0.365712	0.361544	0.353308	0.533181
mean		0.392441
2018 Tihany, Drb
length [mm]	5	6	7	8	9	10	11	12	13	14	15	16	17	18	19	20	21	22	23	24	25
number of processed mussel [pc]	19	51	54	54	47	45	39	18	17	21	11	17	18	21	18	9	3	1	1			464	sum number
biovolume [ml, cm3]	0.0105263	0.0196078	0.0333333	0.0462963	0.0638298	0.0933333	0.128205	0.15	0.205882	0.261905	0.363636	0.352941	0.5	0.571429	0.638889	0.777778	0.5	0.8	1
wet individum weight [g]	0.0130737	0.0227667	0.0370648	0.0537241	0.0800574	0.110451	0.151285	0.184533	0.260418	0.317648	0.437309	0.456718	0.628106	0.717952	0.803489	0.976011	0.637733	1.0803	1.2014
dry shell [g]	0.00553684	0.00836275	0.0133167	0.000307407	0.0248085	0.0385911	0.0536308	0.0606167	0.0877765	0.106048	0.100536	0.156365	0.226189	0.240938	0.280433	0.349667	0.4054	0.3903	0.4141
density (wet weight/biovolume)	1.242	1.1611	1.11194	1.16044	1.25423	1.1834	1.18002	1.23022	1.26489	1.21284	1.2026	1.29403	1.25621	1.25642	1.25763	1.25487	1.27547	1.35037	1.2014
density valuable	1.242	1.1611	1.11194	1.16044	1.25423	1.1834	1.18002	1.23022	1.26489	1.21284	1.2026	1.29403	1.25621	1.25642	1.25763	1.25487	1.27547	1.35037	1.2014
mean	1.22895
dry shell/whole body wet weight	0.42351	0.367324	0.359281		0.309884	0.349395	0.354502	0.328486	0.33706	0.333853	0.229898	0.342366	0.360113	0.335591	0.34902	0.358261	0.635689	0.361289	0.344681
mean	0.363353
mean of D.r.bugensis body density	1.23253
mean of D.r.bugensis shell/wet weight ratio	0.376013

## Sheet: Table 1
Presenting data of Table 1 published in text in calculating Excel form
Scenarios	Scenario 1	Scenario 2				Scenario 3	Scenario 4	supplementary information
	In the absence of invasive dreissenids	D. polymorpha (datasets 2000-2005)	D. polymorpha (Fonyód Miocene outcrop)*	D. r. bugensis (datasets 2008-2015) hard substrate	D. r. bugensis (datasets 2018) soft substrate	D. r. bugensis (datasets 2008-2018) hard + soft substrates	D. r. bugensis (datasets 2008-2018) hard substrate extended to the whole lake
mean biovolume of living dreissenids (cm3/m2 yr) Suppl. 1		1017.36		1618.75	171.735		1618.75
total whole body wet weight of living dreissenids (body density x biovolume/m2; g/yr) Suppl. 2		1281.87		1991.06	211.234		1991.06	average body density of. D. polymorpha (1.26 g/cm3), D. r. bugensis (1.23 g/cm3)
total shell weight (dry shell/body wet weight x whole body wet weight)/m2; g/yr) Suppl. 2		502.495	75.2864	748.64	79.4239		748.64	dry shell/ body wet weight (g/g) of D. polymorpha (0.392), D. r. bugensis (0.376)
total shell volume (total shell weight/shell density; cm3/m2 yr)		206.363	30.9184	307.45	32.6176		307.45	shell density (2.435 g/cm3)
biogenic accumulation rate (total shell volume/surface; mm/yr)		0.206363	0.03	0.30745	0.0326176		0.30745
total surface (km2)		17.6388	0.012	17.6388	506.4	524.039	524.039
total spent shell production (SR×total surface; m3/yr)		3639.99	0.36	5423.03	16517.6	21940.6	161116
total spent shell sediment thickness (sedimentation rate, SR; related to the whole lake surface (total "lumashell"/lake surface; m3/m2 yr in mm/yr)		0.00694604	6.86972e-07	0.0103485	0.0315197	0.0418683	0.30745	whole lake surface (524.04 km2)
South West part of lake filling time (mean water depth/sedimentation rate, SR; kyr) + 80 yrs top 40 cm	2.93	2.91034	2.93	2.90081	2.84291	2.81547	2.25982	Estimated total sedimentation rate (SRt): 1mm/yr (Korponai et al. 2011); water depth (2.85 m)
Percentage of lake lifespan with dreissenids compared to the lifespan without dreissenid	-	99.329	99.9999	99.0037	97.0278	96.0911	77.1268
Lake filling time (mean water depth/average sedimentation rate, SR; kyr)	7.55814	7.43799	7.55813	7.38052	7.04195	6.88752	4.40708	Estimated total sedimentation rate (SRt) 0.38-0.48 mean: 0.43mm/yr (Cserny, 2002), mean water depth (3.25 m)
Percentage of lake lifespan with dreissenids compared to the lifespan without dreissenid		98.4103	99.9998	97.6499	93.1704	91.1271	58.3091
North East part of lake filling time (mean water depth/sedimentation rate, SR; kyr)	21.6667	20.7078	21.6666	20.2683	17.9044	16.9387	7.10461	Estimated total sedimentation rate (SRt) based on Buczko et al. (2019) (0.15 mm/yr) mean water depth (3.25 m)
Percentage of lake lifespan with dreissenids compared to the lifespan without dreissenid		95.5743	99.9995	93.5462	82.6356	78.1786	32.7905

## Sheet: Table 1 (2)
Presenting data of Table 1 published in text in calculating Excel form
Scenarios	Scenario 1	Scenario 2				Scenario 3	Scenario 4	supplementary information
	In the absence of invasive dreissenids	D. polymorpha (datasets 2000-2005)	D. polymorpha (Fonyód Miocene outcrop)*	D. r. bugensis (datasets 2008-2015) hard substrate	D. r. bugensis (datasets 2018) soft substrate	D. r. bugensis (datasets 2008-2018) hard + soft substrates	D. r. bugensis (datasets 2008-2018) hard substrate extended to the whole lake
mean biovolume of living dreissenids (cm3/m2 yr) Suppl. 1		1017.36		1618.75	171.735		1618.75
total whole body wet weight of living dreissenids (body density x biovolume/m2; g/yr) Suppl. 2		1281.87		1991.06	211.234		1991.06	average body density of. D. polymorpha (1.26 g/cm3), D. r. bugensis (1.23 g/cm3)
total shell weight (dry shell/body wet weight x whole body wet weight)/m2; g/yr) Suppl. 2		502.495	75.2864	748.64	79.4239		748.64	dry shell/ body wet weight (g/g) of D. polymorpha (0.392), D. r. bugensis (0.376)
total shell volume (total shell weight/shell density; cm3/m2 yr)		206.363	30.9184	307.45	32.6176		307.45	shell density (2.435 g/cm3)
biogenic accumulation rate (total shell volume/surface; mm/yr)		0.206363	0.03	0.30745	0.0326176		0.30745
total surface (km2)		17.6388	0.012	17.6388	506.4	524.039	524.039
total spent shell production (SR×total surface; m3/yr)		3639.99	0.36	5423.03	16517.6	21940.6	161116
total spent shell sediment thickness (sedimentation rate, SR; related to the whole lake surface (total "lumashell"/lake surface; m3/m2 yr in mm/yr)		0.00694604	6.86972e-07	0.0103485	0.0315197	0.0418683	0.30745	whole lake surface (524.04 km2)
South West part of lake filling time (mean water depth/sedimentation rate, SR; kyr) + 80 yrs top 40 cm	2.93	2.91034	2.93	2.90081	2.84291	2.81547	2.25982	Estimated total sedimentation rate (SRt): 1mm/yr (Korponai et al. 2011); water depth (2.85 m)
Percentage of lake lifespan with dreissenids compared to the lifespan without dreissenid	-	99.329	99.9999	99.0037	97.0278	96.0911	77.1268
Lake filling time (mean water depth/average sedimentation rate, SR; kyr)	7.55814	7.43799	7.55813	7.38052	7.04195	6.88752	4.40708	Estimated total sedimentation rate (SRt) 0.38-0.48 mean: 0.43mm/yr (Cserny, 2002), mean water depth (3.25 m)
Percentage of lake lifespan with dreissenids compared to the lifespan without dreissenid		98.4103	99.9998	97.6499	93.1704	91.1271	58.3091
North East part of lake filling time (mean water depth/sedimentation rate, SR; kyr)	21.6667	20.7078	21.6666	20.2683	17.9044	16.9387	7.10461	Estimated total sedimentation rate (SRt) based on Buczko et al. (2019) (0.15 mm/yr) mean water depth (3.25 m)
Percentage of lake lifespan with dreissenids compared to the lifespan without dreissenid		95.5743	99.9995	93.5462	82.6356	78.1786	32.7905
